# Supplementary material for: Light-responsive bicyclic peptides
Source: Royal Society of Chemistry journal article supplement (doi:10.1039/c7ob03178e), 2018-01-01
Supplement: c7ob03178e3.pdf [file c7ob03178e3.pdf]

## Supplementary Information for:

### Light-Responsive Bicyclic Peptides

Mohammad R. Jafari, Hongtao Yu, Jessica M. Wickware, Yu-Shan Lin, Ratmir Derda\*

\*Corresponding author: [ratmir@ualberta.ca](mailto:ratmir@ualberta.ca)

|                                                                                                                                         |     |
|-----------------------------------------------------------------------------------------------------------------------------------------|-----|
| Abbreviations .....                                                                                                                     | S2  |
| Materials and methods.....                                                                                                              | S3  |
| Synthesis of 1a-1d, HADCAz and intermediates .....                                                                                      | S3  |
| General Procedure for Synthesis of Peptides Using Fmoc Chemistry .....                                                                  | S10 |
| General Procedure for Periodate Oxidation of Serine in Peptide Sequence $SX_nCRRRRC$ .....                                              | S11 |
| General Procedure for Synthesis of Bicyclic Peptide .....                                                                               | S11 |
| Kinetics and Switching Efficiency of HADCAz and Bicyclic Peptides. ....                                                                 | S11 |
| Fig. S1 (A)-(D) Absorption spectra of compounds 1a-1d before and after irradiation. ....                                                | S13 |
| Fig. S2 (A)-(D) LCMS traces confirm the synthesis of bicyclic peptides 3a-3d. ....                                                      | S14 |
| Fig. S3 Optimization of the formation of oxime bond with and without aniline catalyst .....                                             | S15 |
| Fig. S4 Oxidation of 4 results in a mixture of byproducts, including oxidized sulfides.....                                             | S16 |
| Fig. S5 Absorption spectra of 3a-3d before and after irradiation with 365 nm light. ....                                                | S17 |
| Fig. S6 Kinetics of thermal relaxation for 3a-3d .....                                                                                  | S18 |
| Fig. S7 LCMS traces of disulfide peptides. ....                                                                                         | S19 |
| Fig. S8 LCMS traces of the peptides after oxidation of the N-terminal serine with NaIO <sub>4</sub> . ....                              | S20 |
| Fig. S9 LCMS traces of purified peptide 3a-3d and HRMS characterization. ....                                                           | S21 |
| Fig. S10 LCMS traces of the reaction between the peptide SDKSWCRRRRC and HADCAz..                                                       | S22 |
| Fig. S11 LCMS traces of the reaction between the peptide SKSWCRRRRC and HADCAz .....                                                    | S23 |
| Fig. S12 LCMS traces of the reaction between the peptide SSWCRRRRC and HADCAz.....                                                      | S24 |
| Fig. S13 LCMS traces of the reaction between the peptide SWCRRRRC and HADCAz.....                                                       | S25 |
| Fig. S14 Cluster analysis and representative selected structures of dark <b>3a</b> and light <b>3a</b> .....                            | S26 |
| Fig. S15 Representative selected structures of dark <b>3b</b> , <b>3c</b> , <b>3d</b> and light <b>3b</b> , <b>3c</b> , <b>3d</b> ..... | S27 |
| Fig. S16 Omega dihedral plot of the azobenzene N=N bond and the linker amide bond.....                                                  | S28 |
| Fig. S17 NOE spectra of <b>3a</b> and <b>3d</b> indicate presence of <i>cis</i> and <i>trans</i> aromatic amide bonds. ..               | S29 |
| NMR spectra of synthesized compounds.....                                                                                               | S30 |
| 1d and 2d NMR analyses of bicycle <b>3d</b> .....                                                                                       | S60 |
| 1d and 2d NMR analyses of bicycle <b>3c</b> .....                                                                                       | S66 |
| 1d and 2d NMR analyses of bicycle <b>3b</b> .....                                                                                       | S72 |
| 1d and 2d NMR analyses of bicycle <b>3a</b> .....                                                                                       | S77 |
| Supporting Information References .....                                                                                                 | S83 |

## Abbreviations

|               |                                                                                                     |
|---------------|-----------------------------------------------------------------------------------------------------|
| 1D            | one-dimensional                                                                                     |
| AM resin      | aminomethyl resin                                                                                   |
| APT           | attached proton test                                                                                |
| AU            | arbitrary unit                                                                                      |
| Azb           | azobenzene                                                                                          |
| Boc           | <i>tert</i> -butoxycarbonyl                                                                         |
| calc.         | calculated                                                                                          |
| Da            | dalton(s)                                                                                           |
| DCM           | dichloromethane                                                                                     |
| DIPEA         | <i>N,N</i> -Diisopropylethylamine                                                                   |
| DMF           | dimethylformamide                                                                                   |
| EDC.HCl       | 1-ethyl-3-(3-dimethylaminopropyl)carbodiimide hydrochloride                                         |
| EDT           | 1,2-ethanedithiol                                                                                   |
| eq.           | equivalent(s)                                                                                       |
| ESI           | electrospray ionization                                                                             |
| EtOAc         | ethyl acetate                                                                                       |
| EtOH          | ethanol                                                                                             |
| Fmoc          | fluorenylmethoxycarbonyl chloride                                                                   |
| h             | hour(s)                                                                                             |
| HBTU          | <i>N,N,N',N'</i> -tetramethyl- <i>O</i> -(1 <i>H</i> -benzotriazol-1-yl)uranium hexafluorophosphate |
| <b>HADCAz</b> | hydroxyl amine and di-chlorobenzene containing azobenzene                                           |
| HRMS          | high-resolution mass spectrometry                                                                   |
| LCMS          | liquid chromatography-mass spectrometry                                                             |
| MALDI-MS      | matrix-assisted laser desorption ionization-mass spectrometry                                       |
| MeCN          | acetonitrile                                                                                        |
| MHz           | megahertz                                                                                           |
| MeOH          | methanol                                                                                            |
| NMR           | nuclear magnetic resonance                                                                          |
| NOESY         | nuclear overhauser effect spectroscopy                                                              |
| mL            | milliliter(s)                                                                                       |
| min           | minute(s)                                                                                           |
| mmol          | millimoles                                                                                          |
| nm            | nanometer(s)                                                                                        |
| ppm           | parts per million                                                                                   |
| ref.          | reference                                                                                           |
| ROESY         | rotating frame overhauser effect spectroscopy                                                       |
| r.t.          | room temperature                                                                                    |
| TCEP          | tris(2-carboxyethyl) phosphine                                                                      |
| temp.         | temperature                                                                                         |
| TFA           | trifluoroacetic acid                                                                                |
| THF           | tetrahydrofuran                                                                                     |
| TIPS          | triisopropylsilane                                                                                  |
| TOCSY         | total correlation spectroscopy                                                                      |
| UV            | ultraviolet                                                                                         |
| v/v           | volume/volume                                                                                       |
| w/v           | weight/volume                                                                                       |

## Materials and methods

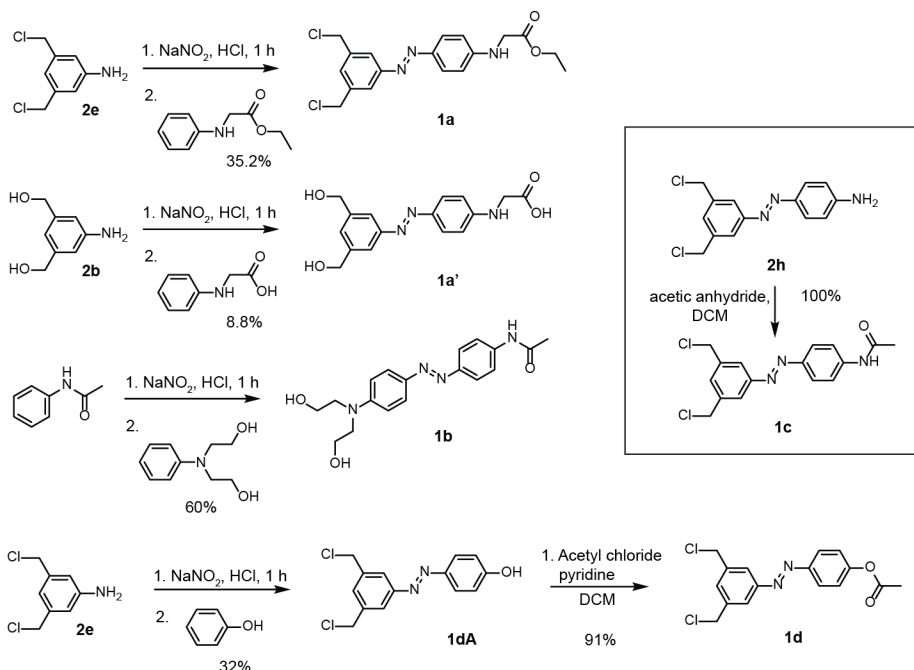

**Scheme S1.** Syntheses of azobenzene derivatives **1a**, **1a'**, **1b**, **1c**, **1d**.

## Synthesis of 1a-1d, HADCAz and intermediates

### Synthesis of **1a**

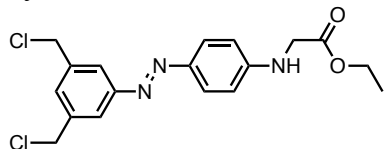

To an ice cold solution of 450 mg (2.4 mmol) of compound **2e** (see the following) in 10 mL EtOH, we added 2 mL of 2 M HCl and stirred the solution on ice for 30 min. To this mixture we added a solution of 165 mg (2.4 mmol) of NaNO<sub>2</sub> in water drop wise with vigorous stirring for 1 h to form the diazo salt. Then we added the diazo salt solution drop wise to an ice cold solution of 537 mg (3 mmol) of *N*-phenyl-ethylglycine in 50 mL of EtOH/2 M aqueous glycine (0.2 M, pH 5) = 1/1. After stirring for 15 min at this temperature, the solution was warmed up to r.t. and stirred for an additional 2 h. Then we evaporated the solvents on a rotary evaporator and dissolved the solids in a 100 mL mixture of DCM/2 M HCl = 1/1. The organic phase was separated and the aqueous phase was extracted twice with 50 mL of DCM. The organic phases were combined and the solvent was removed on a rotary evaporator. The resulting solid was purified on silica by column chromatography (eluted in hexane/EtOAc = 85/15) to yield the azobenzene **1c** as orange crystals (620 mg, 32.5%). <sup>1</sup>H-NMR (399.8 MHz, CDCl<sub>3</sub>) δ 7.91 (d, *J* = 8.4 Hz, 2 H), 7.86 (s, 2 H), 7.47 (s, 1 H), 6.71 (d, *J* = 8.4 Hz, 2 H), 4.67 (s, 4 H), 4.29 (q, *J* = 7.2 Hz, 2 H), 4.02 (s, 2 H), 1.33 (t, *J* = 7.2 Hz, 3 H) ppm. <sup>13</sup>C-NMR (100.5 MHz, CDCl<sub>3</sub>) δ 170.1, 152.7, 150.6, 144.6, 139.0, 129.4, 126.2, 122.2, 112.8, 61.7, 45.26, 45.2, 14.2

ppm. **HRMS-ESI** ( $m/z$ ): ( $M+H$ )<sup>+</sup> calc. for C<sub>18</sub>H<sub>19</sub>Cl<sub>2</sub>N<sub>3</sub>O<sub>2</sub>: 380.0927, observed: 380.0918; 2.23 ppm.

Synthesis of [(4-{(E)-[3,5-bis(hydroxymethyl)phenyl]diazenyl}phenyl)amino]acetic acid (**1a'**)

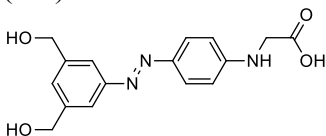

To an ice cold solution of 462 mg (3 mmol) of compound **2b** (see the following) in 4 mL methanol, we added, 2 mL of 2 M HCl and the solution was stirred on ice for 30 min. To this mixture we added a solution of 104.3 mg (3 mmol) of NaNO<sub>2</sub> in water drop wise with vigorous stirring for 1 h to form the diazo salt. Then we added the diazo salt solution drop wise to an ice cold solution of 453 mg (3 mmol) of phenyl glycine in 50 mL of THF/NaHCO<sub>3</sub> = 5/1. After stirring for 1 h at this temperature, the solution was warmed up to r.t. and further stirred overnight. Then we evaporated the solvents and dissolved the solids in a 100 mL mixture of DCM/brine = 1/1. The organic phase was separated and the aqueous phase was extracted twice with 50 mL of DCM. The organic phase was combined and the solvent was removed by rotary evaporator. The resulting solid was purified on silica by column chromatography to yield the azobenzene **1c** as orange crystals (8.8%). **<sup>1</sup>H-NMR** (399.8 MHz, DMSO) δ 7.70 (d,  $J$  = 8.8 Hz, 2 H), 7.57 (s, 2H), 7.29 (s, 1 H), 6.64 (d,  $J$  = 8.8 Hz, 2 H), 4.52 (s, 4 H), 3.92 (s, 2 H) ppm. **<sup>13</sup>C-NMR** (125.7 MHz, DMSO) δ 171.8, 152.0, 151.7, 143.5, 143.1, 125.5, 125.0, 118.0, 112.0, 62.6, 44.3 ppm. **HRMS-ESI** ( $m/z$ ): ( $M+H$ )<sup>+</sup> calc. for C<sub>16</sub>H<sub>18</sub>N<sub>3</sub>O<sub>4</sub>: 316.1292, observed: 316.1295; -0.88 ppm.

Synthesis of N-{4-[(E)-{4-[bis(2-hydroxyethyl)amino]phenyl}diazenyl]phenyl}acetamide (**1b**)

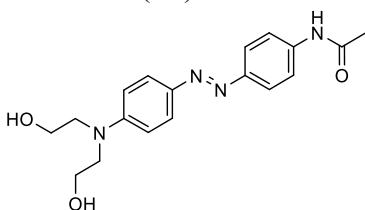

To an ice cold solution of 4-aminoacetanilide (182 mg, 1.2 mmol) in 4 mL of 1 M HCl 1M, we added 1.2 mL of a 1 M solution of NaNO<sub>2</sub> drop wise. After stirring the reaction mixture on ice for 1 h, we slowly added the mixture to an ice cold solution of *N*-phenyldiethanolamin (253 mg 1.4 mmol) in EtOH/H<sub>2</sub>O = 1/1 with vigorous stirring. We stirred the solution for 3 h, then removed the solvent on a rotary evaporator and purified the products over silica by column chromatography. The product was eluted by DCM/MeOH = 4/1 to yield the compound **1b** as an orange solid (288 mg, 60%). **<sup>1</sup>H-NMR** (399.8 MHz, CDCl<sub>3</sub>) δ 10.2 (s, 1 H), 7.72 – 7.68 (m, 6 H), 6.80 (d,  $J$  = 8.8 Hz, 2 H), 3.76 (t,  $J$  = 5.6 Hz, 4 H), 4.82 (t,  $J$  = 5.2, 2 H), 3.60 – 3.51 (m, 4 H), 2.10 (s, 3 H) ppm. **<sup>13</sup>C-NMR** (100.5 MHz, DMSO) δ 169.0, 151.0, 148.4, 142.8, 141.1, 125.0, 123.0,

119.6, 111.7, 58.6, 53.7, 24.6 ppm. **HRMS-ESI** ( $m/z$ ): ( $M+H$ )<sup>+</sup> calc. for C<sub>18</sub>H<sub>22</sub>N<sub>4</sub>O<sub>3</sub>: 343.1765, observed: 343.1763; 0.47 ppm.

#### Synthesis of N-(4-{(E)-[3,5-bis(chloromethyl)phenyl]diazenyl}phenyl)acetamide (**1c**)

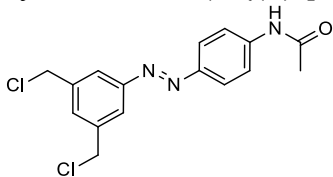

To 100 mg of a solution of compound **2h** in dichloromethane, we added 0.2 mL of acetic anhydride and stirred the solution for 1 h at r.t. The excess acetic anhydride was then removed by rotary evaporator and the compound **1c** was obtained as an orange solid (100 mg, 100%). **<sup>1</sup>H-NMR** (400.0 MHz, CDOD<sub>3</sub>/CDCl<sub>3</sub>: 3/1) 7.88 (d,  $J$  = 8.8 Hz, 2 H), 7.79 (s, 2 H), 7.74 (d,  $J$  = 8.8 Hz, 2 H), 7.48 (s, 1 H), 4.71 (s, 4 H), 2.17 (s, 3 H) ppm. **<sup>13</sup>C-NMR** (100.6 MHz, CDOD<sub>3</sub>/CDCl<sub>3</sub>: 3/1)  $\delta$  171.7, 154.2, 149.9, 144.1, 142.7, 128.4, 124.6, 120.9, 120.8, 64.7, 24.0 ppm. **HRMS-ESI** ( $m/z$ ): ( $M+H$ )<sup>+</sup> calc. for: C<sub>16</sub>H<sub>17</sub>Cl<sub>2</sub>N<sub>4</sub>O<sub>2</sub>: 367.0723, observed: 367.0723; -0.22 ppm.

#### Synthesis of **1dA**

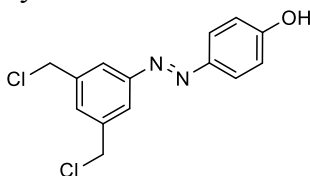

To an ice cold solution of **2e** (190 mg, 1 mmol) in THF, we added 2 mL of 2 M HCl. Then we added 1 mL of a 1 M solution of NaNO<sub>2</sub> in water dropwise. After stirring on ice for 1 h we slowly added this mixture to an ice cold solution of phenol (113 mg, 1 mmol) in saturated NaHCO<sub>3</sub>. The reaction mixture was stirred at this temperature for 30 min and then was warmed up to r.t., then stirred at r.t. for another 2 h. The solvent was removed on a rotary evaporator and the resulting mixture was purified over silica by column chromatography (eluted in DCM/MeOH = 9/1) to yield **1dA** as orange crystals (94 mg, 32%). **<sup>1</sup>H-NMR** (399.8 MHz, CDCl<sub>3</sub>)  $\delta$  7.90 (dd,  $J$  = 8.8 Hz,  $J$  = 2 Hz, 2 H), 7.87 (d,  $J$  = 0.8 Hz, 2 H), 7.52 (d,  $J$  = 0.8 Hz, 1 H), 6.96 (dd,  $J$  = 8.8 Hz,  $J$  = 2 Hz, 2 H), 4.69 (s, 4 H) ppm. **<sup>13</sup>C-NMR** (399.8 MHz, CDCl<sub>3</sub>)  $\delta$  158.6, 153.1, 147.0, 139.1, 130.1, 125.2, 122.6, 116.0, 45.4 ppm. **HRMS-ESI** ( $m/z$ ): ( $M+H$ )<sup>+</sup> calc. for C<sub>14</sub>H<sub>13</sub>N<sub>2</sub>Cl<sub>2</sub>O: 295.0399, observed: 295.0399; 0.46 ppm.

### Synthesis of **1d**

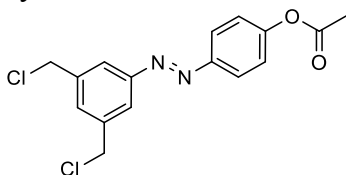

To a solution of **1dA** (60 mg, 0.2 mmol) in dichloromethane, we added acetyl chloride (212  $\mu$ L, 0.3 mmol) followed 100  $\mu$ L of pyridine. The reaction was then warmed to r.t. and stirred for 1 h at this temperature. After the completion of the reaction, the solvent was evaporated on a rotary evaporator and the resulting solid was purified on silica by column chromatography. The product eluted in DCM/MeOH = 9/1 and solvent was removed on a rotary evaporator to yield **1d** (62 mg, 91%) as orange crystals. **<sup>1</sup>H-NMR** (499.8 MHz, CDCl<sub>3</sub>)  $\delta$  7.98 (d,  $J$  = 8.8, 2 H), 7.92 (s, 2 H), 7.57 (s, 1 H), 7.29, (d,  $J$  = 8.8, Hz, 2 H), 4.70 (s, 4 H), 2.37 (s, 3H) ppm. **<sup>13</sup>C-NMR** (125.7 MHz, CDCl<sub>3</sub>)  $\delta$  169.0, 153.0, 153.0, 150.0, 139.2, 130.8, 124.3, 122.9, 122.3, 45.4, 21.2 ppm. **HRMS-ESI** ( $m/z$ ): (M+H)<sup>+</sup> calc. for: C<sub>16</sub>H<sub>15</sub>Cl<sub>2</sub>N<sub>2</sub>O<sub>2</sub>: 337.0505, observed: 337.0502, -0.75 ppm.

### Synthesis of 3,5-bis(hydroxymethyl) aniline (**2b**)

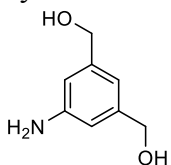

We synthesized 3,5-bis(hydroxymethyl) aniline through a previously published method.<sup>1</sup> To an ice cold solution of diethyl-5-(amino)isophthalate (**2a**) (5.23 g, 25 mmol, TCI Chemicals) in THF (300 mL) we slowly added an ice cold suspension of LiAlH<sub>4</sub> (2.77 g, 75 mmol) in THF (200 mL) with vigorous stirring. After stirring for 30 min at this temperature, the solution was warmed up to room temperature and was stirred for an additional 2 h. Upon the completion of the reaction, the excess LiAlH<sub>4</sub> was quenched by slowly adding 60 mL ethyl acetate and stirring for 1 h, followed by 20 mL of methanol. Then we added 50 mL of a solution of saturated NH<sub>4</sub>Cl to hydrolyze the aluminum salt. The resulting mixture was filtered off and the filtrate was concentrated using a rotary evaporator. The resulting solids were further purified by silica gel column chromatography to give compound **2b** (69% yield). **<sup>1</sup>H-NMR** (400.0 MHz, CDOD<sub>3</sub>):  $\delta$  6.67 (s, 1H) 6.61 (s, 2H), 4.46 (s, 4 H) ppm. **<sup>13</sup>C-NMR** (100.6 MHz, CDOD<sub>3</sub>):  $\delta$  147.3, 142.3, 115.2, 113.0, 63.5 ppm. **HRMS-ESI** ( $m/z$ ): calc. for C<sub>8</sub>H<sub>12</sub>NO<sub>2</sub> (M+H)<sup>+</sup>: 154.0868; found: 154.0861; 0.89 ppm.

### Synthesis of 3,5-bis(hydroxymethyl) aniline-*tert*-butyl carbamate (**2c**)

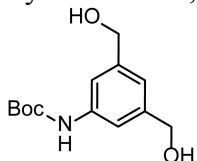

To a solution of 3,5-bis(hydroxymethyl) aniline (compound **2b**) (7 g, 45.5 mmol) in 200 mL DMF, we added di-*tert*-butyl dicarbonate (10.9 g, 50 mmol) with vigorous stirring.

After stirring for 2 h, the solvent was evaporated and the crude solid was purified over silica by column chromatography to give the white solid compound **2c** (94%). **<sup>1</sup>H-NMR** (399.7 MHz, CDOD<sub>3</sub>): δ 7.31 (s, 2 H), 6.99 (s, 1 H), 4.54 (s, 4 H), 1.50 (s, 9 H). **<sup>13</sup>C-NMR** (100.5 MHz, CDOD<sub>3</sub>): δ 153.9, 142.1, 139.2, 119.3, 115.9, 79.4, 63.7, 27.3. **HRMS-ESI** (*m/z*): calc. for C<sub>13</sub>H<sub>19</sub>NO<sub>4</sub> (M+H)<sup>+</sup>: 271.1652; found: 241.1649; 0.33 ppm.

#### Synthesis of 3,5-bis(chloromethyl) aniline-*tert*-butyl carbamate (**2d**)

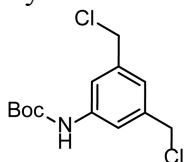

To an ice cold suspension of compound **2c** (7 g, 27.6 mmol) in 200 mL THF, we slowly added methanesulfonyl chloride (5.3 mL, 69 mmol), followed by triethylamine (7.6 mL, 55 mmol). The mixture was stirred at 0 °C for 30 min followed by stirring at room temperature for an hour. To the resulting solution, we slowly added a solution of LiCl (2.8 g, 69 mmol) in 100 mL DMF and the reaction mixture was stirred for 2 h at r.t. After completion of the reaction, the solvent was evaporated and the resulting mixture was dissolved in 200 mL of a 1:1 mixture of dichloromethane (DCM) and 0.1 M aqueous solution of NaHCO<sub>3</sub> in water. The organic phase was separated and the aqueous phase was extracted twice by 100 mL of DCM. The organic phases were combined and the solvent was evaporated. The resulting crude mixture was purified over silica by column chromatography to yield **2d** as a fluffy powder (7.6 g, 82%). **<sup>1</sup>H-NMR** (399.7 MHz, CDCl<sub>3</sub>): δ 7.39 (d, J=1.2 Hz, 2 H), 7.39 (d, J=1.2 Hz, 1 H), 6.65 (broad, 1 H), 4.53 (s, 4 H), 1.53 (s, 9 H). **<sup>13</sup>C-NMR** (100.5 MHz, CD<sub>3</sub>OD): δ 152.6, 139.2, 138.9, 123.0, 118.35, 81.1, 45.7, 28.3. **HRMS-ESI** (*m/z*): ESI (*m/z*): calc. for C<sub>13</sub>H<sub>17</sub>Cl<sub>2</sub>NO<sub>2</sub> Na (M+Na)<sup>+</sup>: 312.0529; found: 312.0527; 0.65 ppm

#### Synthesis of 3,5-bis(chloromethyl) aniline (**2e**)

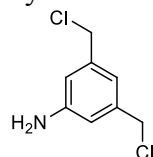

To 1.17 g of compound **2d** we added 6 mL of trifluoroacetic acid (TFA) at room temperature, with vigorous stirring. After 30 min, the TFA was evaporated and the resulting solid was used with no further purification (0.71 g, quantitative). **<sup>1</sup>H-NMR** (399.8 MHz, CDCl<sub>3</sub>): δ 6.79 (s, 1 H), 6.69 (s, 1H), 4.50 (s, 4H) 3.69 (br, 2H). **<sup>13</sup>C-NMR** (100.5 MHz, CDCl<sub>3</sub>): δ 147.2, 139.1, 118.7, 115.0, 46.0 ppm. **HRMS-ESI** (*m/z*): (M+H)<sup>+</sup> calc. for C<sub>8</sub>H<sub>10</sub>Cl<sub>2</sub>N: 190.0184, observed: 190.0184; 0.3ppm

### Synthesis of 4-methoxy-N-phenyl-benzylamine (**2f**)

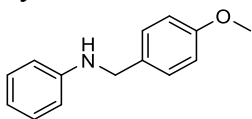

To a solution of 5.1 mL (55 mmol) of aniline in 100 mL methanol, we added 6.1 mL (55 mmol) of 4-methoxy benzaldehyde with vigorous stirring. After refluxing overnight, the reaction was cooled down to 0 °C and NaBH<sub>4</sub> (1.9 g, 500 mmol) was added in small portions along with vigorous stirring. We stirred the reaction for 30 min on ice and an additional 1 h at room temperature. We evaporated the solvent by rotary evaporator and re-dissolved the solid in DCM/0.1 M HCl = 1:1. The organic phase was washed three times with HCl solution, pH 3. The combined organic phases were evaporated on rotary evaporator. Crude product was purified by column chromatography over silica. The product eluted in hexane/EtOAc = 85:15 to yield compound **2f** as a white solid (10.4 g, 88%). <sup>1</sup>H-NMR (399.8 MHz, CDCl<sub>3</sub>): δ 7.34 (dd, *J*=6.4 Hz, *J*=2 Hz, 2 H), 7.23 (dd, *J*=8.4 Hz, *J*=7.6 Hz, 2 H), 6.93 (dd, *J*=6.4 Hz, *J*=2 Hz, 2 H), 6.77 (dd, *J*=8.4 Hz, *J*=2 Hz, 1 H), 6.68 (dd, *J*=7.6 Hz, *J*=2 Hz, 2 H), 4.30 (s, 2 H), 3.99 (br, 1 H), 3.85 (s, 3H) <sup>13</sup>C-NMR (100.5 MHz, CDCl<sub>3</sub>): δ 158.9, 148.3, 138.5, 129.3, 128.9, 117.5, 114.0, 112.9, 55.3, 47.8. HRMS-ESI (*m/z*): (M+H)<sup>+</sup> calc. for C<sub>14</sub>H<sub>15</sub>NO: 214.1226, observed: 214.1223; 1.67 ppm.

### Synthesis of **2g**

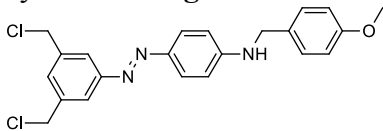

To an ice cold solution of 760 mg (4 mmol) of compound **2e** in 4 mL methanol, we added, 4 mL of 2 M HCl and the solution was stirred on ice for 30 min. To this mixture we added a solution of 276 mg of NaNO<sub>2</sub> (4 mmol) in water drop wise with vigorous stirring for 1 h to form the diazo salt. Then we added the diazo salt solution drop wise to an ice cold solution of **2f** in 50 mL of THF and the pH was adjusted to 5 with a saturated solution of NaHCO<sub>3</sub>. After stirring for 1 h at this temperature, the solution was warmed up to r.t. and further stirred overnight. Then we evaporated the solvents on a rotary evaporator and dissolved the solids in a 100 mL mixture of DCM/brine = 1/1. The organic phase was separated and the aqueous layer was extracted twice with 50 mL of DCM. The organic layers were combined and dried on a rotary evaporator. The resulting solid was purified on silica by column chromatography; the product was eluted in hexane/EtOAc = 3/1 to yield the **2g** as orange crystals (1.03 g, 62%). <sup>1</sup>H NMR (399.9 MHz, CDCl<sub>3</sub>) δ 7.85 (d, *J*=8.8 Hz, 2 H), 7.83 (d, *J*=2 Hz, 2 H), 7.45 (t, *J*=2 Hz, 1 H), 7.29 (dd, *J*=6.8 Hz, *J*=2.4 Hz, 2 H), 6.91 (dd, *J*=6.8 Hz, *J*=2.4 Hz, 2 H), 6.69 (d, *J*=8.8 Hz, 2 H), 4.65 (s, 4 H), 4.35 (s, 2H), 3.81 (s, 3 H) ppm. <sup>13</sup>C-NMR (100.6 MHz, CDCl<sub>3</sub>) δ 159.1, 153.5, 151.2, 144.6, 138.9, 130.2, 129.2, 128.8, 125.6, 122.3, 114.2, 122.4, 55.3, 47.3, 45.6 ppm. HRMS-ESI (*m/z*): (M+H)<sup>+</sup> calc. for C<sub>22</sub>H<sub>20</sub>Cl<sub>2</sub>N<sub>3</sub>O: 412.0978, observed: 412.0982; 0.89 ppm.

### Synthesis of **2h**

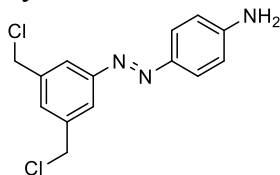

To 100 mg of compound **2g**, we added 500  $\mu$ L of anisole, followed by 5 mL of TFA and the resulting mixture was stirred in dark for at least 2 h at r.t. After completion of the reaction, the solvent was removed by rotary evaporator and the resulting solid was re-dissolved in MeOH and neutralized by saturated  $\text{NaHCO}_3$  solution. The resulting mixture was removed by rotary evaporator and further purified by column chromatography, the product was eluted in hexane/EtOAc = 65/75 to give compound **2h** as an orange solid (600 mg, 85%).  **$^1\text{H-NMR}$**  (399.8 MHz,  $\text{CDCl}_3$ )  $\delta$  7.843 (s, 2 H), 7.83 (d,  $J$  = 8.5 Hz, 2H) 7.48 (s, 1 H), 6.757 (d,  $J$  = 8.5 Hz, 2H), 4.68 (s, 2 H)  **$^{13}\text{C-NMR}$**  (100.5 MHz,  $\text{CDCl}_3$ )  $\delta$  153.5, 150.1, 145.4, 138.9, 129.5, 125.4, 122.4, 114.6, 45.5 **HRMS-ESI** ( $m/z$ ): ( $\text{M}+\text{H}$ )<sup>+</sup> calc. for  $\text{C}_{14}\text{H}_{13}\text{Cl}_2\text{N}_3$ : 294.0559, observed: 294.0557; 0.87 ppm.

### Synthesis of **2i**

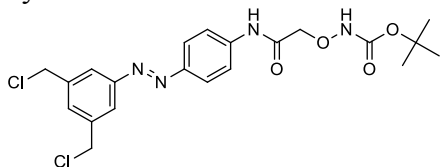

To a solution of 70 mg (0.24 mmol) of compound **2h** in 25 mL of THF, we added (BOC-aminooxy)acetic acid (92 mg, 0.48 mmol) followed by EDC.HCl (115 mg, 0.6 mmol) and  $\text{N,N}$ -diisopropylethylamine (81  $\mu$ L, 0.48 mmol) with vigorous stirring. The reaction was allowed to stir for 2 h and then was washed with 20 mL of water followed by 20 mL of brine. The resulting solid was purified over silica by column chromatography; the product was eluted in hexane/EtOAc = 3/1 to yield compound **2i** as an orange solid (80 mg, 72%).  **$^1\text{H-NMR}$**  (399.8 MHz,  $\text{CDCl}_3$ )  $\delta$  10.6 (br, 1 H) 7.97-7.88 (m, 7 H), 7.5 (s, 1 H) 4.68 (s, 4H), 4.49 (s, 2 H), 1.53 (s, 9 H)  **$^{13}\text{C-NMR}$**  (100.5 MHz,  $\text{CDCl}_3$ )  $\delta$  167.5, 158.5, 153.16, 148.82, 141.0, 139.0, 130.4, 124.1, 122.7, 129.9, 83.9, 77.1, 45.4, 28.1 **HRMS-ESI** ( $m/z$ ): ( $\text{M}+\text{H}$ )<sup>+</sup> calc. for  $\text{C}_{21}\text{H}_{24}\text{Cl}_2\text{N}_4\text{O}_4$ : 467.1247, observed: 467.1244; 0.5 ppm.

### Synthesis of **2j** (HADCAz)

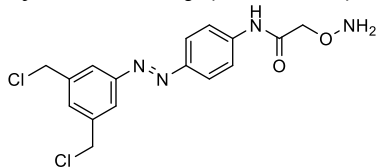

To 150 mg of the compound **2i**, we added 2 mL of TFA and stirred the mixture for 15 min. The TFA was then evaporated by rotary evaporator, and the resulting compound was purified on silica by column chromatography with no further workup. The product was eluted in hexane/EtOAc = 7/3 to yield compound **2j** as orange solid (108 mg, 92%).  **$^1\text{H-NMR}$**  (399.8 MHz,  $\text{CDCl}_3$ )  $\delta$  7.94 (dt,  $J$  = 8.8 Hz,  $J$  = 2 Hz, 2 H), 7.90 (d,  $J$  = 1.6 Hz,

2 H), 7.83 (dt,  $J = 8.8$  Hz,  $J = 2$  Hz, 2 H), 7.61 (t,  $J = 1.6$  Hz, 1 H), 4.74 (s, 4 H), 4.68 (s, 2 H) ppm.  $^{13}\text{C-NMR}$  (100.6 MHz,  $\text{CDOD}_3$ )  $\delta$ 168.6, 154.4, 150.3, 142.2, 141.2, 132.0, 125.0, 123.6, 121.3, 73.1, 46.0 ppm. **HRMS-ESI** ( $m/z$ ): ( $\text{M}+\text{H}$ ) $^+$  calc. for  $\text{C}_{16}\text{H}_{17}\text{Cl}_2\text{N}_4\text{O}_2$ : 367.0723 Da, observed: 367.0723, -0.22 ppm.

### General Procedure for Synthesis of Peptides Using Fmoc Chemistry

We synthesized the peptides using Rink Amide AM resin (Chempep) standard solid phase amide coupling. Briefly, we transferred 250 mg (0.24 mmol, 0.96 mmol/g) into a PolyPrep® chromatography column. We set up the column on a manifold vacuum and equipped it with a three-way stopcock that allows draining of the solvent by vacuum filtration. Agitation of the resin was done by purging nitrogen gas as described by Verdine and co-workers.<sup>2</sup> We added 3 mL of DCM to the dry resin and let it swell for 15 min. We drained the DCM and re-suspended the resin in 3 mL of DMF for 15 min. Then, we drained the DMF and deprotected the amine with 20% (v/v) piperidine in DMF (4 mL) for 1 min. The deprotection was repeated for another 9 min using fresh 20% (v/v) piperidine in DMF (4 mL). We washed the resin with DMF (4 x 4 mL), and dissolved Fmoc-protected amino acid (0.96 mmol, 4 eq.) in 3 mL of DMF (4 mL). HBTU was added (0.96 mmol, 4 eq) to the solution until dissolution occurred. We added this mixture to the resin, followed by 0.3 mL of DIPEA (1.92 mmol, 8 eq). After 30 minutes of mixing, we removed the reagents by vacuum filtration and washed the resin with DMF (4 x 4 mL). The Fmoc-deprotection, amide coupling, and washing steps were subsequently repeated to elongate the sequence up to the N-terminal residue. After Fmoc deprotection, we washed the resin with DMF (5 x 4 mL), followed by DCM (5 x 4 mL) and left the resin on the manifold for 10 min to dry under vacuum. We added the cleavage cocktail (4 mL, TFA/ $\text{H}_2\text{O}$ /TIPS/Phenol/EDT, 90/2.5/5/5/2.5 (v/v/v/w/v)), to the dried resin and rocked the column for 2 h to cleave the peptide. Next, we collected the flow through from the column and washed the resin with TFA (1 mL), and then added this combined cleavage mixture drop-wise to 40 mL of ice cold diethyl ether in a 50 mL polypropylene centrifuge tube (Falcon, Thermo Fisher). The mixture was incubated on ice for 30 min, and the precipitates separated by centrifugation (5 min, 3000 rpm). Then, we decanted the supernatant and washed the precipitates with cold diethyl ether (2 x 40 mL). After air drying the peptides were dissolved in 40 mL of 50% aqueous MeCN solution with pH adjusted to 8 by aqueous ammonia. We then added 500  $\mu\text{L}$  of DMSO to this solution, and stirred the mixture for 24 h at room temperature in the presence of air to form the disulfide bonds. The solution was then concentrated to 5 mL by speedvac (Thermo Scientific) and was purified by HPLC. Addition of 10% acetic acid was often necessary to dissolve the peptide, before purification.

For HPLC purification, we injected the peptide solution into a semi preparative RP-HPLC system equipped with C18 column (Waters Symmetryprep 19 x 50 mm). A gradient of solvent A (MQ water, 0.1% (v/v) TFA) and solvent B (MeCN, 0.1% (v/v) TFA) was run at a flow rate of 8 mL/min (0-2 min: 2% A; 2-18 min: 2 $\rightarrow$ 50% B). We used same method for all the purifications with HPLC, unless otherwise noted. The fractions corresponding to the main peak were collected. We removed the acetonitrile by evaporation under reduced pressure. Lyophilizing the aqueous fraction yielded the

peptide as white powder. Identity and purity of the peptides was confirmed by LCMS (Fig. S7).

### **General Procedure for Periodate Oxidation of Serine in Peptide Sequence**

#### **SX<sub>n</sub>CRRRRC**

To an ice cold solution of 10 mg peptide in 10 mL of 100 mM phosphate buffer (pH 7.4) we added a solution of NaIO<sub>4</sub> (2 eq) in one portion. The reaction mixture was incubated on ice for 10 min and at r.t. for an additional 10 min and then was purified with HPLC on C18 silica. In some cases, we observed precipitation. In this case, the solution was acidified to pH~ 5 with 10% AcOH to dissolve the peptide and then was immediately injected to HPLC. Identity and purity of the peptides was confirmed by LCMS (Fig. S8).

### **General Procedure for Synthesis of Bicyclic Peptide**

To a solution of 5 mg of oxidized peptide in 500  $\mu$ L DMF, we added 100  $\mu$ L of a solution of **HADCAz** (1.2 eq) in DMF. We incubated the reaction for 2 h on a 55 °C bath and then diluted it to 2.5 mL with DMF. We further diluted the mixture by adding 2.5 mL of H<sub>2</sub>O and then added 1.2 equivalent of TCEP solution (25 mM, pH 8.0) in two portions in 15 min intervals. The pH of the mixture was carefully adjusted to 8 and the reaction mixture was incubated at r.t. for 45 min. We then acidified the reaction to pH 5 with 10% AcOH solution and purified the product by HPLC. The identity of the peptides was confirmed by HRMS and/or NMR (Figs. S2, S9-S13).

### **Kinetics and Switching Efficiency of HADCAz and Bicyclic Peptides.**

To quantify switching efficiency of the azobenzene, we injected 5  $\mu$ L of a 100  $\mu$ M solution of the Azb containing compound to HPLC. We repeated the injections 0, 11, 22, 60, 120, 240 and 720 min after irradiation by 365 nm light. The absorption of the peaks was measured at 420 nm (isosbestic point) (Figs. S1, S5 and S6).

### **Simulation Methods**

Molecular dynamics (MD) simulations were performed for four cyclic peptides (CP3a, CP3b, CP3c, and CP3d). For each peptide, two different initial structures were built using the Maestro 10.2 software of Schrödinger.<sup>1</sup> The topology file for each peptide was generated using the Schrödinger utility `ffld_server` and converted to the GROMACS format using the `ffconv.py` script.<sup>2</sup> All MD simulations in this study were performed using the GROMACS 4.6.7 suite<sup>3</sup> with OPLS 2005 force field and TIP4P water model.<sup>4</sup> The initial structure was first energy minimized for 1000 steps and then solvated in a cubic box of water molecules. The box size was chosen such that the minimum distance between the peptide and the box wall is 1.5 nm. Explicit counter ions were also added to neutralize the net charge of the system. With all heavy atoms of the peptide restrained, the solvated system was further energy minimized for 5000 steps.

Each initial structure was subjected to 100 independent runs starting from different initial geometries. With all the heavy atoms of the peptide remain restrained to their initial coordinates; a 50 ps NVT (isochoric-isothermal) equilibration followed by a 50 ps NPT (isobaric-isothermal) equilibration at 300K/1atm was first implemented for each run to adjust the solvent density. The well-equilibrated system then underwent a simulated annealing process in the NVT ensemble, during which the system temperature was first increased to 600 K within 500 ps and maintained at 600 K for an additional 500 ps. The temperature was then decreased gradually to 300 K within 1 ns. During the simulated annealing, the position restraints for the peptide were removed; the azobenzene motif and the oxime bond were harmonically restrained to the *cis* configuration with a force constant of 1000 kcal/mol/rad<sup>2</sup>. In all the simulations, the temperature was regulated using the v-rescale thermostat<sup>5</sup> with a coupling time constant of 0.1 ps. To avoid the “hot solvent/cold solute” artifact,<sup>6,7</sup> two separated thermostats were applied to the solvent (water and ions) and the peptide. The pressure was maintained using the isotropic Parrinello-Rahman barostat<sup>8</sup> with a coupling time of 2.0 ps and a compressibility of  $4.5 \times 10^{-5}$  bar<sup>-1</sup>. All bonds were constrained with the LINCS algorithm<sup>9</sup> allowing a 2 fs time step to be used with the leapfrog integrator.<sup>10</sup> The non-bonded interactions (Lennard-Jones and electrostatic) were truncated at 1.0 nm. Long-range electrostatic interactions were treated using the Particle Mesh Ewald (PME) summation method.<sup>11</sup> A long-range analytic dispersion correction was applied to both the energy and pressure to account for the truncation of Lennard-Jones interactions.<sup>12</sup>

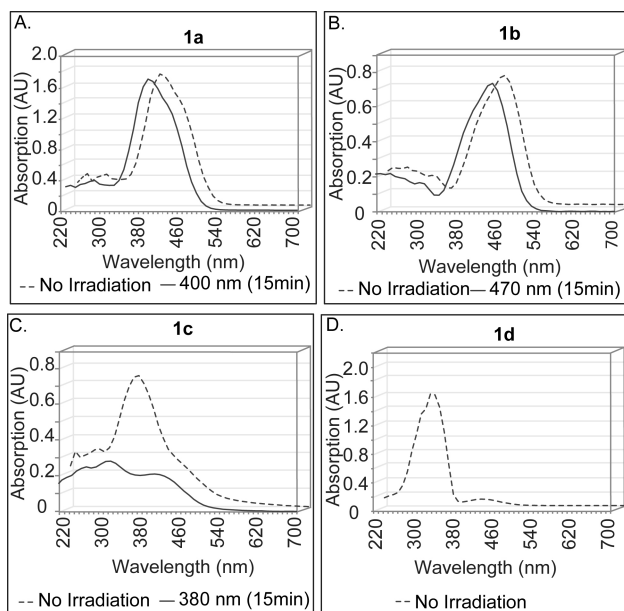

Fig. S1 (A)-(D) Absorption spectra of compounds 1a-1d before and after irradiation.

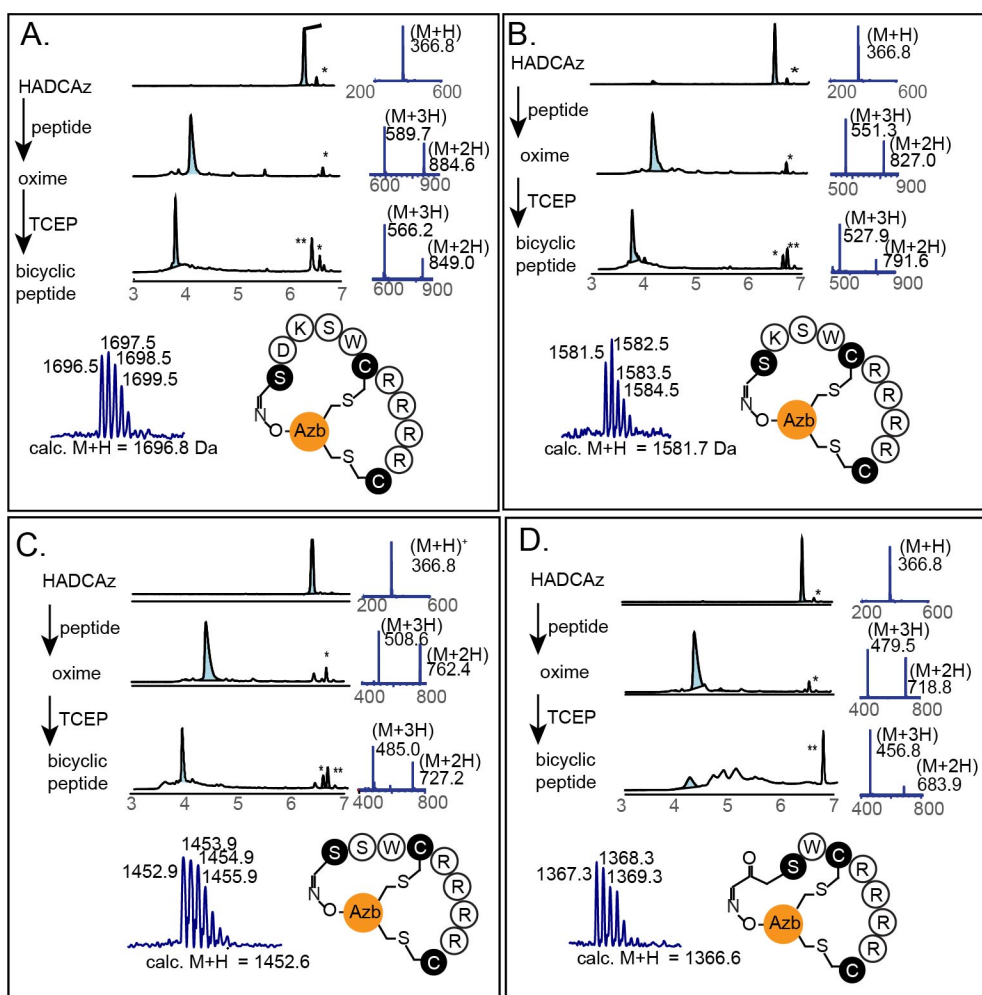

Fig. S2 (A)-(D) LCMS traces confirm the synthesis of bicyclic peptides 3a-3d. MALDI-MS shows the isotopic pattern for the product (for high resolution MS see Fig. S9). \* indicates **HADCAz** adduct of reaction with formaldehyde (DMF impurity). \*\* indicates **HADCAz** byproducts with unidentified structure.

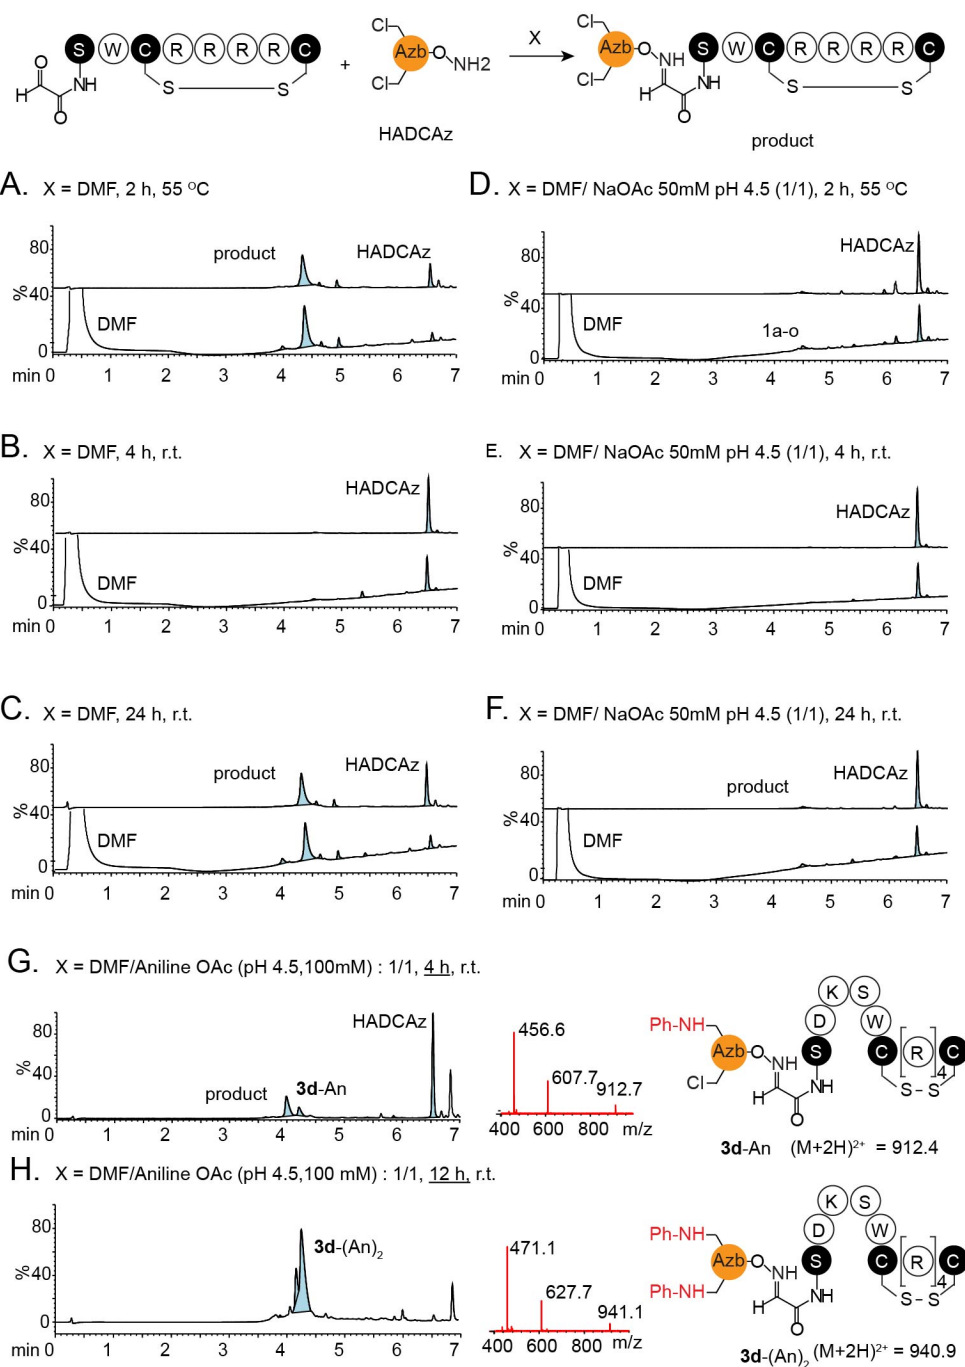

Fig. S3 Optimization of the formation of oxime bond with and without aniline catalyst (SDKSWRRRRC peptide sequence was used in the latter case). (A)-(F) Formation of products is undetectable in solvents containing water, but occurs efficiently in pure DMF. (G)-(H) Addition of aniline resulted in undesired substitution of one or both chlorides in the linker.

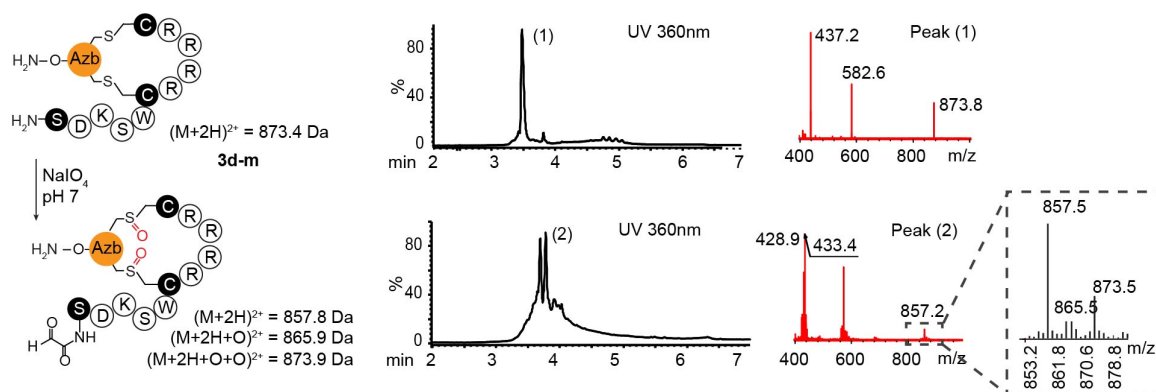

Fig. S4 Oxidation of 4 results in a mixture of byproducts, including oxidized sulfides.

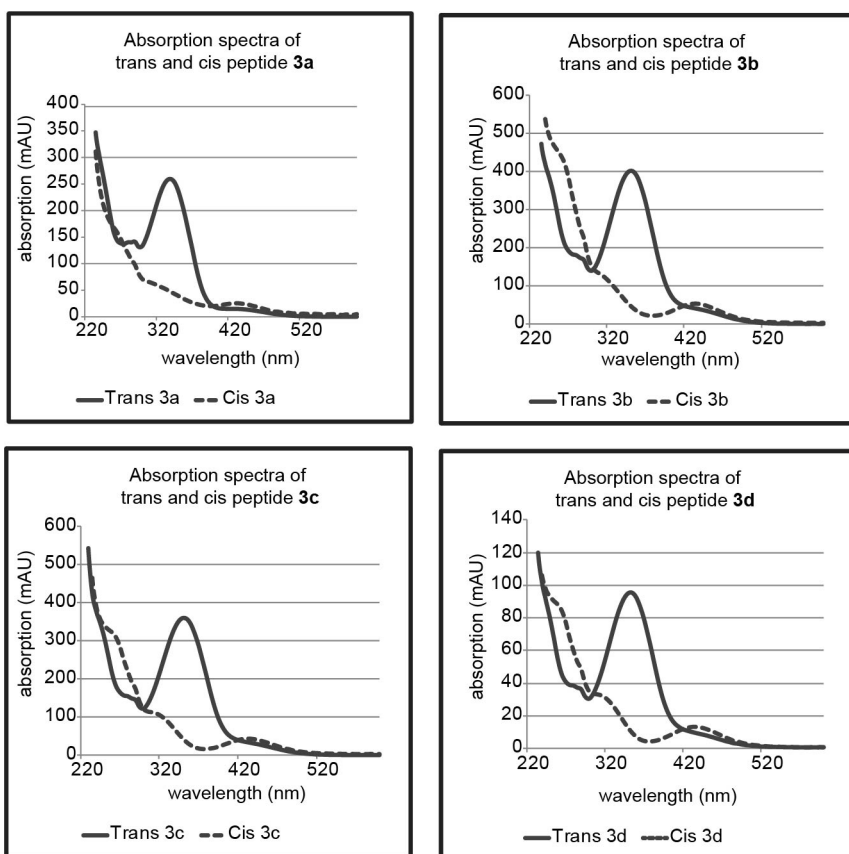

Fig. S5 Absorption spectra of 3a-3d before and after irradiation with 365 nm light.

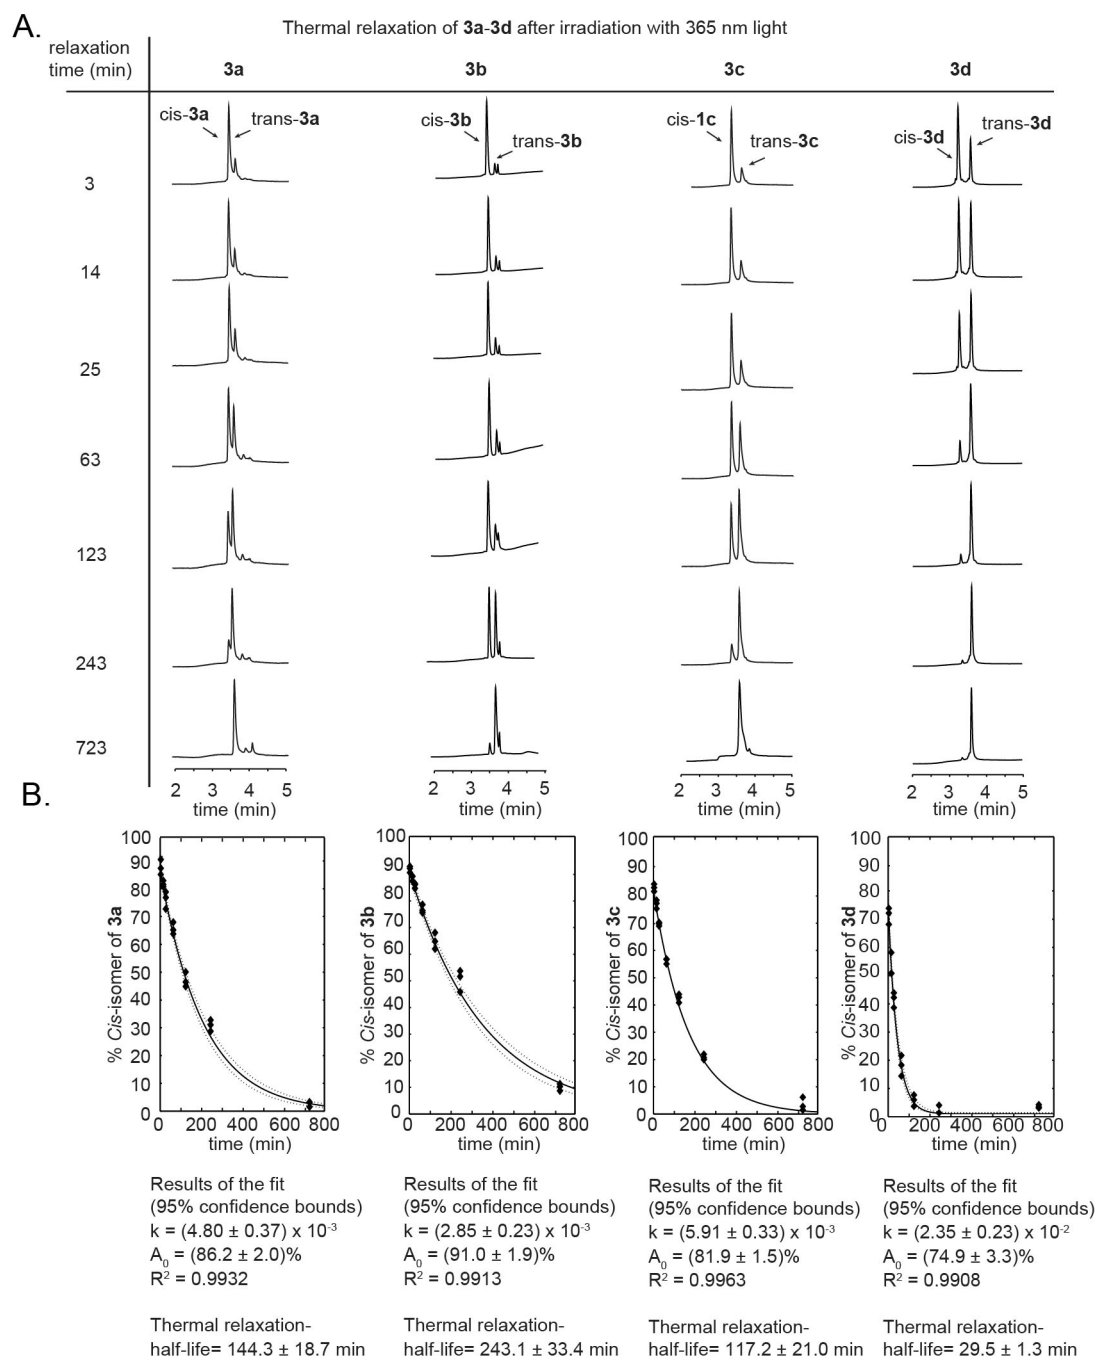

Fig. S6 Kinetics of thermal relaxation for **3a-3d**. (A) LCMS traces for thermal relaxation of **3a-3d** after irradiation with 365 nm light. (B) Fitting the kinetic data in a first order kinetic model determined the relaxation rate, *cis*-ratio at photostationary state ( $A_0$ ) and relaxation half-life.

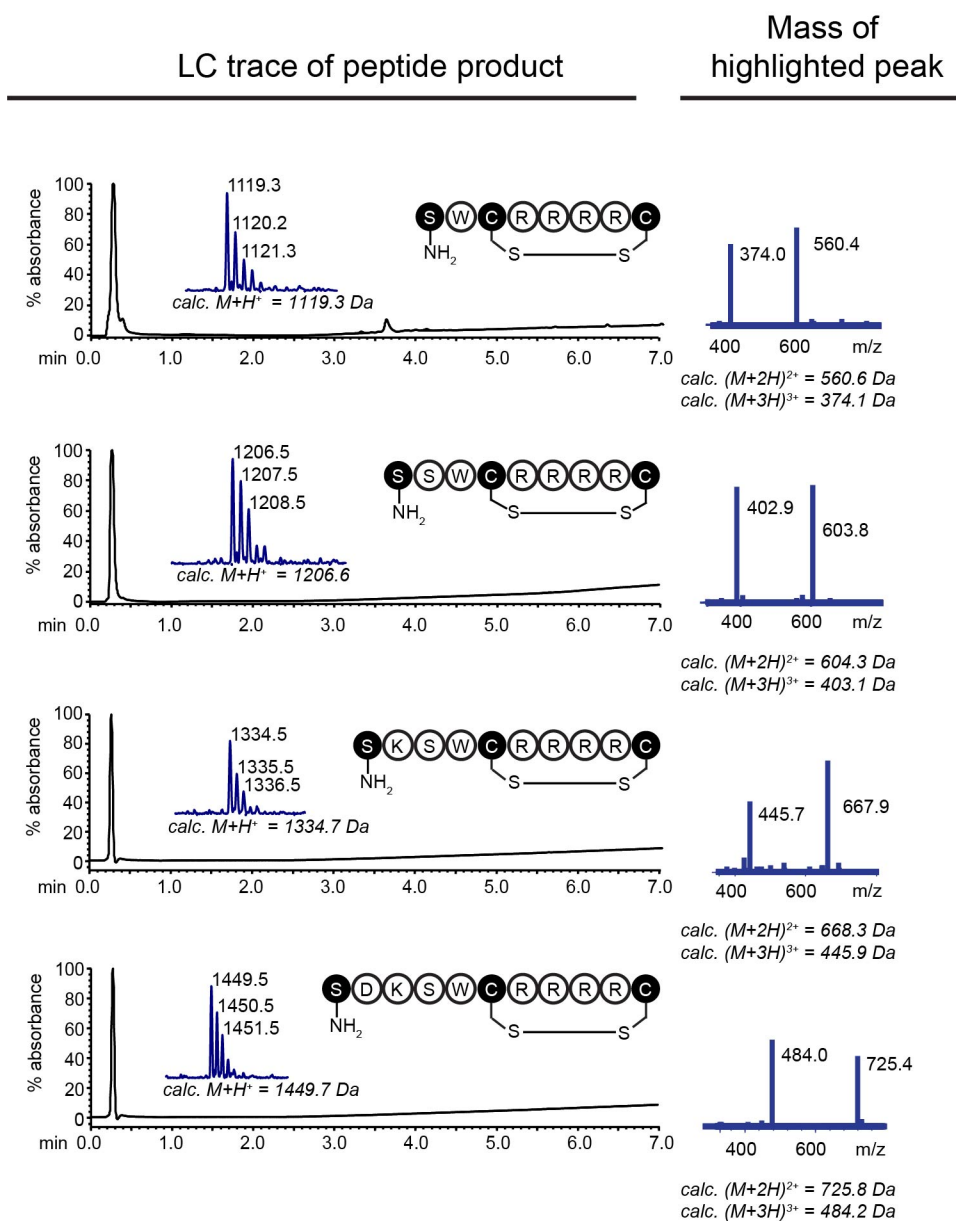

Fig. S7 LCMS traces of disulfide peptides. MALDI-MS results show the isotope pattern.

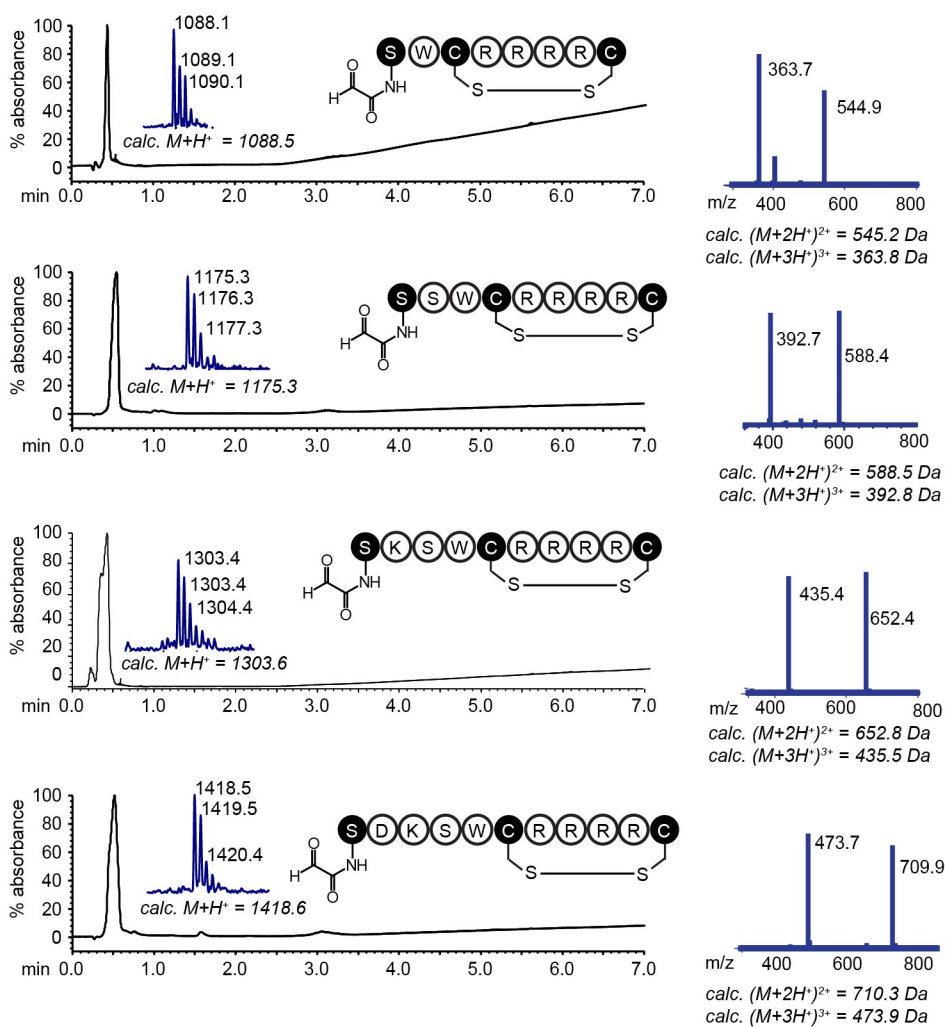

Fig. S8 LCMS traces of the peptides after oxidation of the N-terminal serine with sodium periodate. MALDI-MS results shows the isotope pattern.

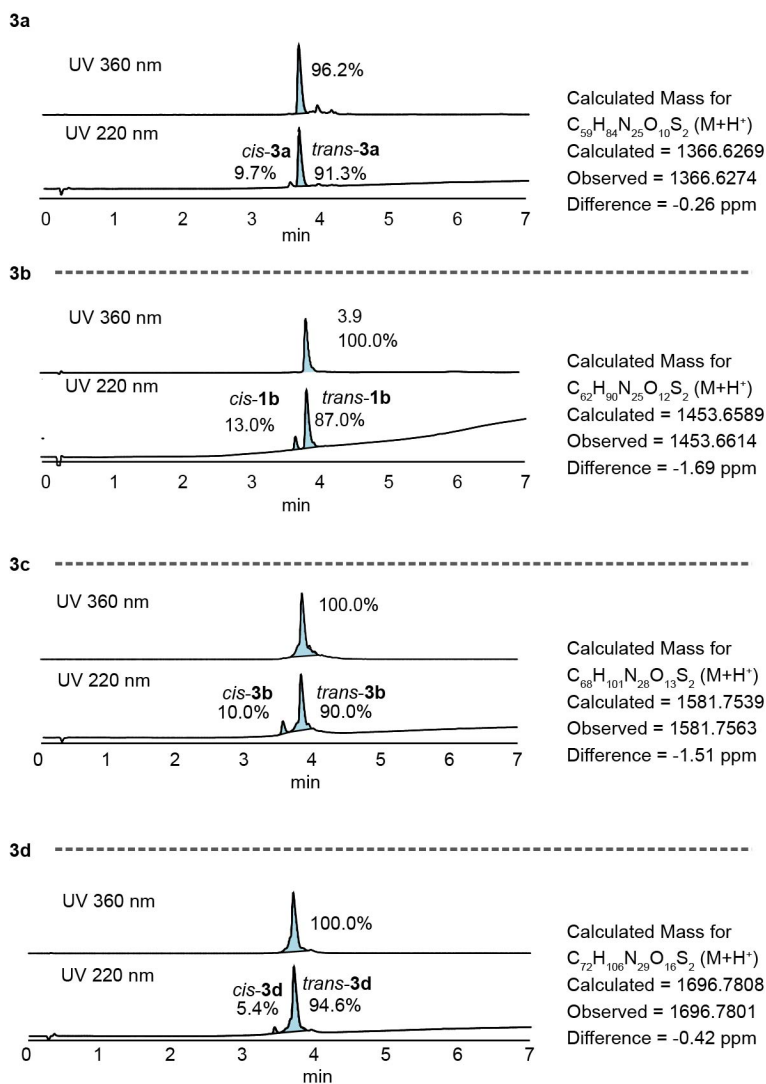

Fig. S9 LCMS traces of purified peptide **3a-3d** and HRMS characterization. The *cis*-isomer is visible when measured at 220 nm, but is not detectable at 360 nm chromatogram, because of low absorption of **Azb** at 360 nm for *cis* form.

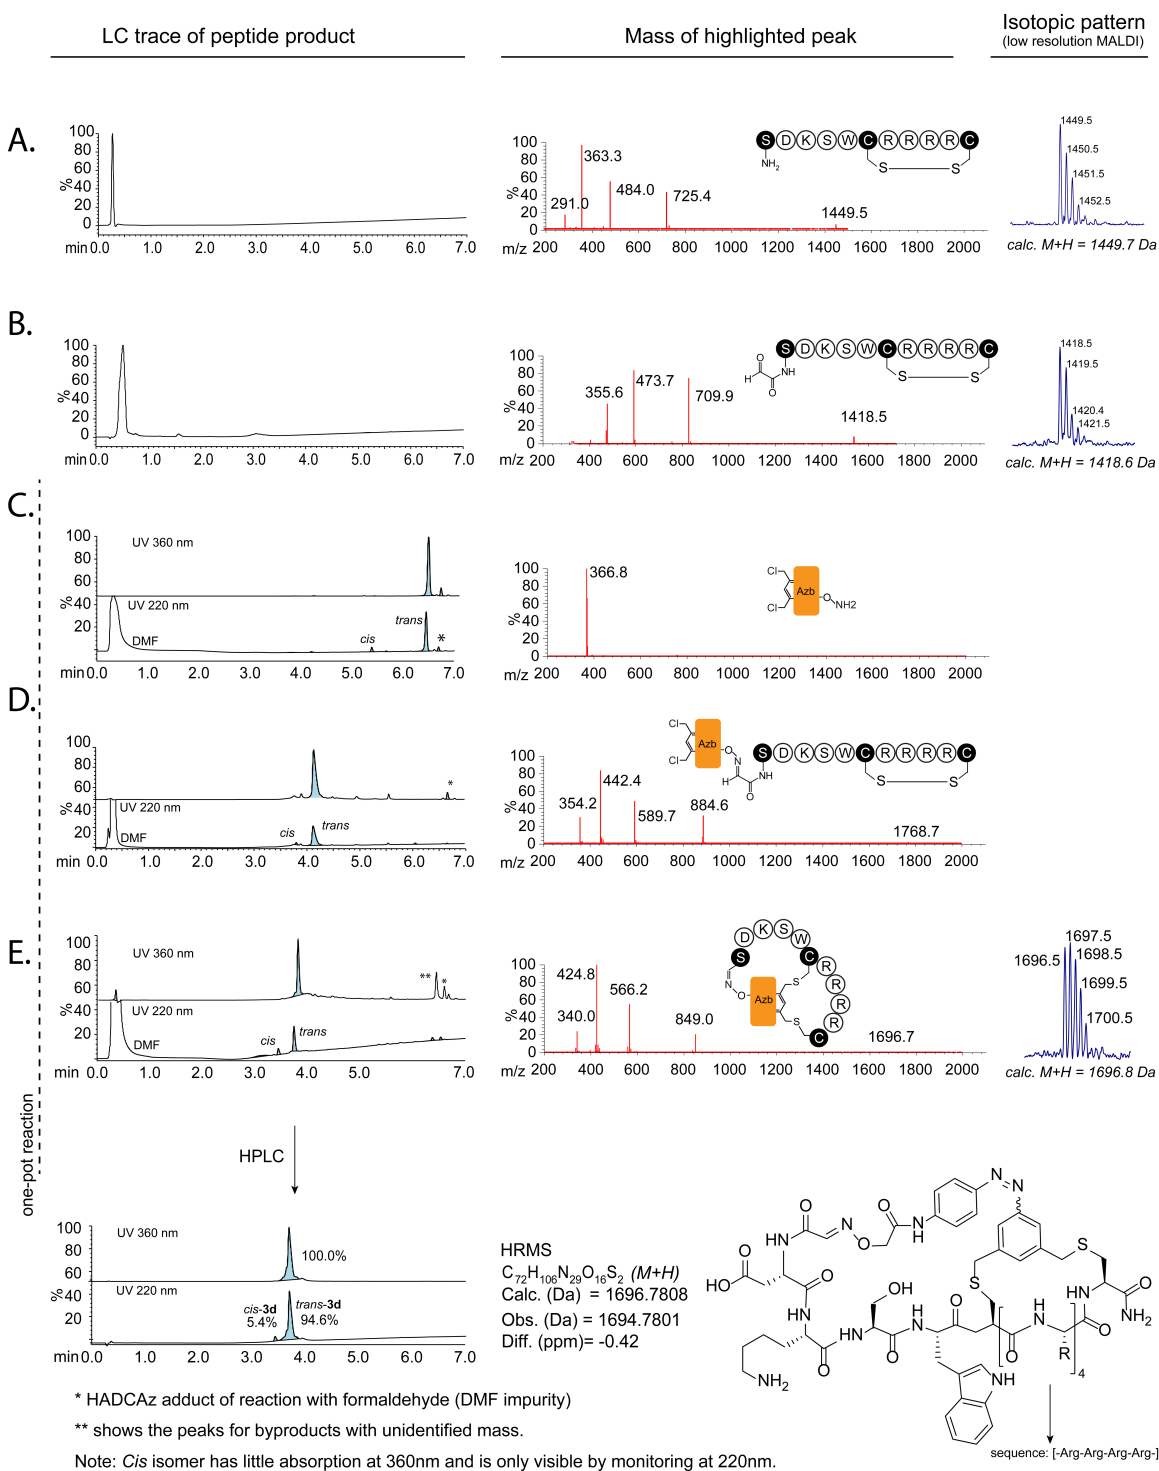

Fig. S10 LCMS traces of the reaction between the peptide SDKSWCRRRRC and **HADCAz**. (A) LCMS trace of the purified peptide SDKSWCRRRRC. (B) SDKSWCRRRRC after oxidation of the N-terminal serine with sodium periodate. The periodate oxidation does not break the disulfide bond. (C) LCMS trace of **HADCAz** prior to reaction. (D) An oxime bond is formed after reaction of **HADCAz** with the oxidized peptide. (E) LCMS trace of the bicyclized peptide after reduction with TCEP.

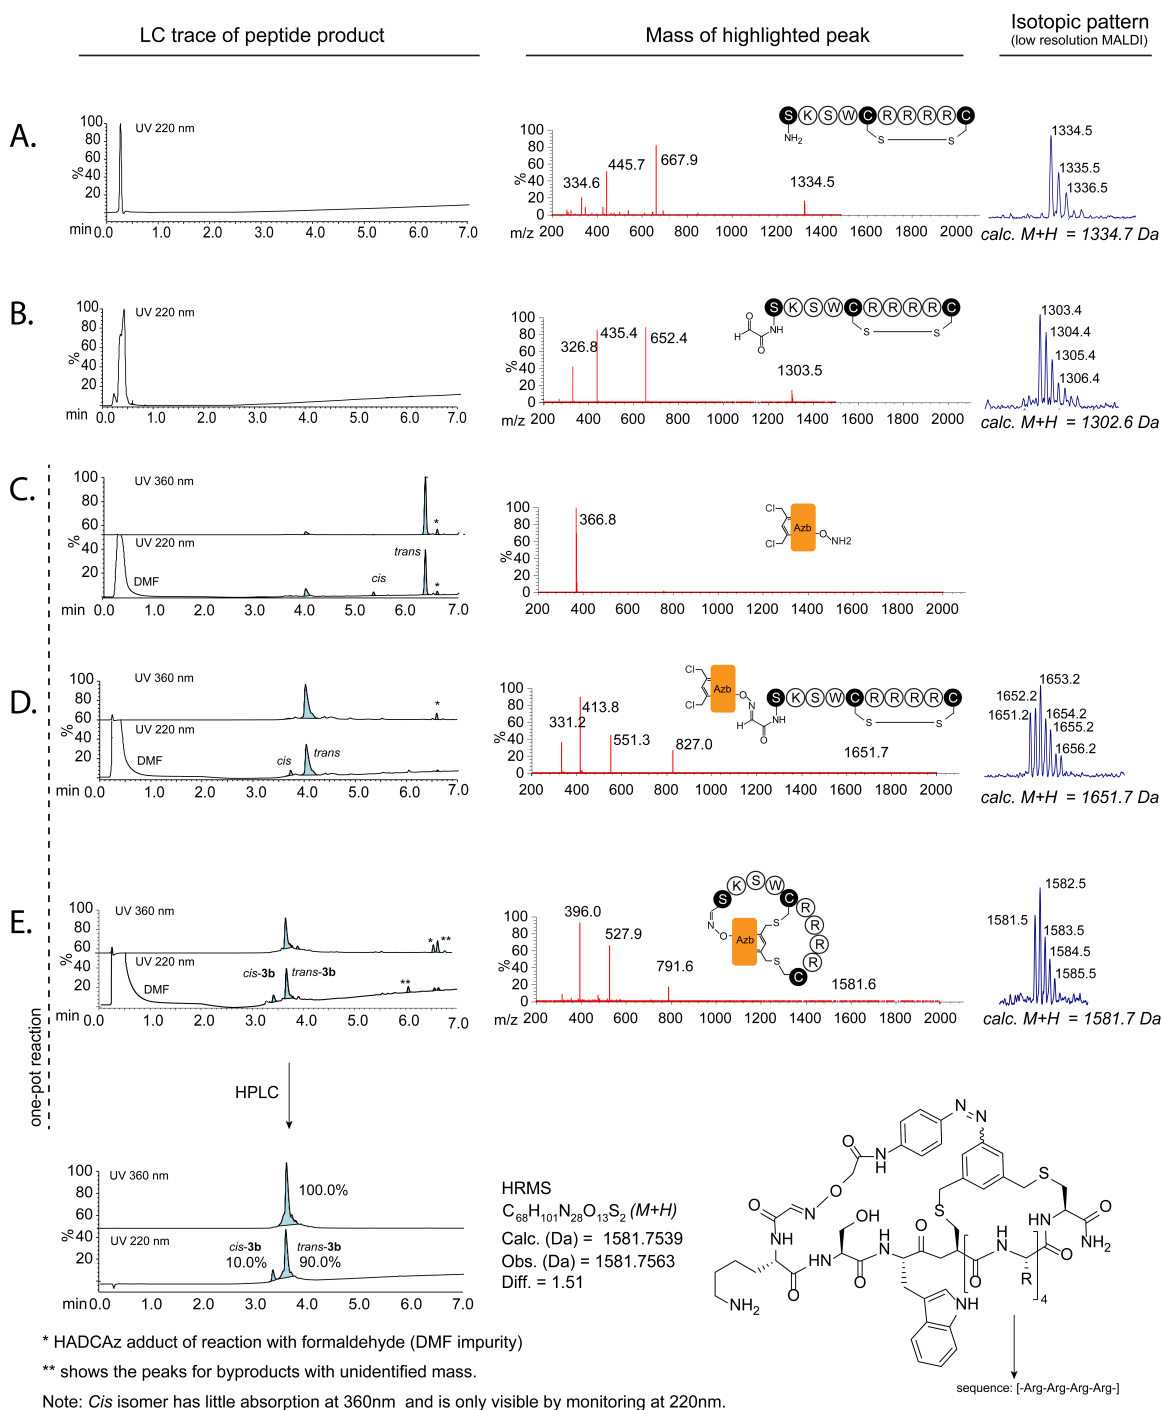

Fig. S11 LCMS traces of the reaction between the peptide SKSWCRRRRC and **HADCAz**. (A) LCMS trace of the purified peptide SKSWCRRRRC. (B) SKSWCRRRRC after oxidation of the N-terminal serine with sodium periodate. The periodate oxidation does not break the disulfide bond. (C) LCMS trace of **HADCAz** prior to reaction. (D) An oxime bond is formed after reaction of **HADCAz** with the oxidized peptide. (E) LCMS trace of the bicyclized peptide after reduction with TCEP.

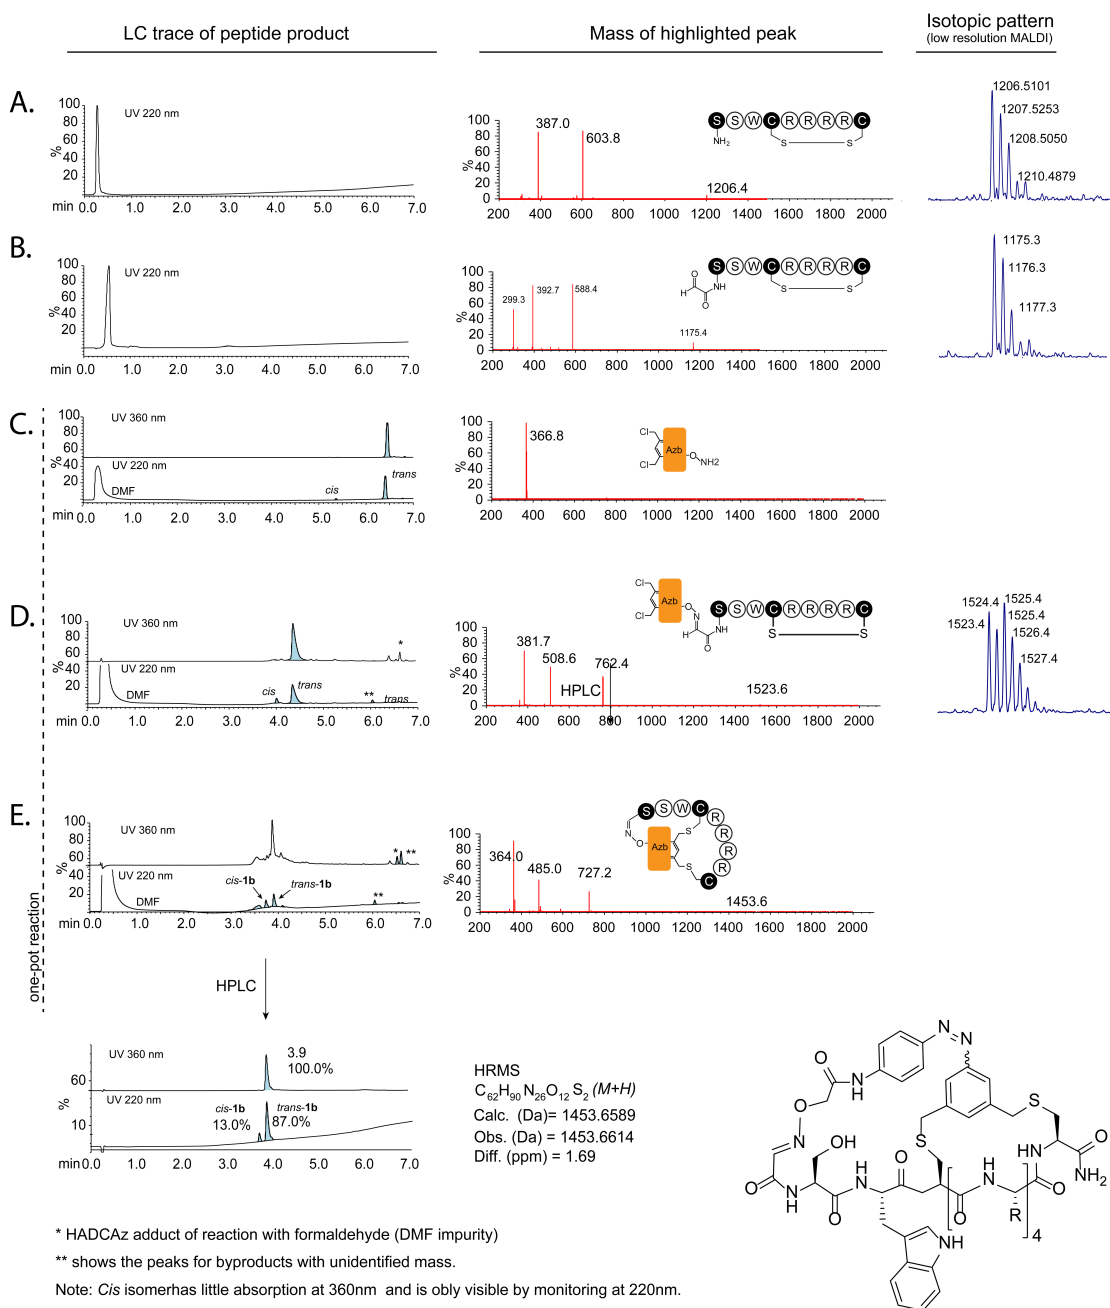

Fig. S12 LCMS traces of the reaction between the peptide SSWCRRRRC and **HADCAz**. (A) LCMS trace of the purified peptide SSWCRRRRC. (B) SSWCRRRRC after oxidation of the N-terminal serine with sodium periodate. The periodate oxidation does not break the disulfide bond. (C) LCMS trace of **HADCAz** prior to reaction. (D) An oxime bond is formed after reaction of **HADCAz** with the oxidized peptide. (E) LCMS trace of the bicyclized peptide after reduction with TCEP.

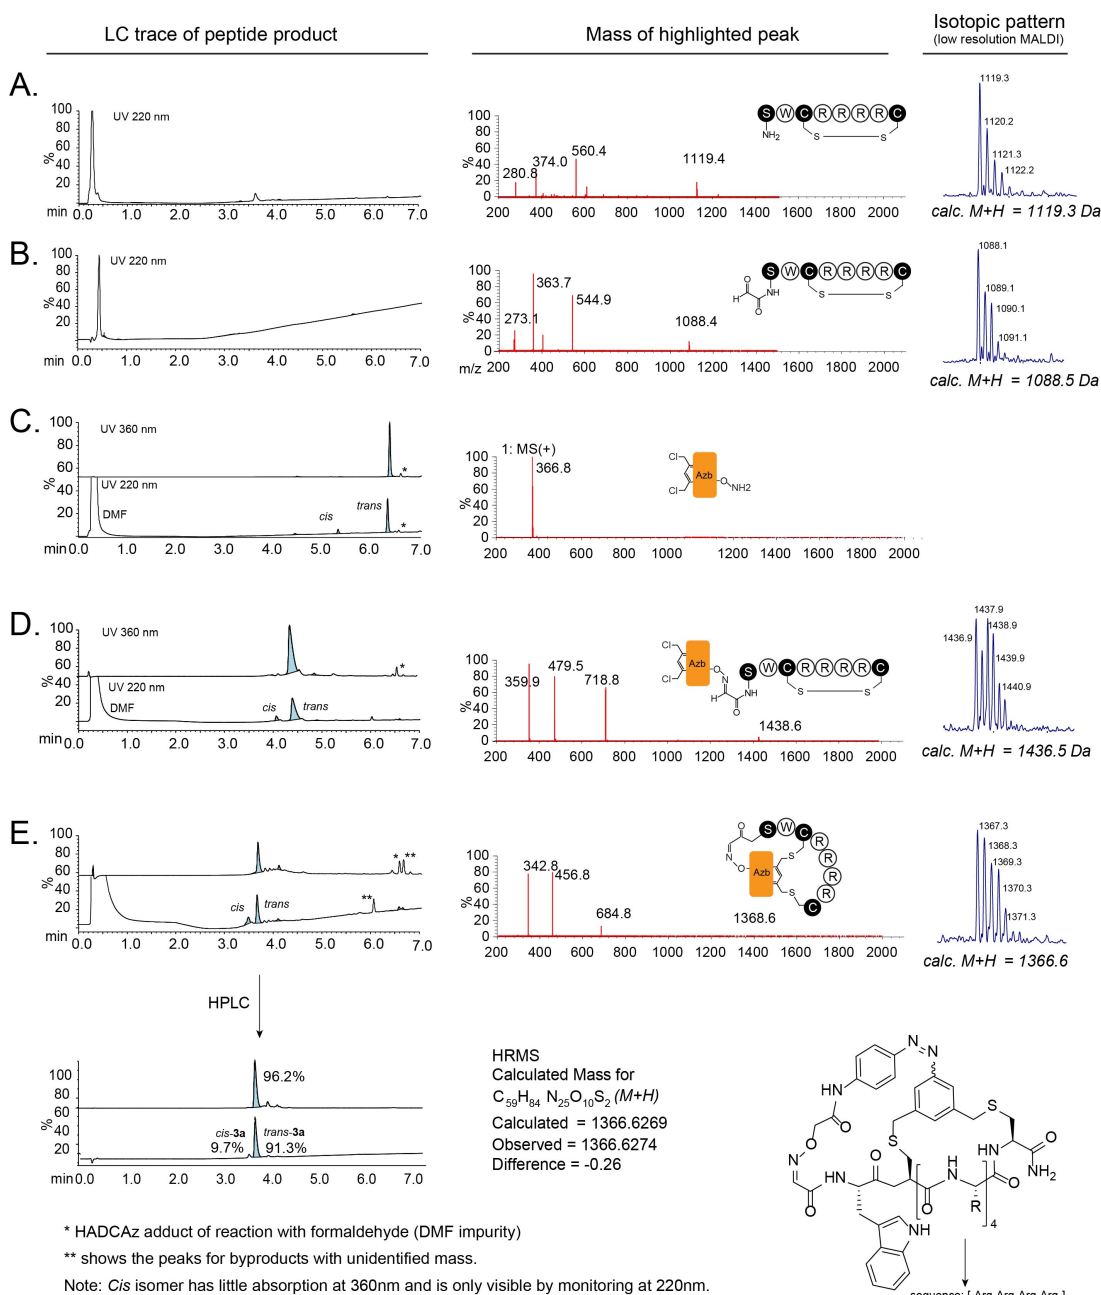

Fig. S13 LCMS traces of the reaction between the peptide SWCRRRRC and **HADCAz**. (A) LCMS trace of the purified peptide SWCRRRRC. (B) SWCRRRRC after oxidation of the N-terminal serine with sodium periodate. The periodate oxidation does not break the disulfide bond. (C) LCMS trace of **HADCAz** prior to reaction. (D) An oxime bond is formed after reaction of **HADCAz** with the oxidized peptide. (E) LCMS trace of the bicyclized peptide after reduction with TCEP.

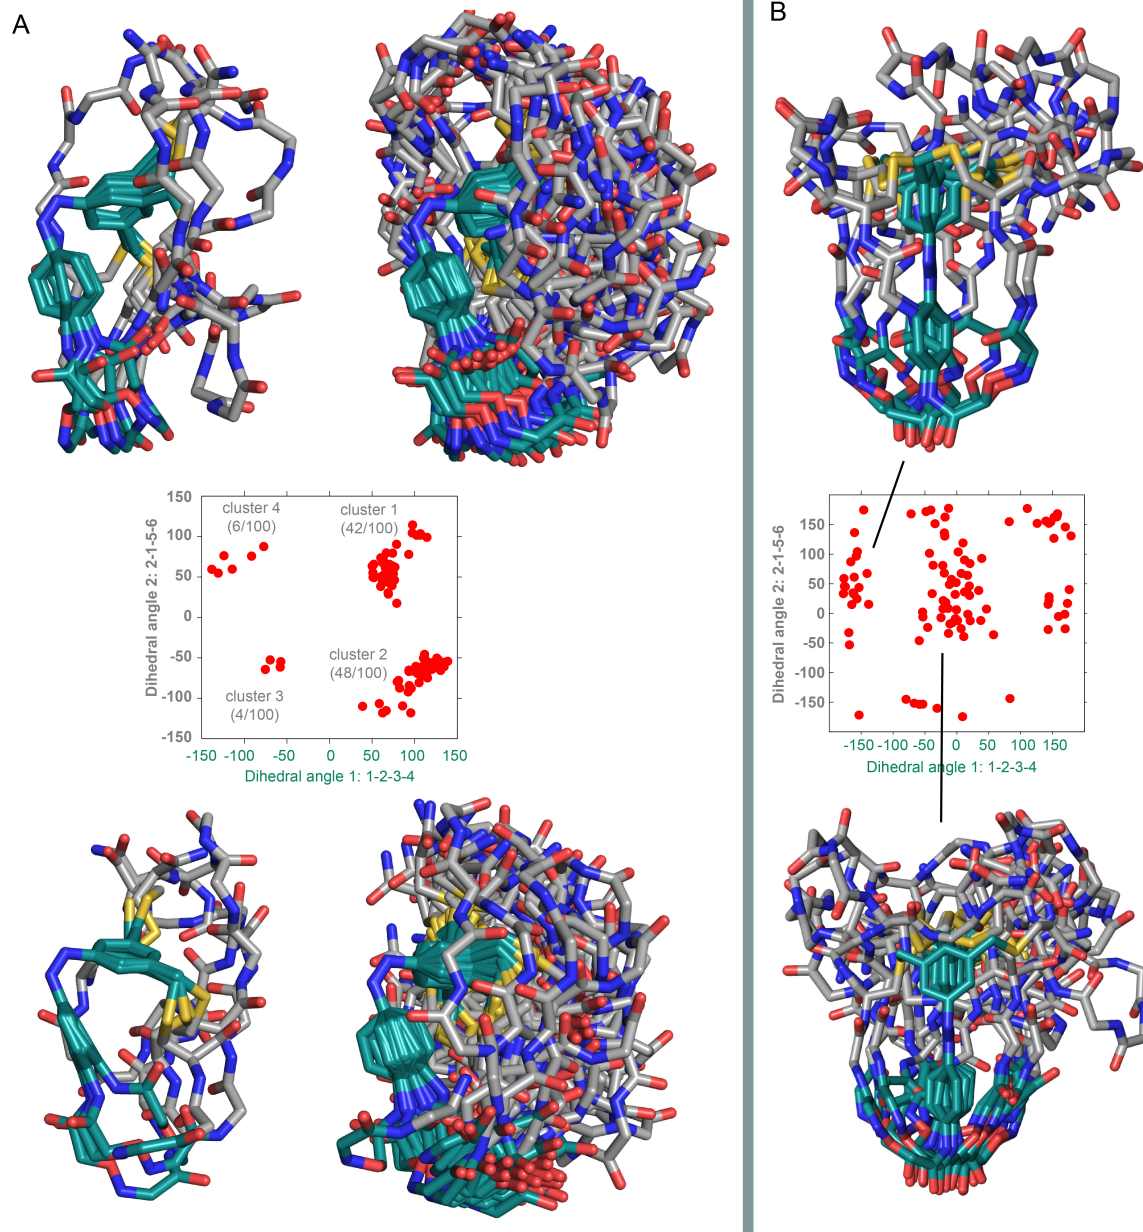

Fig. S14 The structures of both **HADCAz** and peptide backbone in (A) light **3a** and (B) dark **3a** diverged in 100 simulations (see Movies S1 and PBD files in *Derda\_PDB.zip* in Supporting Information). In (A) the images represent all structures from each cluster; (B) shows 10 representative structures from each "cluster". In all cases, the structures are grouped in space to overlay N=N bond and maximize the overlay of the azobenzene core.

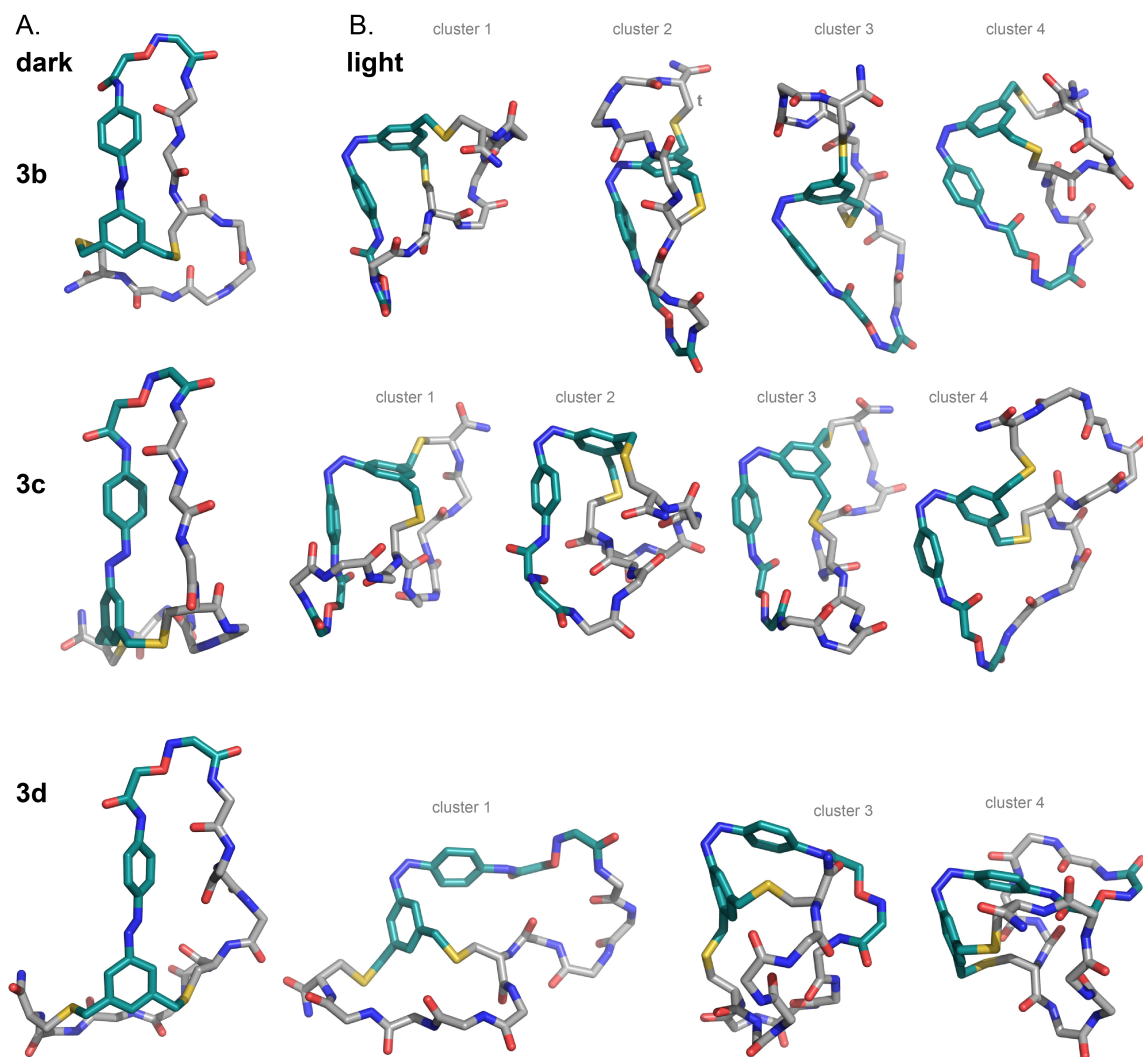

Fig. S15 (A) Representative structure of dark **3b**, **3c**, **3d** and (B) four representative structures from four cluster of light **3b**, **3c**, **3d** obtained after 100 simulations (see PBD files in *Derda\_PDB.zip* in Supporting Information).

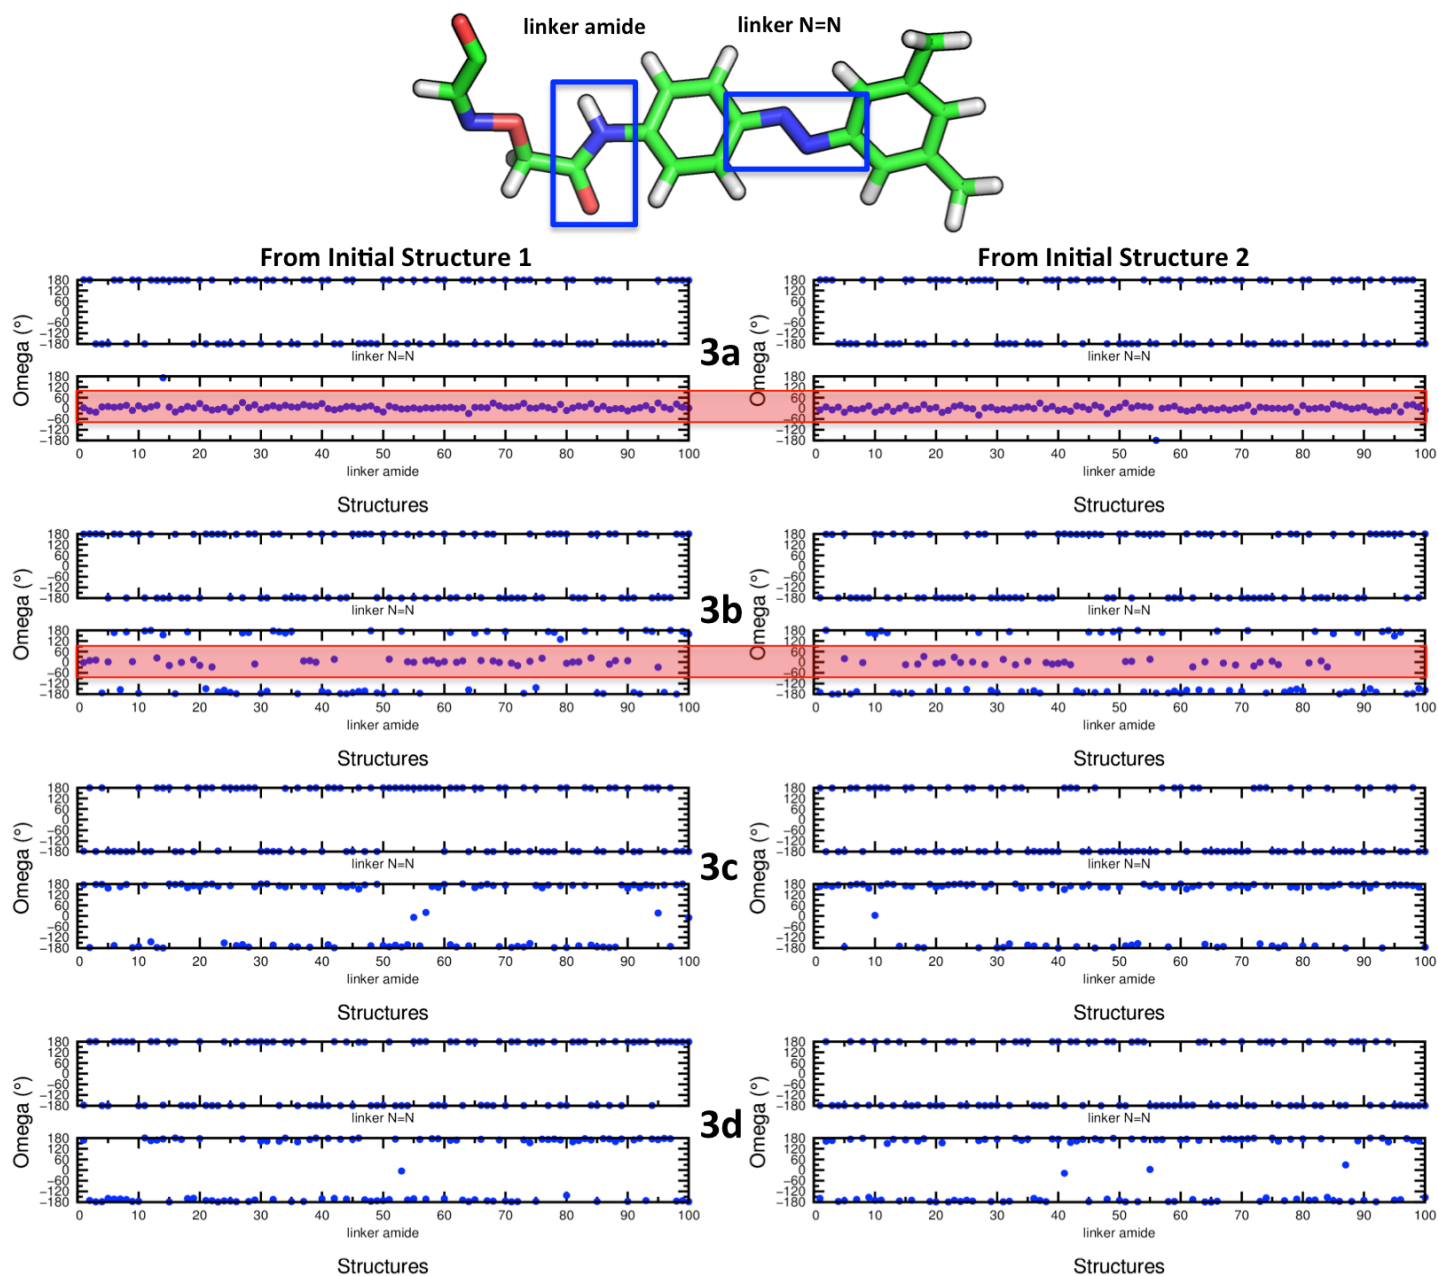

Fig. S16 Omega dihedral plot of the azobenzene N=N bond (top plot in each group) and the linker amide bond (bottom plot in each group) for dark **3a**, **3b**, **3c**, and **3d**. The dihedral angle of  $0^\circ$  in **3a** indicates *cis* conformation of the amide bond. Each dot represent the result of a separate MD simulation.

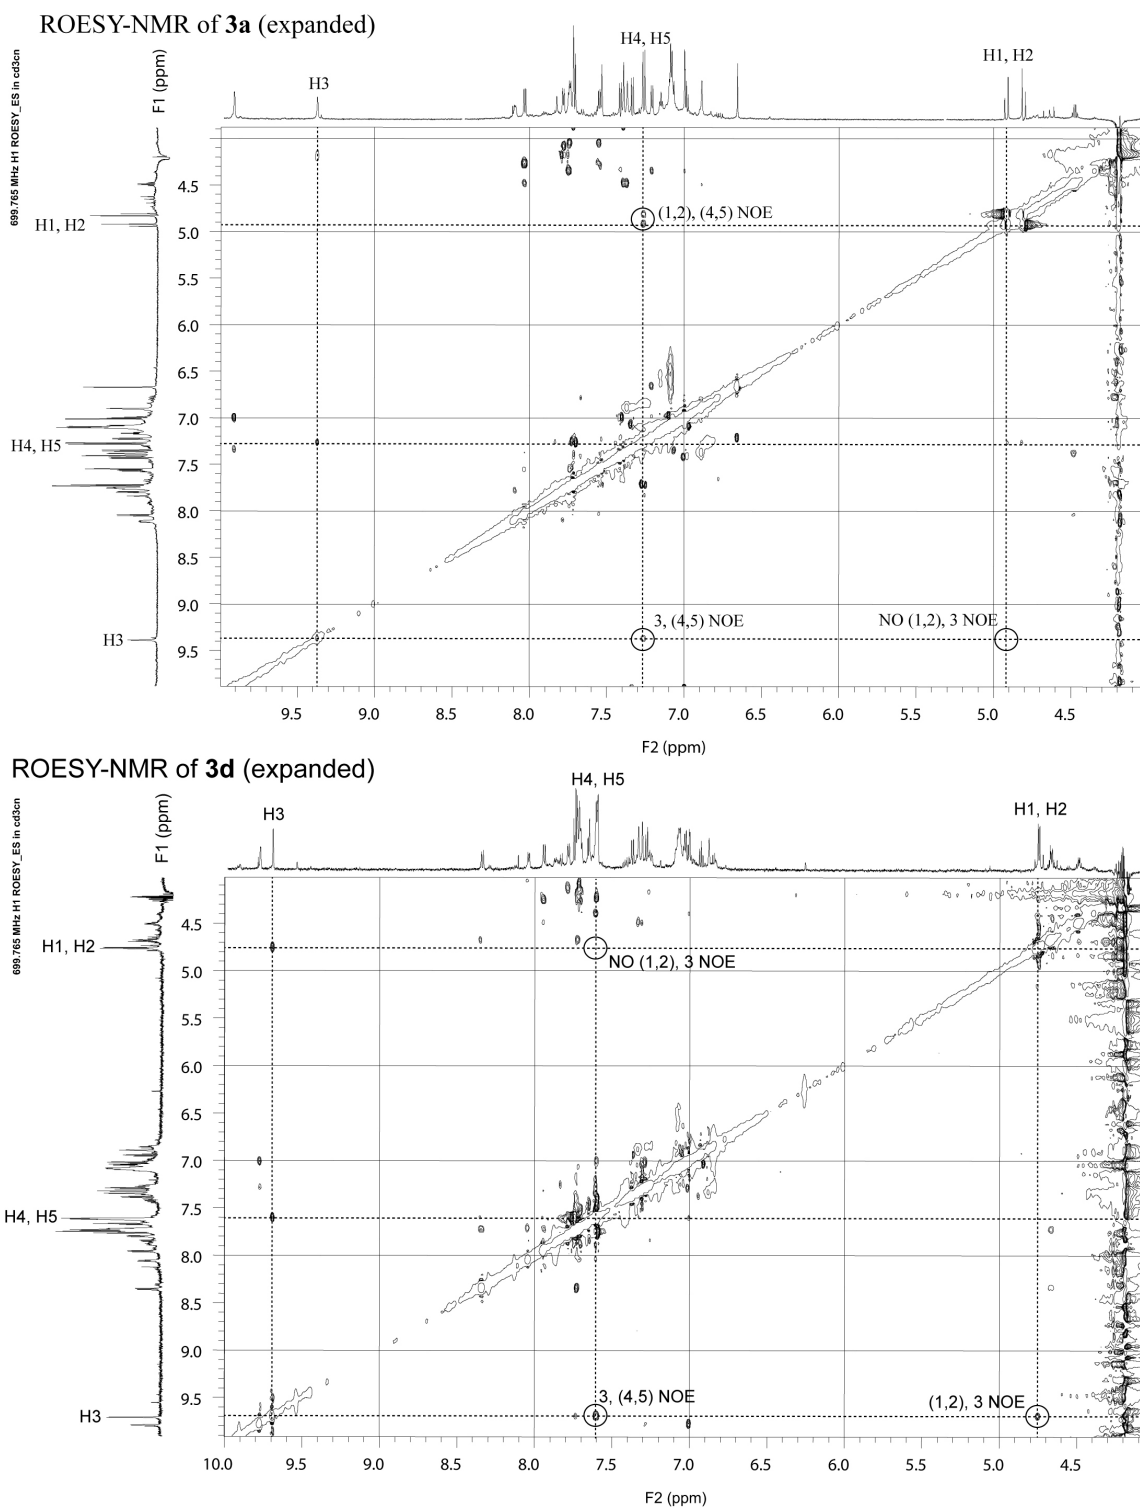

Fig. S17 Comparison of the NOE spectra of compounds **3a** and **3d** indicating presence of *cis* and *trans* aromatic amide bond respectively.

## NMR spectra of synthesized compounds

### $^1\text{H}$ -NMR of **1a** (asterisk shows residual EtOAc)

399.794 MHz H1 1D in cdcl3 (ref. to CDCl3 @ 7.26 ppm), temp 26.5 C -> actual temp = 27.0 C, autoxdb probe

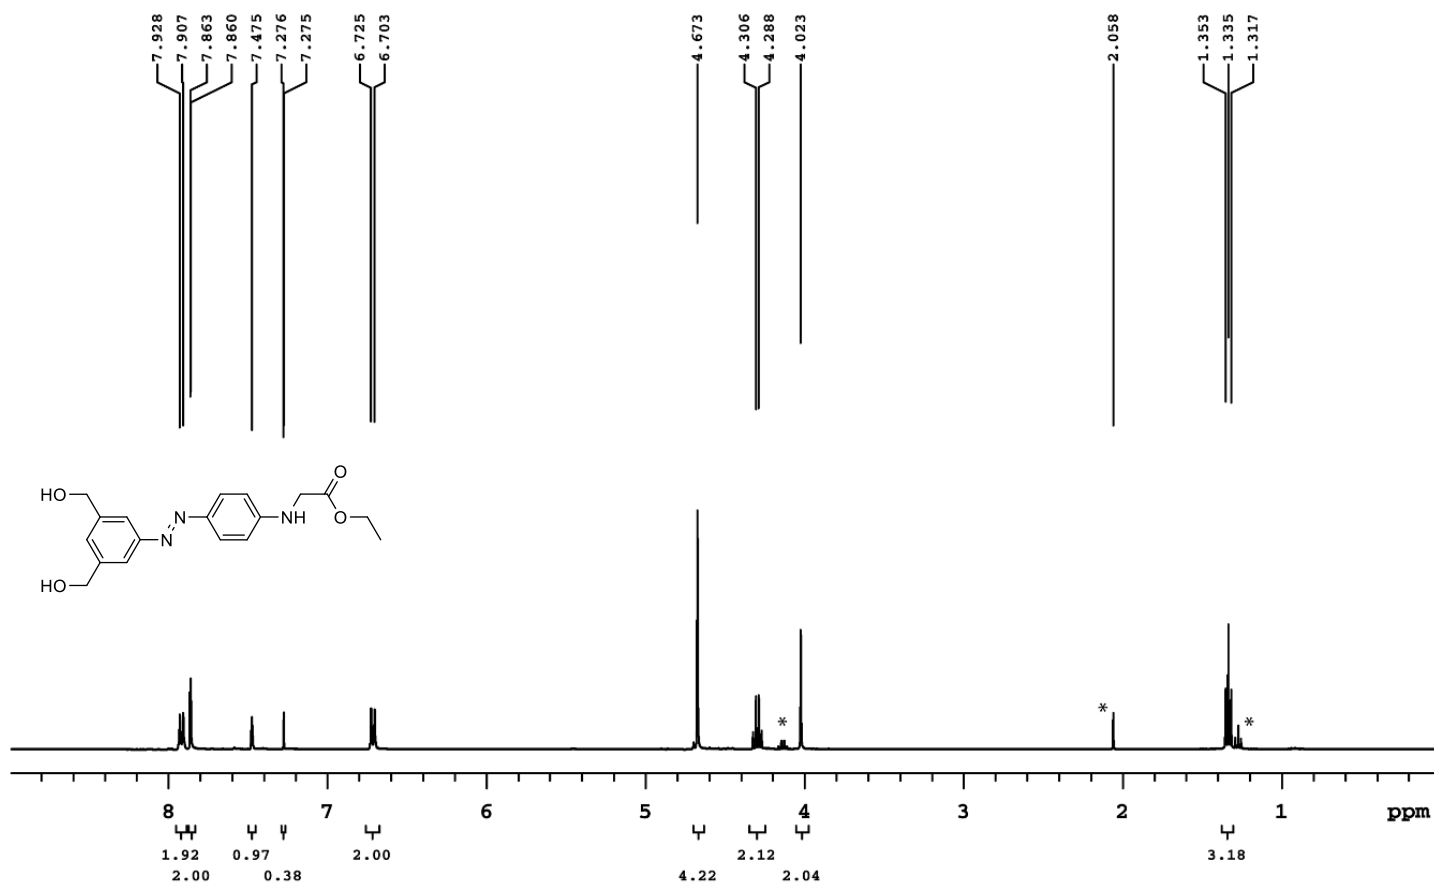

# <sup>13</sup>C-NMR of **1a**

100.539 MHz C13[H1] 1D in cdcl3 (ref. to CDCl3 @ 77.06 ppm), temp 26.5 C -> actual temp = 27.0 C, autoxdb probe

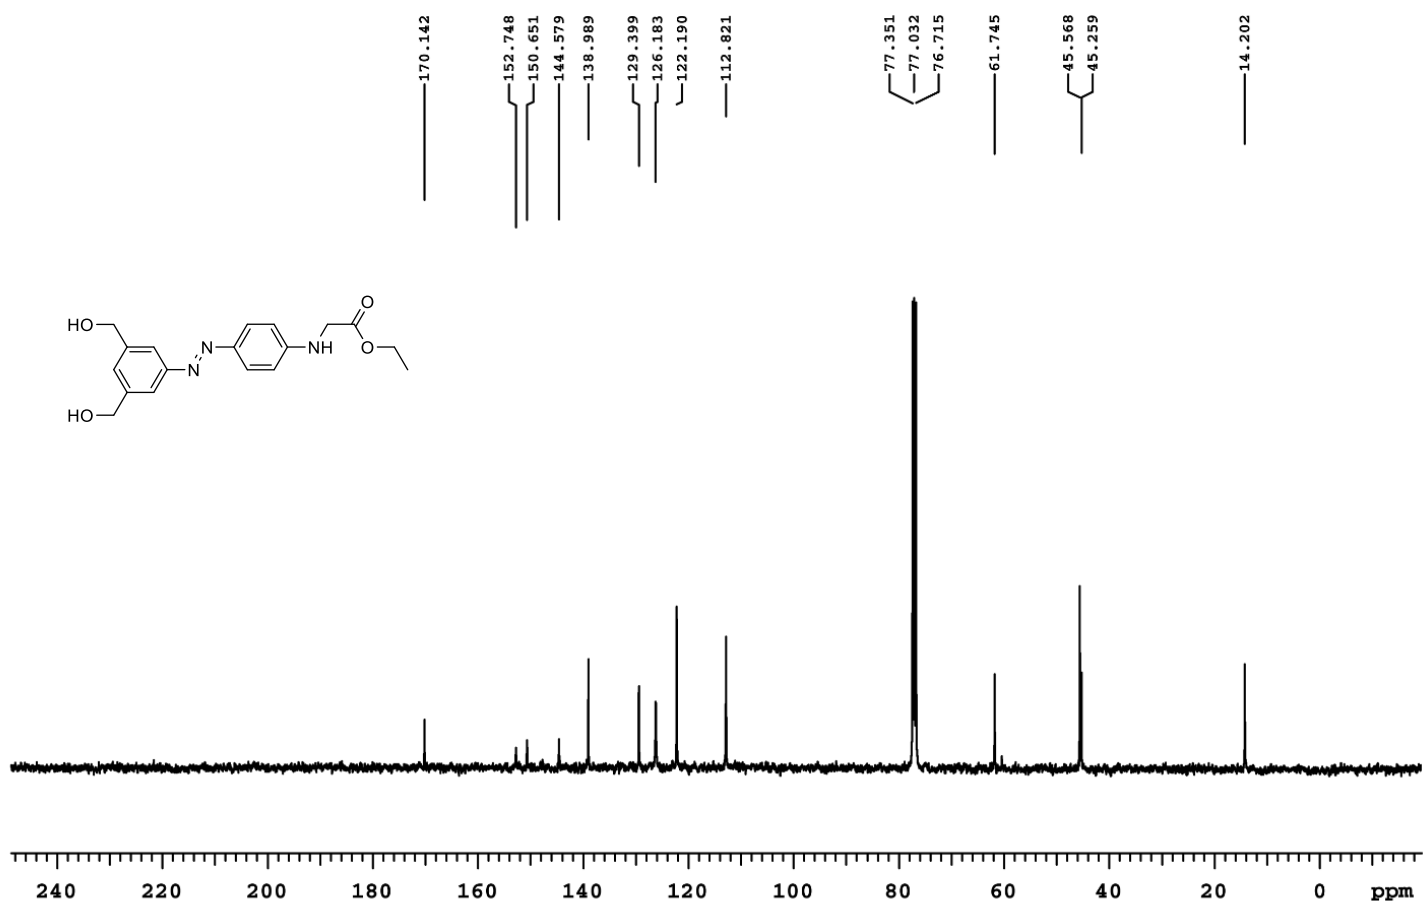

# <sup>1</sup>H-NMR of **1a'**

399.796 MHz H1 1D in dms0 (ref. to DMSO @ 2.49 ppm), temp 26.5 C -> actual temp = 27.0 C, autoxdb probe

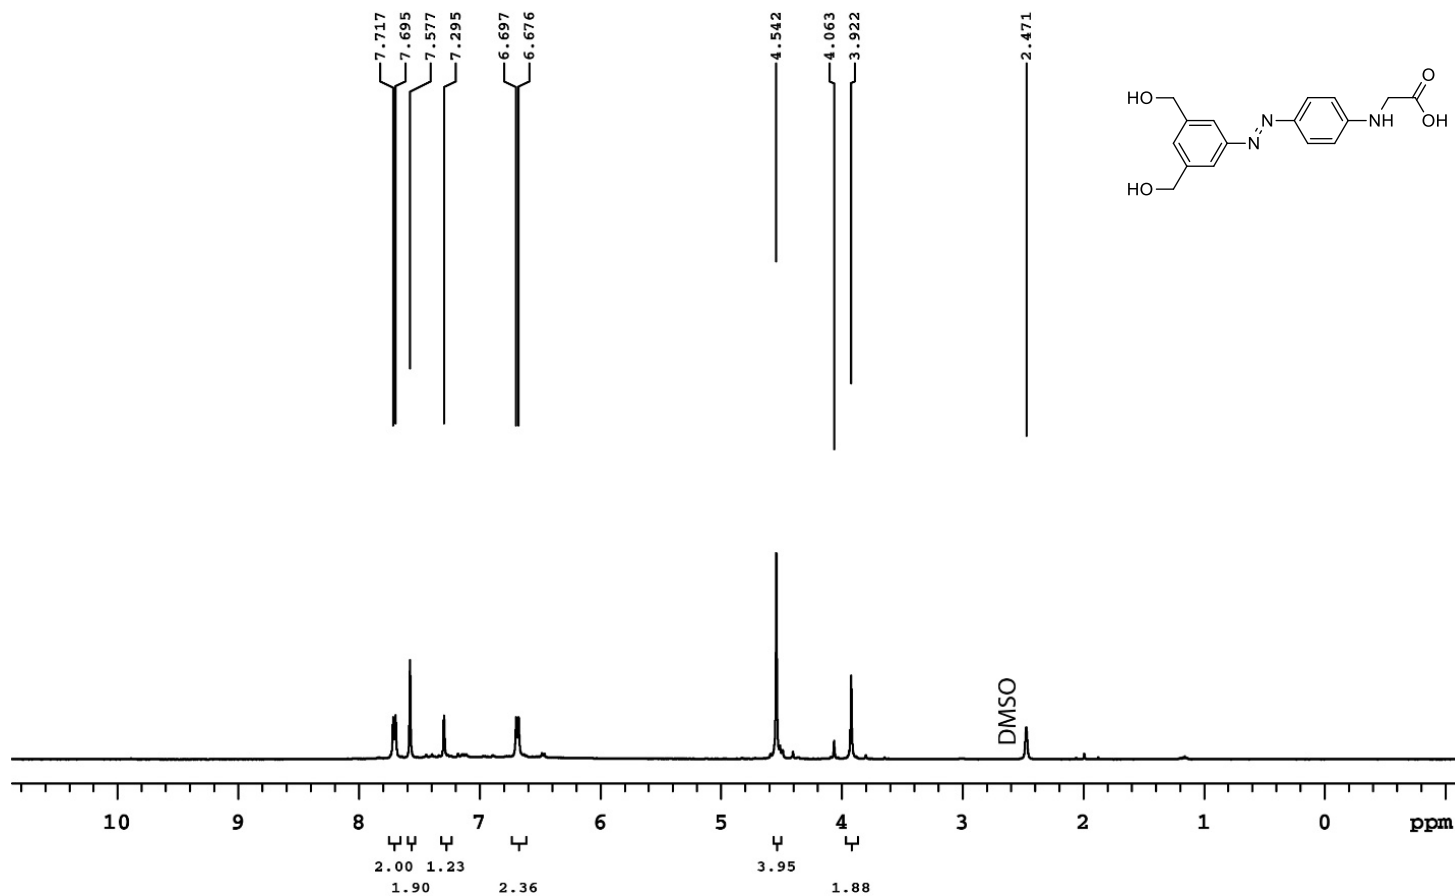

# <sup>13</sup>C-NMR of **1a'**

100.540 MHz C13[H1] 1D in cd3od (ref. to CD3OD @ 49.0 ppm), temp 26.5 C -> actual temp = 27.0 C, autoxdb probe

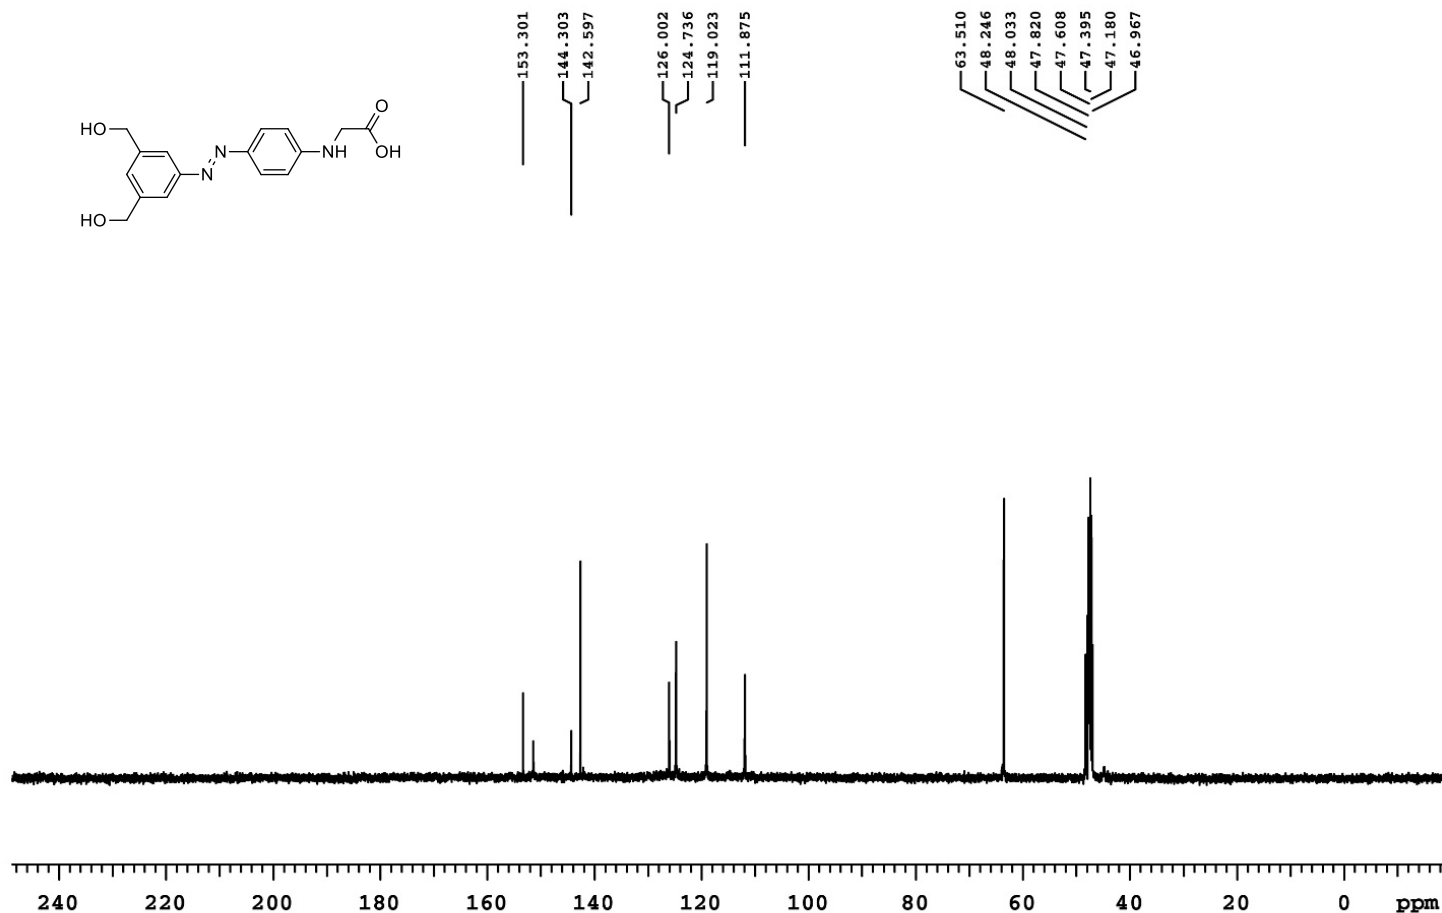

# <sup>1</sup>H-NMR of **1b**

399.796 MHz H1 1D in dms0 (ref. to DMSO @ 2.49 ppm), temp 26.5 C -> actual temp = 27.0 C, autotxdb probe

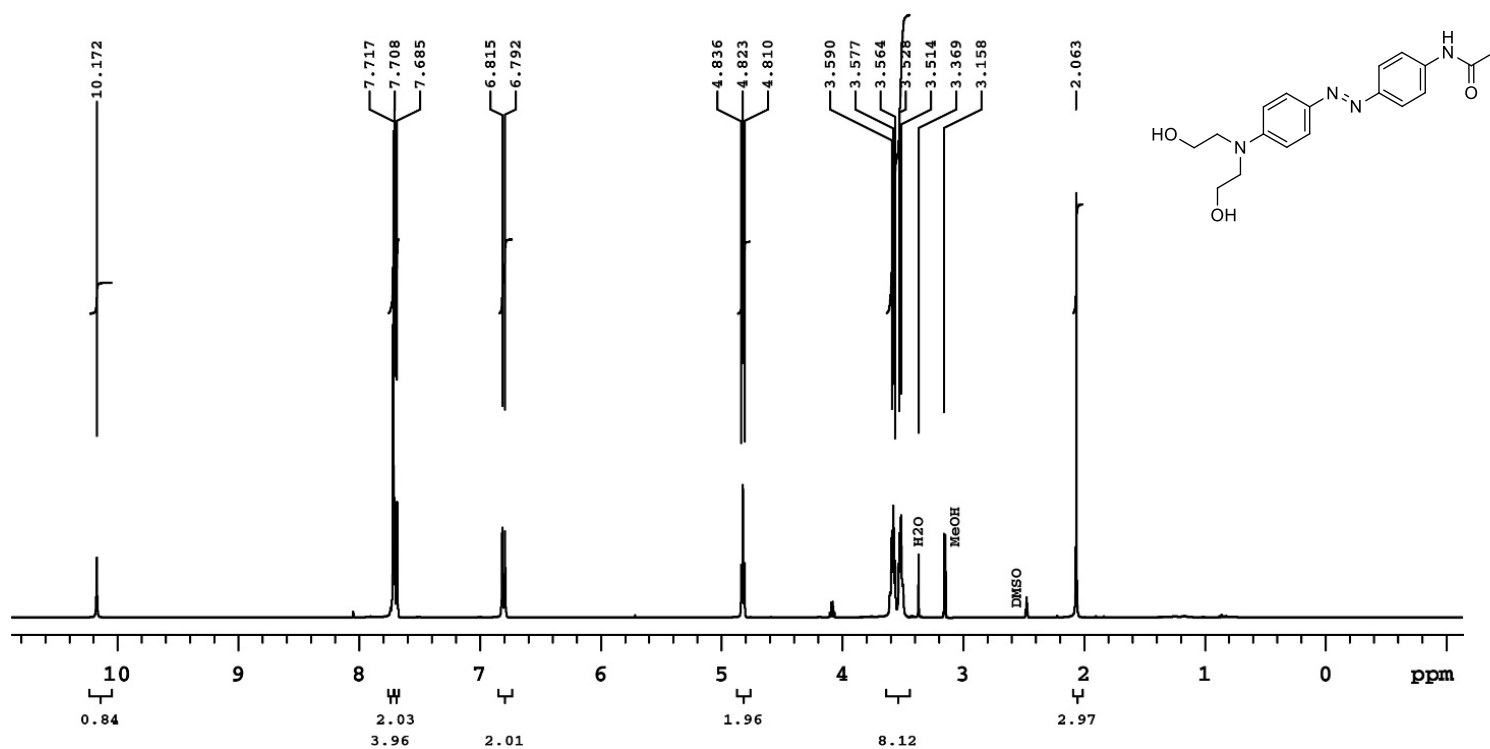

# <sup>13</sup>C-NMR of **1b**

100.540 MHz C13[H1] 1D in dmsd (ref. to DMSO @ 39.5 ppm), temp 26.5 C -> actual temp = 27.0 C, autoxdb probe

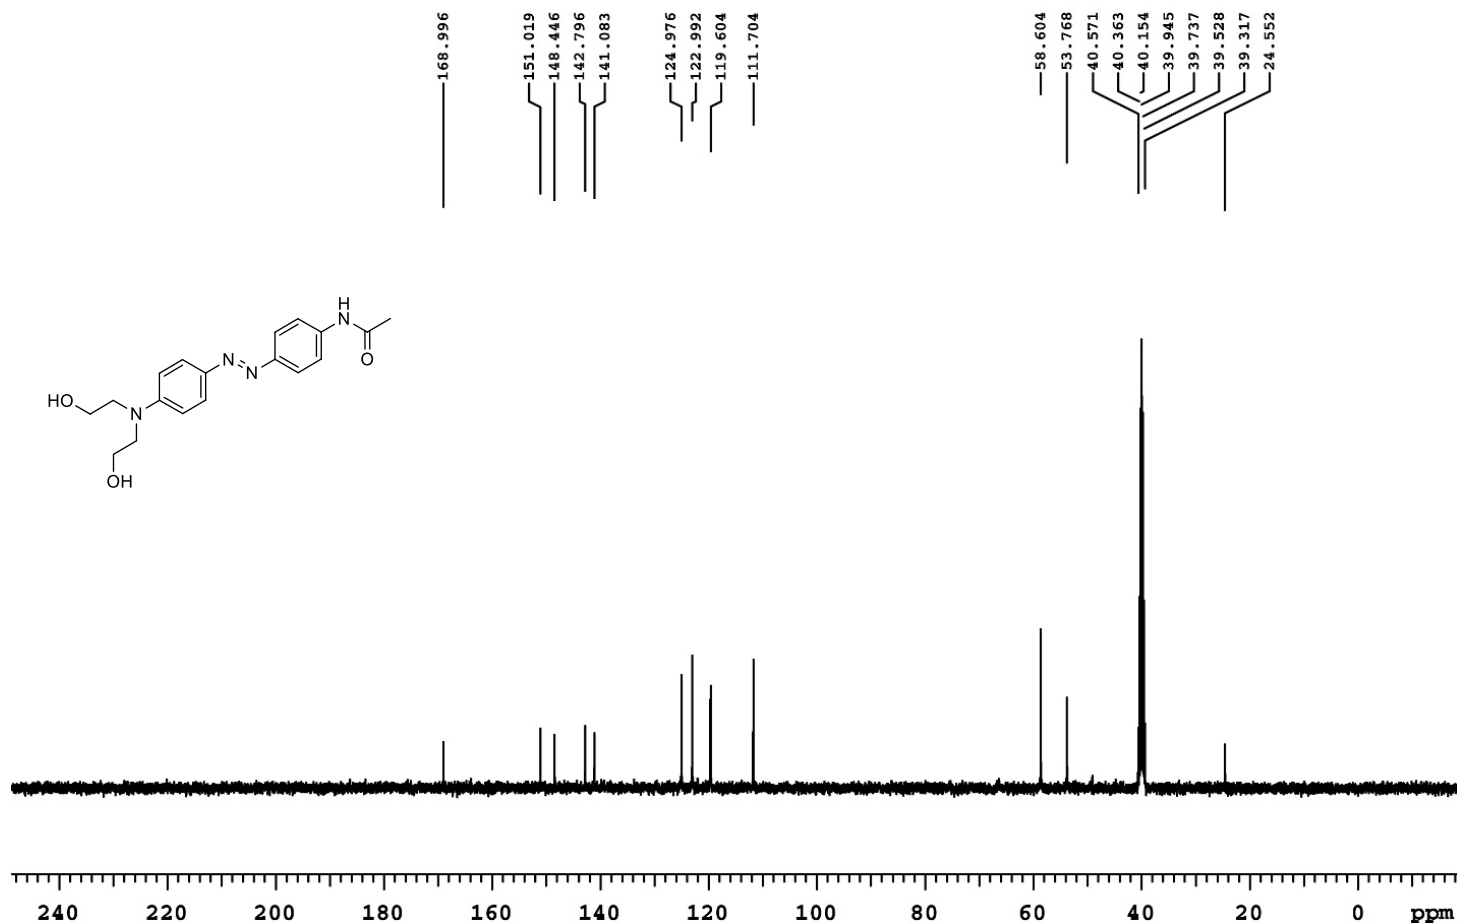

# <sup>1</sup>H-NMR of **1c**

399.986 MHz H1 1D in cd3od (ref. to CD3OD @ 3.30 ppm), temp 25.9 C -> actual temp = 27.0 C, onenmr probe

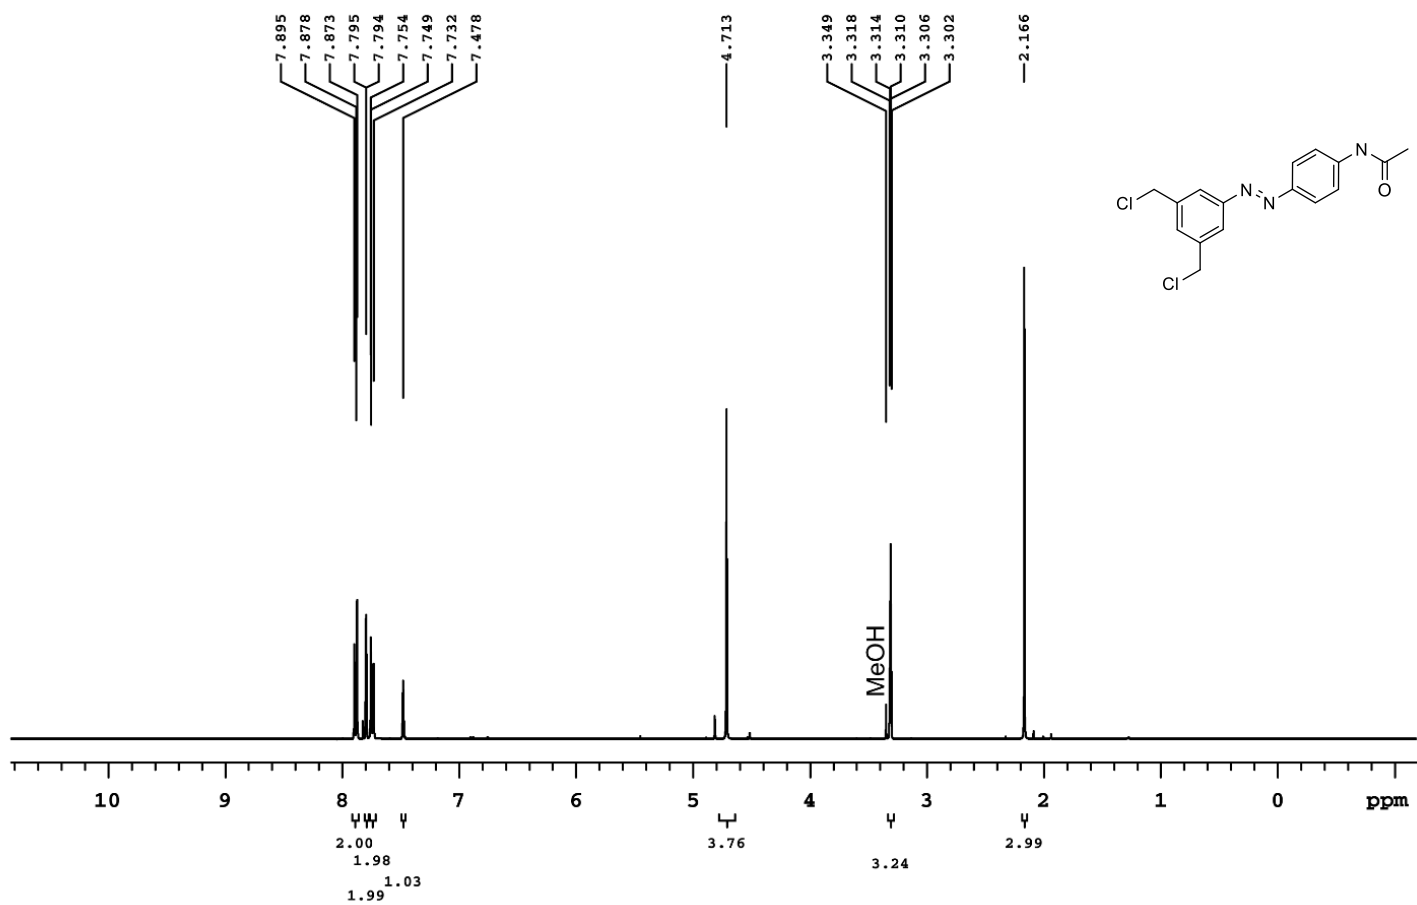

# <sup>13</sup>C-NMR of **1c**

100.588 MHz C13[H1] 1D in cd3od (ref. to CD3OD @ 49.0 ppm), temp 25.9 C -> actual temp = 27.0 C, onenmr probe!

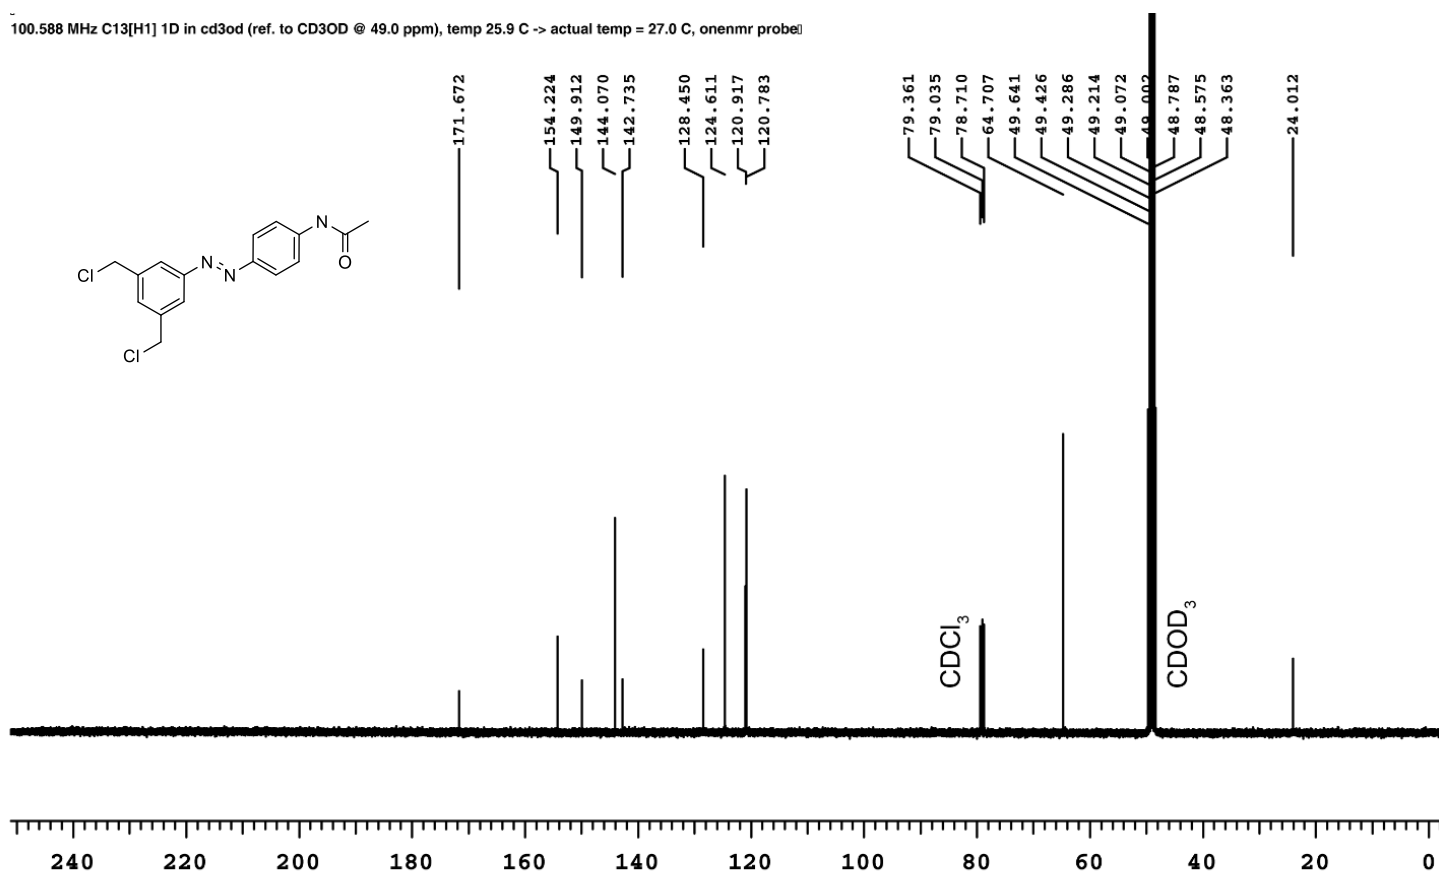

# <sup>1</sup>H-NMR of 1dA

399.794 MHz H1 1D in cdcl3 (ref. to CDCl3 @ 7.26 ppm), temp 26.5 C -> actual temp = 27.0 C, autoxdb probe

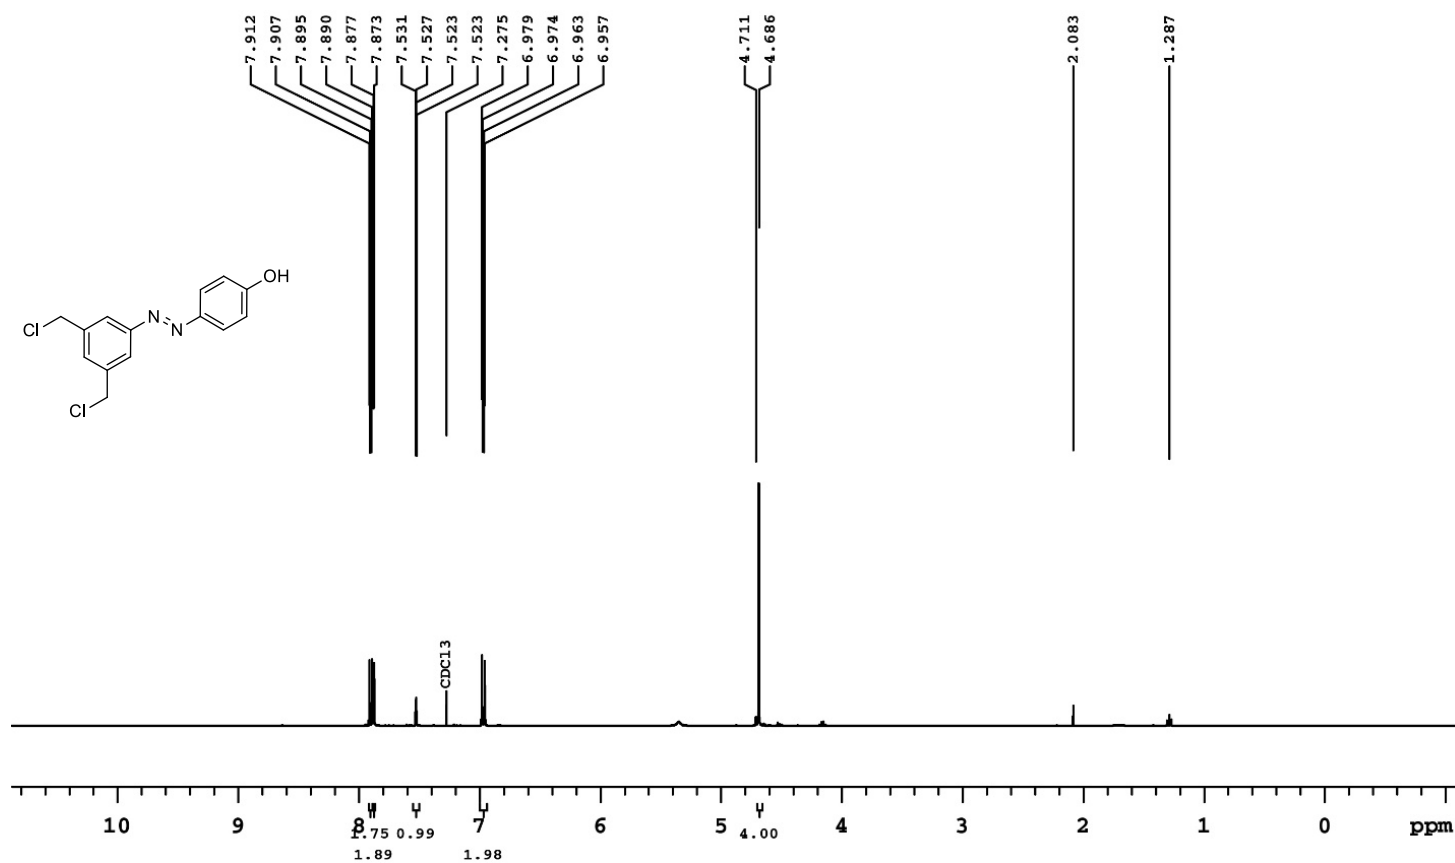

# <sup>13</sup>C-NMR of **1dA**

100.587 MHz C13[H1] 1D in cdcl3 (ref. to CDCl3 @ 77.06 ppm), temp 25.9 C -> actual temp = 27.0 C, onenmr probe

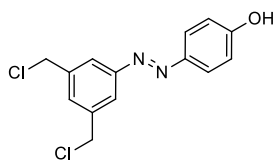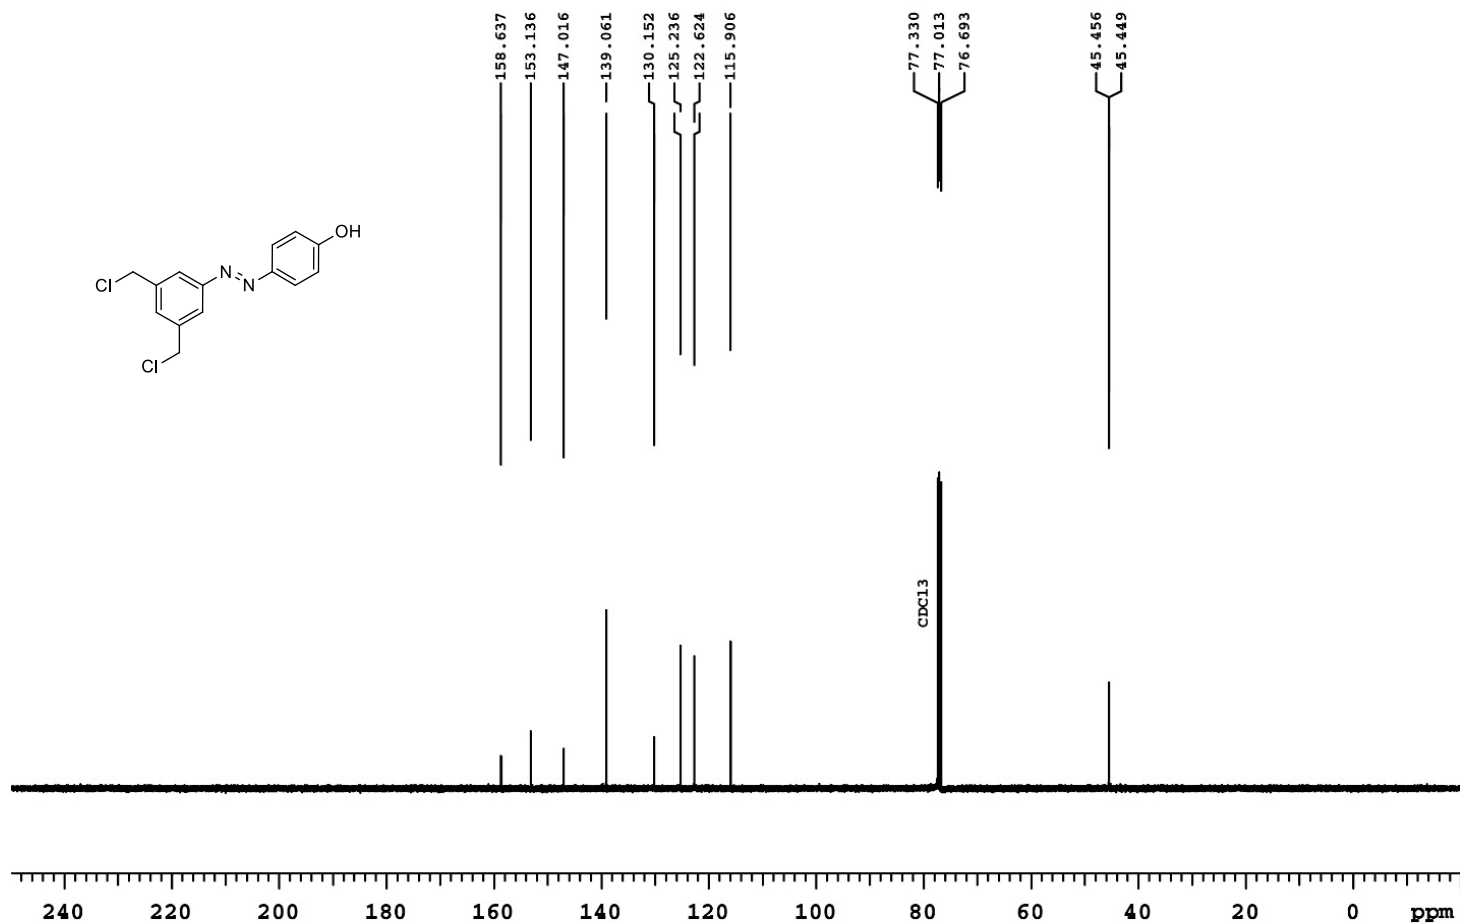

# <sup>1</sup>H-NMR of **1d**

399.794 MHz H1 1D in cdcl3 (ref. to CDCl3 @ 7.26 ppm), temp 26.5 C -> actual temp = 27.0 C, autoxdb probe

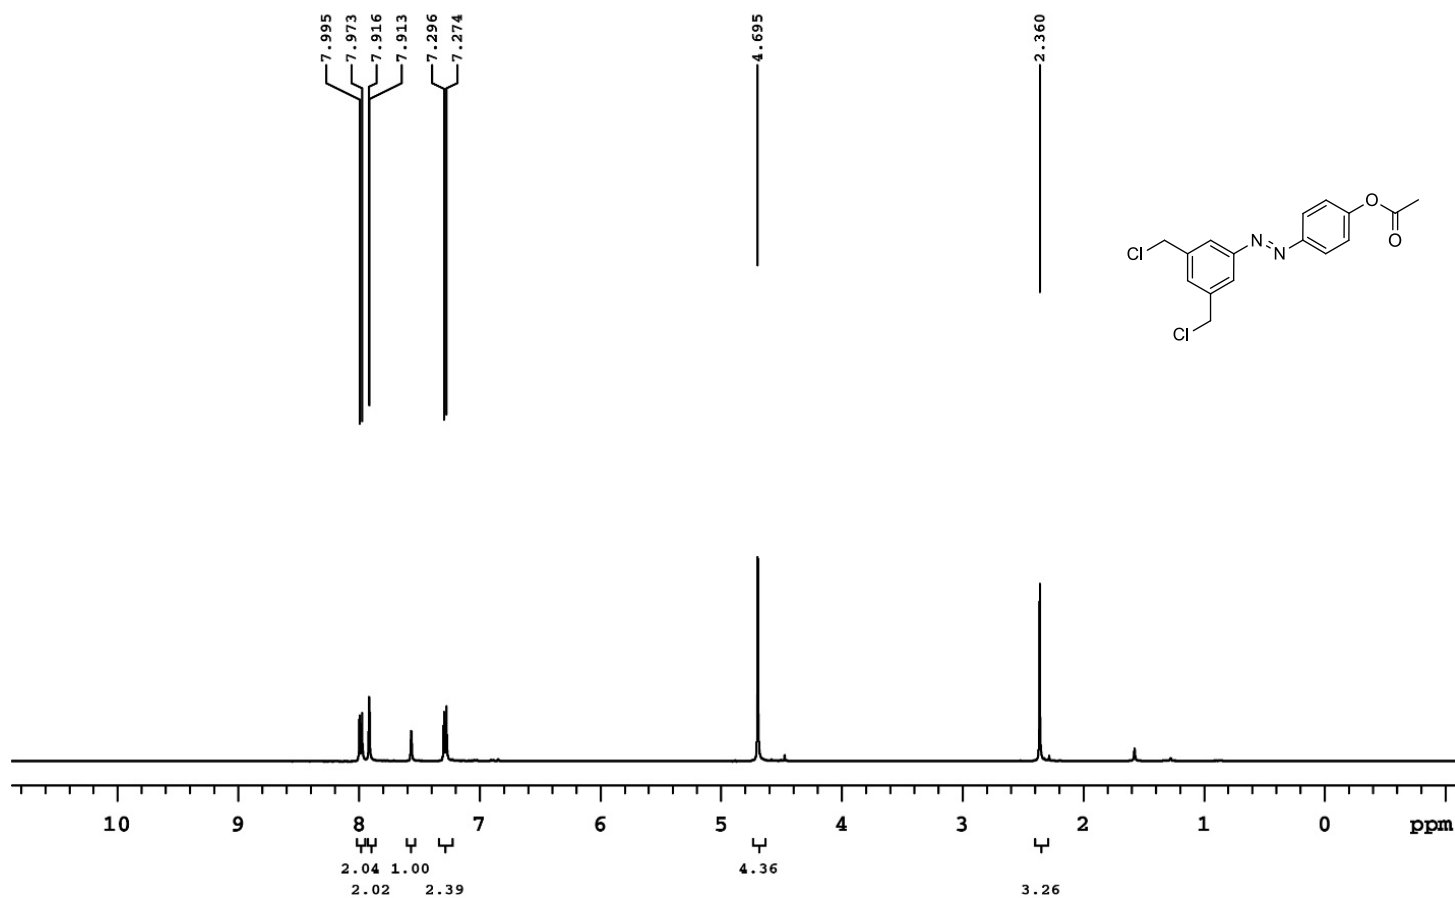

# <sup>13</sup>C-NMR of **1d**

125.691 MHz C13[H1] 1D in cdcl3 (ref. to CDCl3 @ 77.06 ppm), temp 27.7 C -> actual temp = 27.0 C, cold dual probe

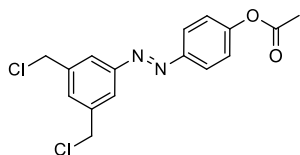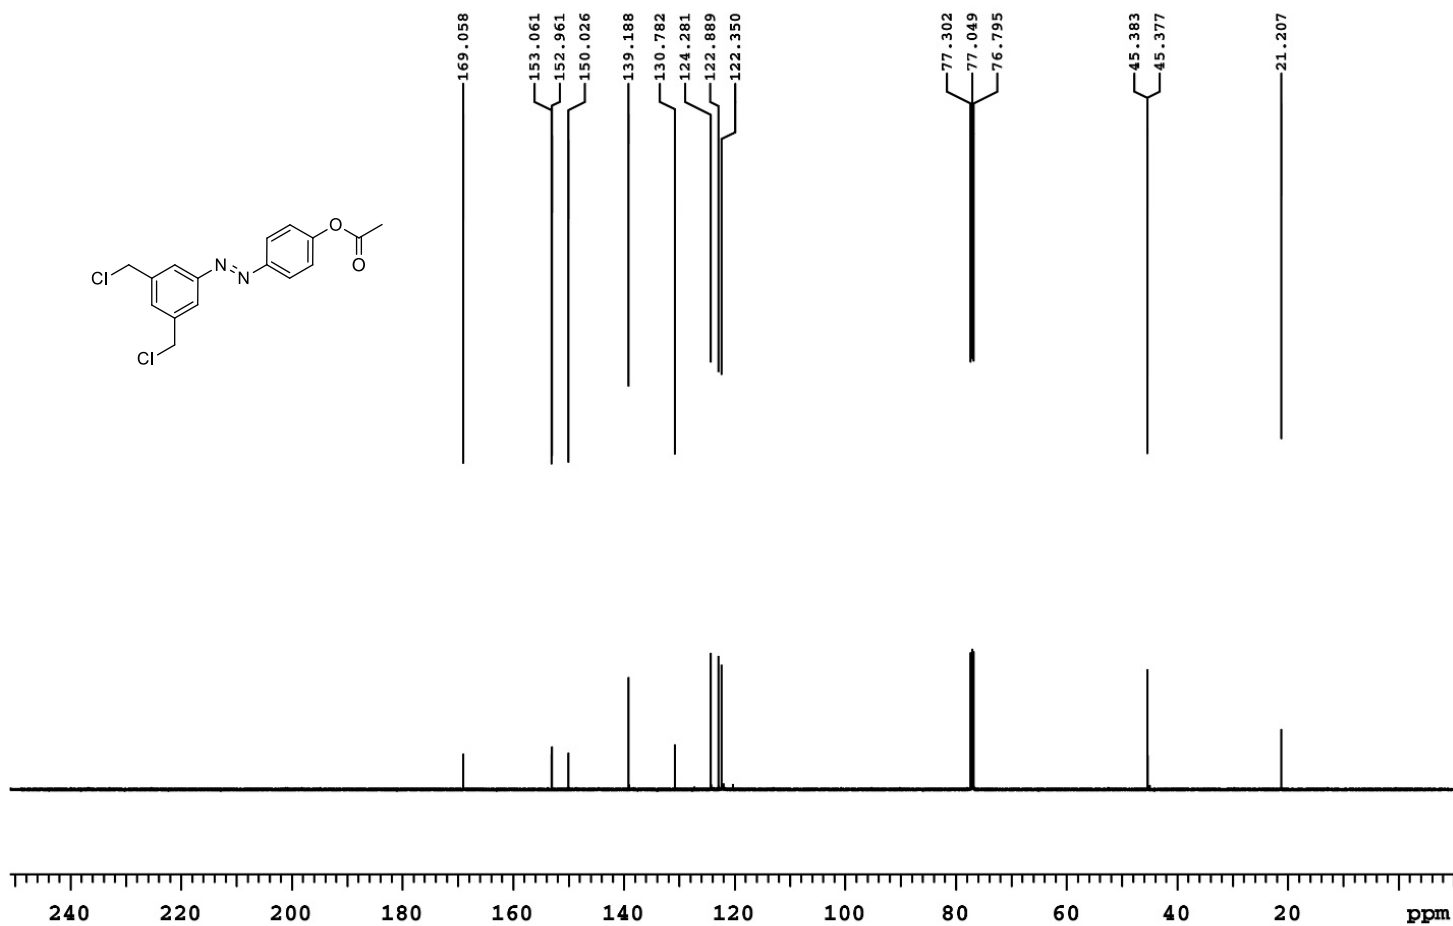

# <sup>1</sup>H-NMR of **2b**

399.986 MHz H1 1D in cd3od (ref. to CD3OD @ 3.30 ppm), temp 25.9 C -> actual temp = 27.0 C, onenmr probe

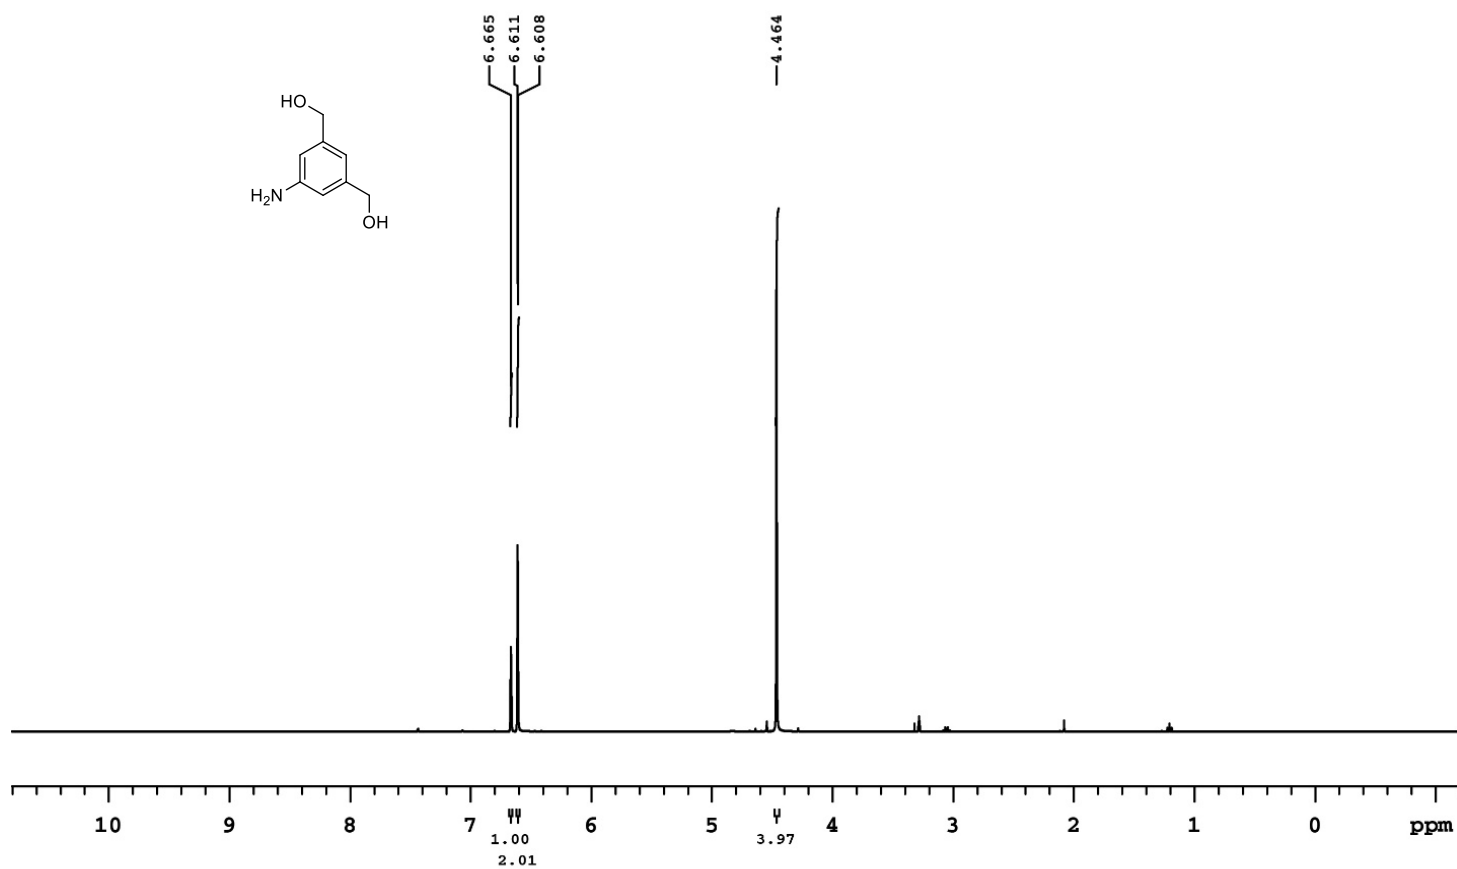

# <sup>13</sup>C-NMR of **2b**

100.588 MHz C13[H1] APT<sub>ad</sub> in cd3od (ref. to CD3OD @ 49.0 ppm), temp 25.9 C -> actual temp = 27.0 C, onenmr probe  
C & CH2 same, CH & CH3 opposite side of solvent signal

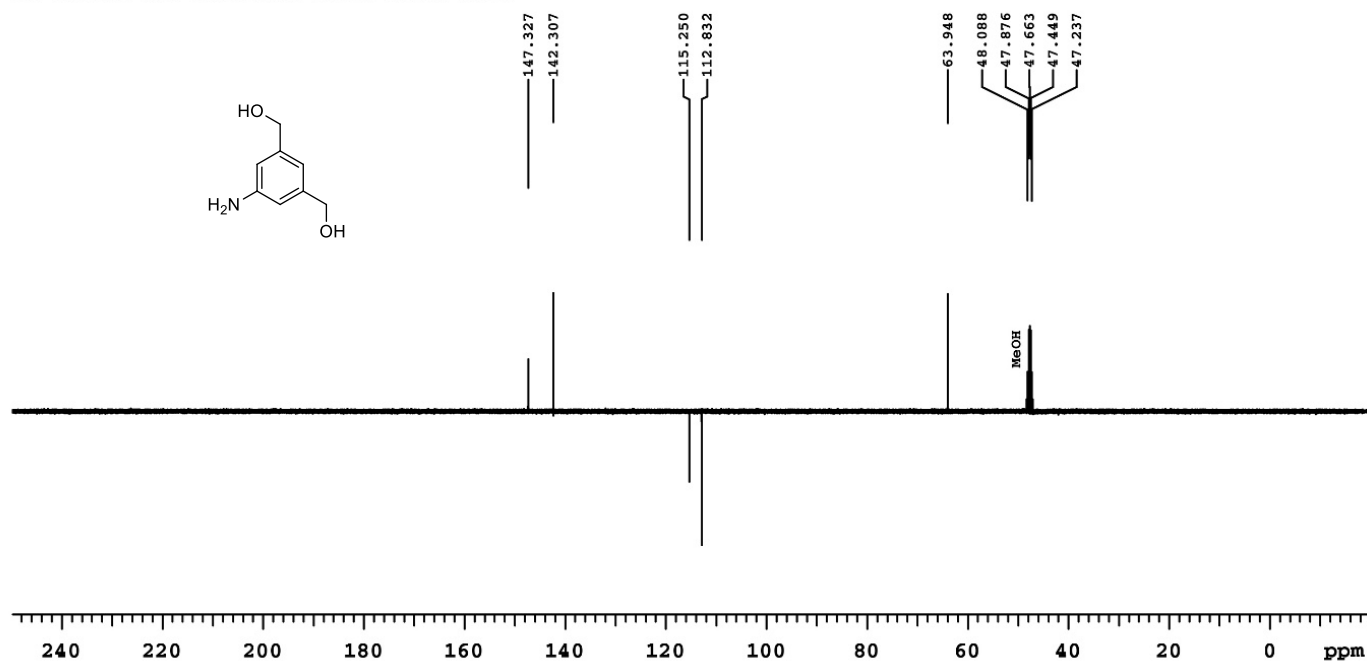

# <sup>1</sup>H-NMR of **2c**

399.796 MHz H1 1D in cd3od (ref. to CD3OD @ 3.30 ppm), temp 26.5 C -> actual temp = 27.0 C, autotdb probe

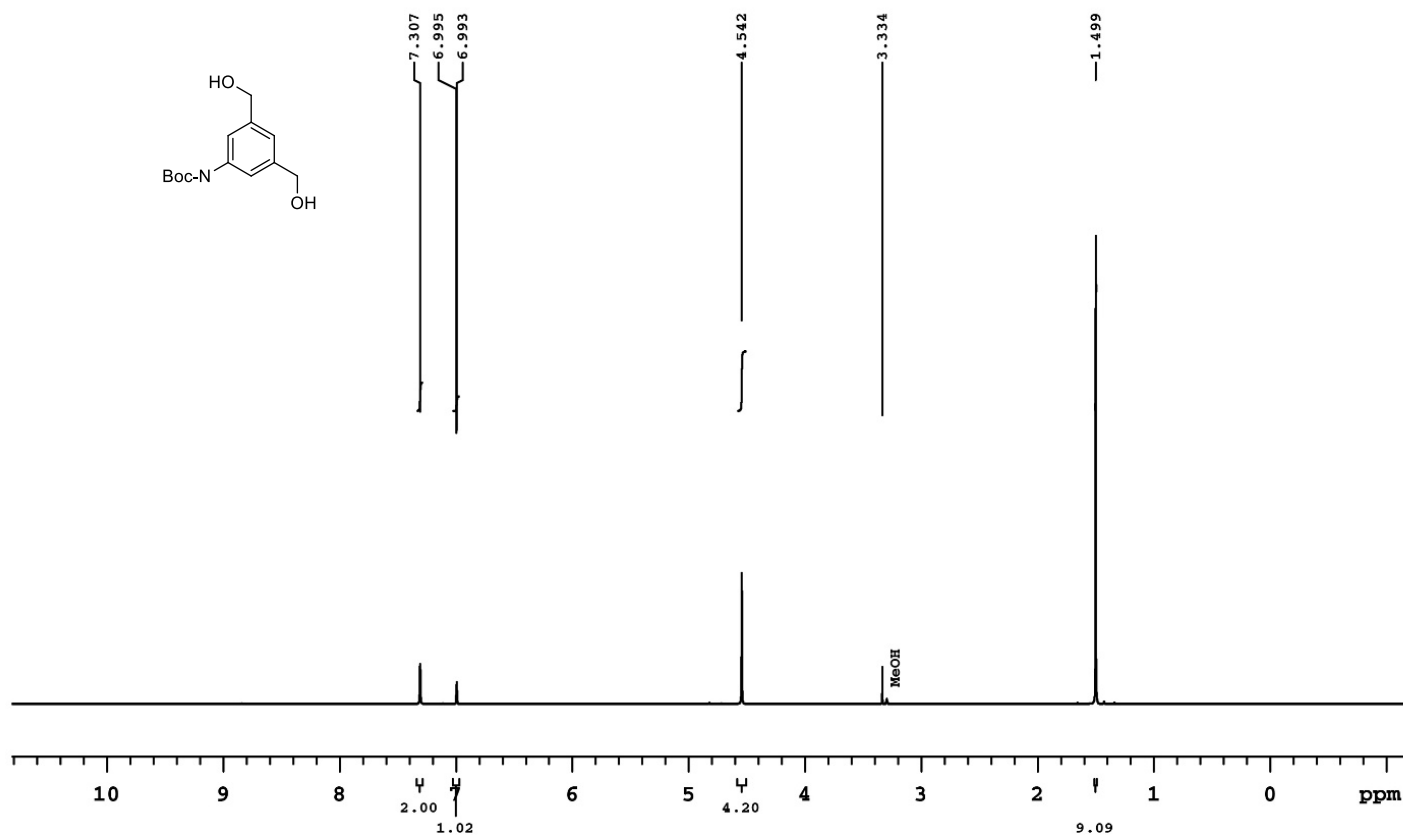

# <sup>13</sup>C-NMR of **2c**

100.540 MHz C13[H1] APT\_ad in cd3od (ref. to CD3OD @ 49.0 ppm), temp 26.5 C -> actual temp = 27.0 C, autotdb probe  
C & CH2 same, CH & CH3 opposite side of solvent signal

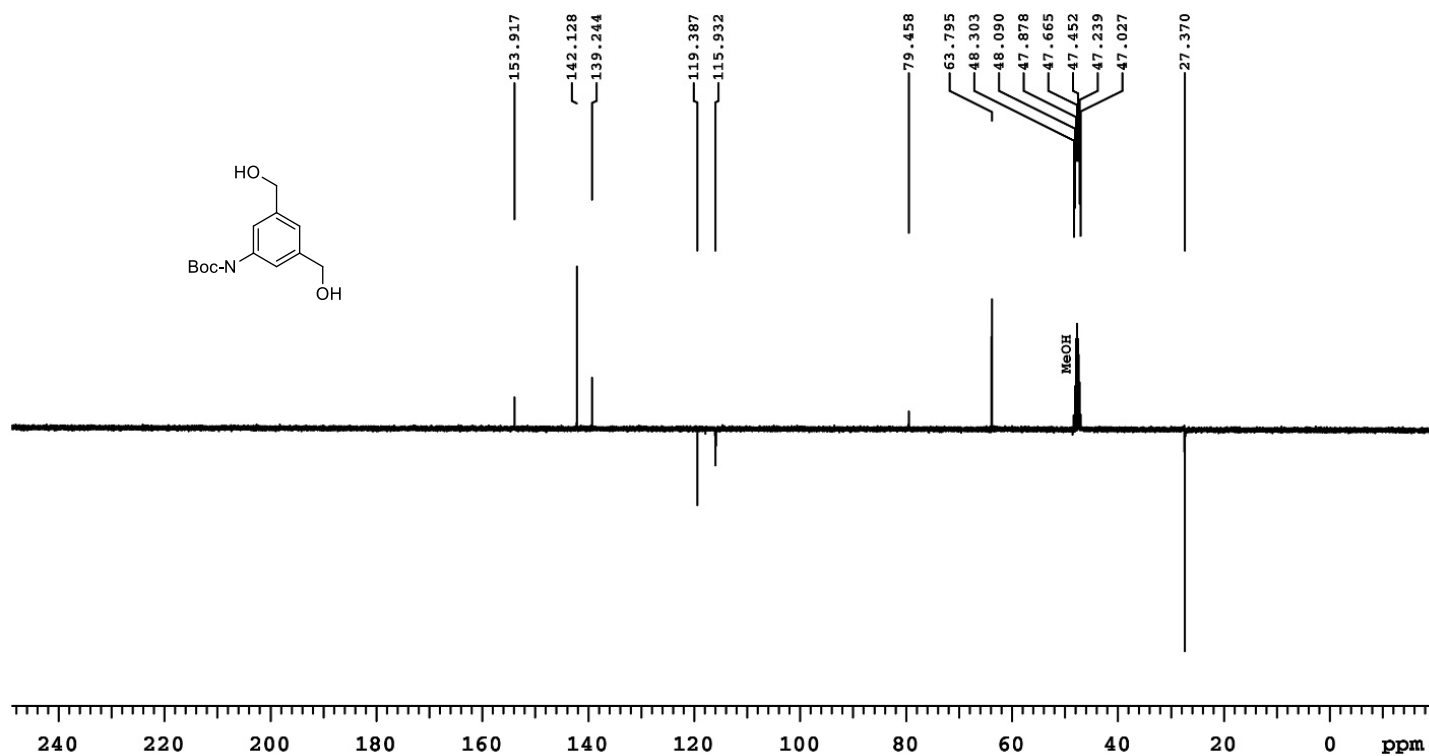

# <sup>1</sup>H-NMR of **2d**

399.794 MHz H1 1D in cdcl3 (ref. to CDCl3 @ 7.26 ppm), temp 26.5 C -> actual temp = 27.0 C, autotdb probe

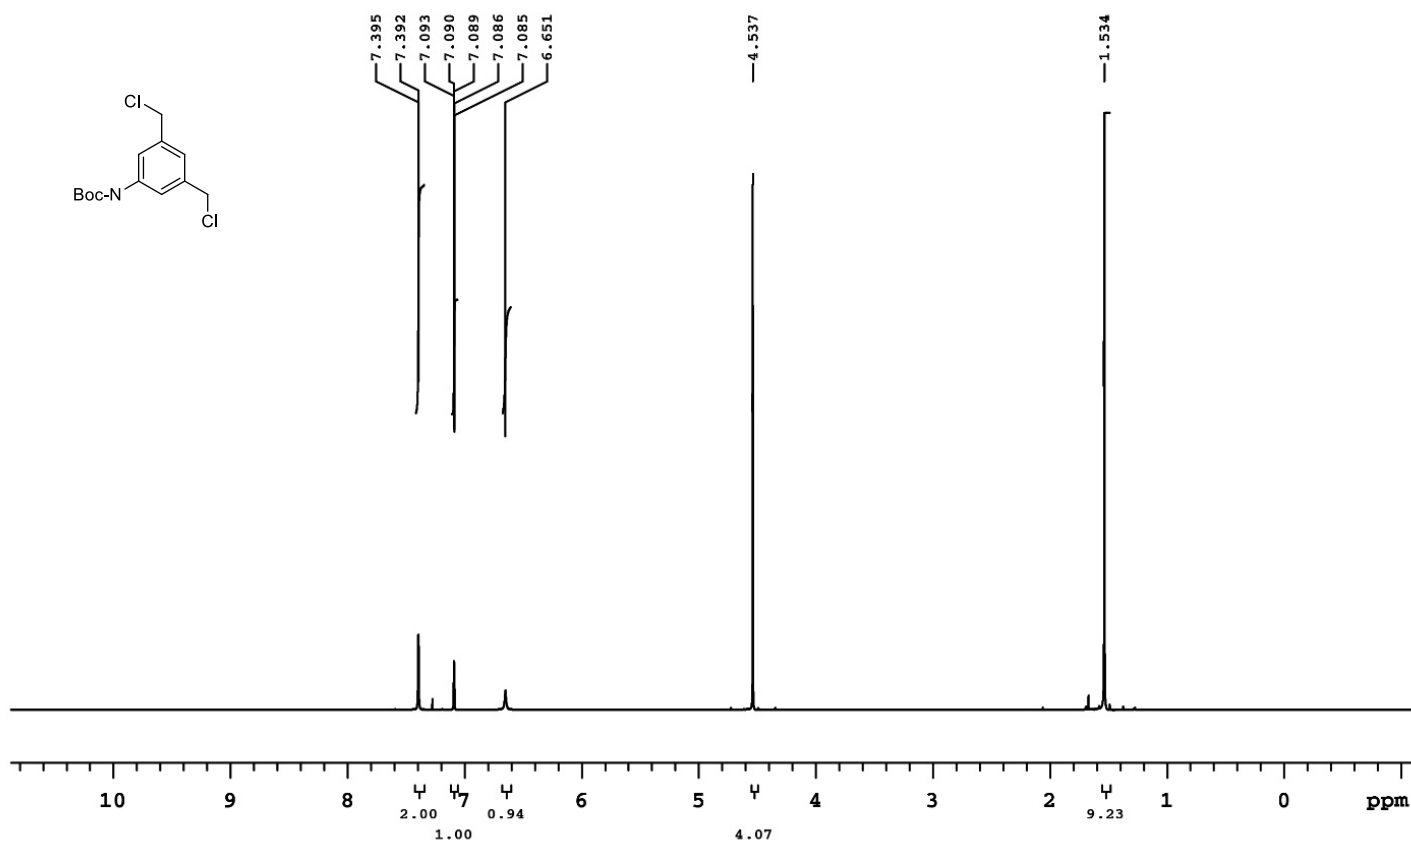

# <sup>13</sup>C-NMR of **2d**

100.539 MHz C13[H1] 1D in cdcl3 (ref. to CDCl3 @ 77.06 ppm), temp 26.5 C -> actual temp = 27.0 C, autoxdb probe

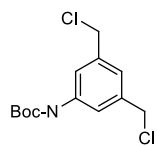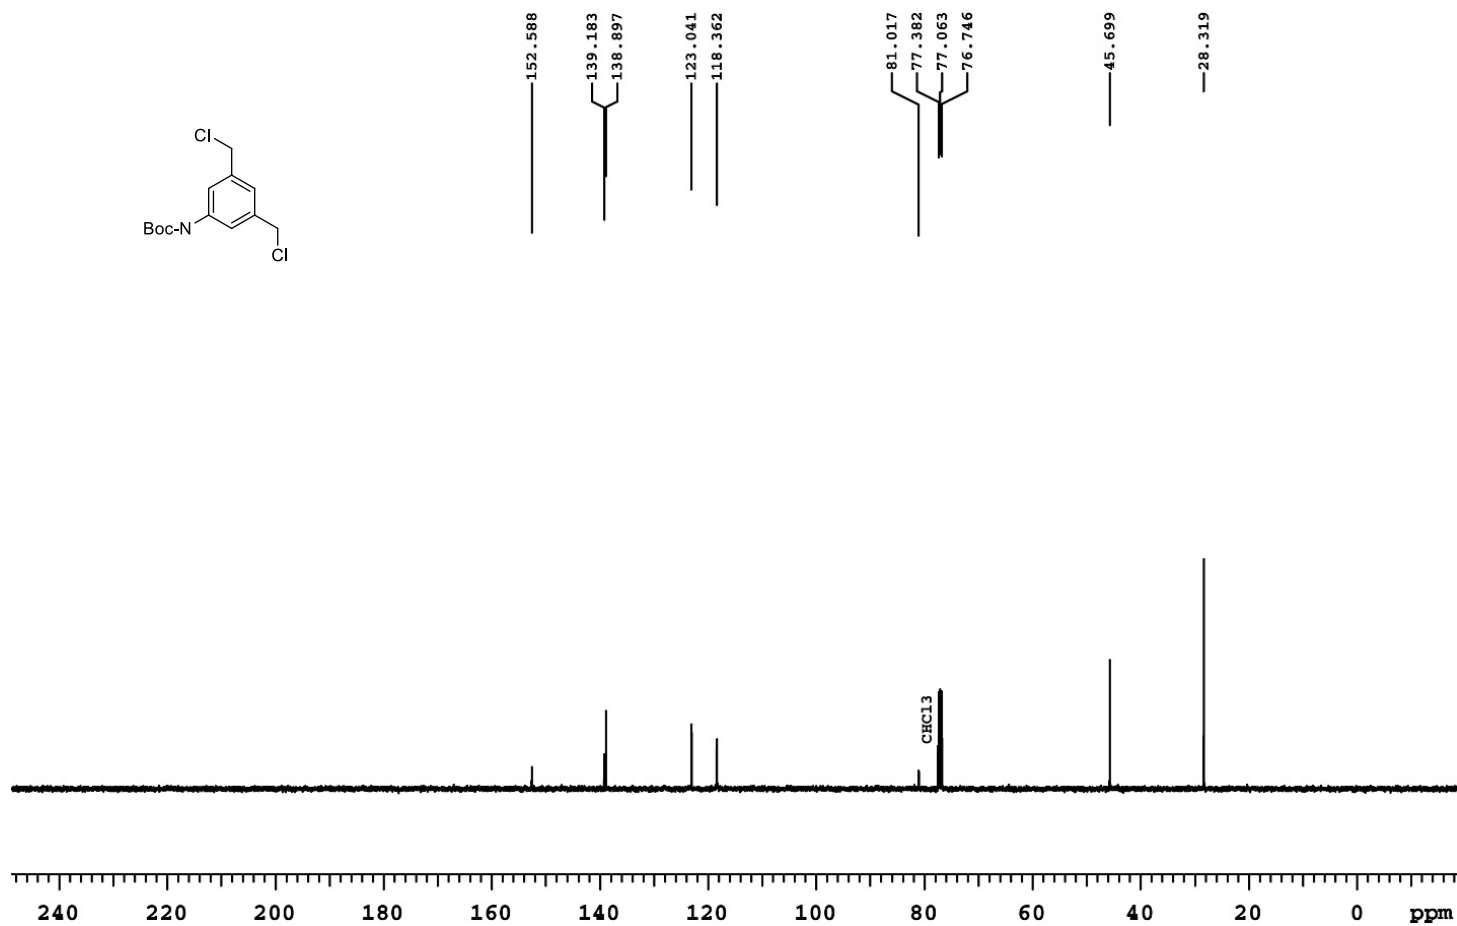

# <sup>1</sup>H-NMR of **2e**

399.794 MHz H1 1D in cdcl3 (ref. to CDCl3 @ 7.26 ppm), temp 26.5 C -> actual temp = 27.0 C, autoxdb probe

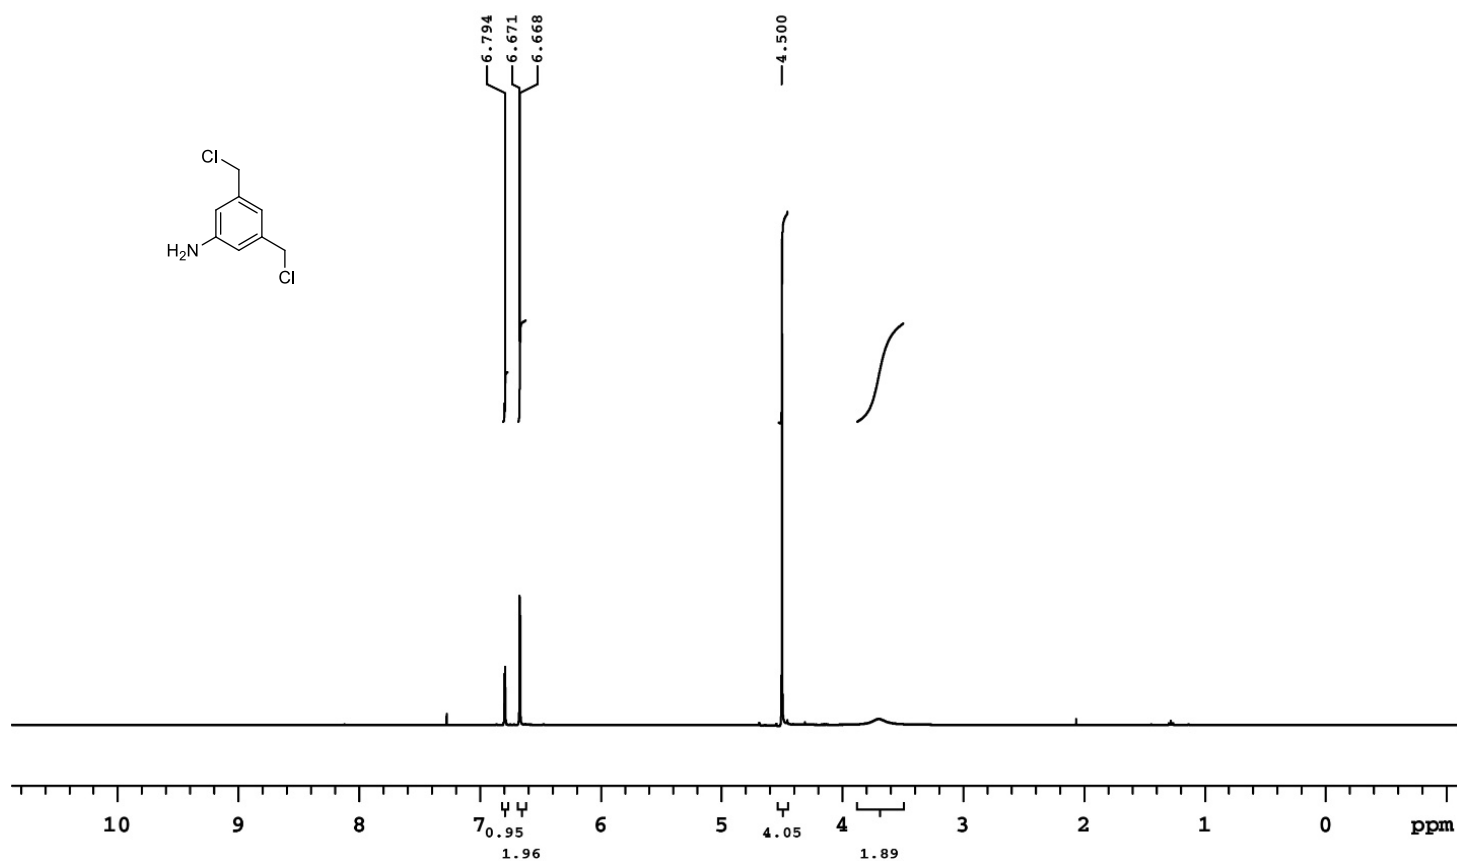

# <sup>13</sup>C-NMR of **2e**

100.539 MHz C13[H1] 1D in cdcl3 (ref. to CDCl3 @ 77.06 ppm), temp 26.5 C -> actual temp = 27.0 C, autotdb probe

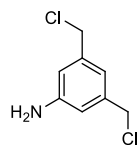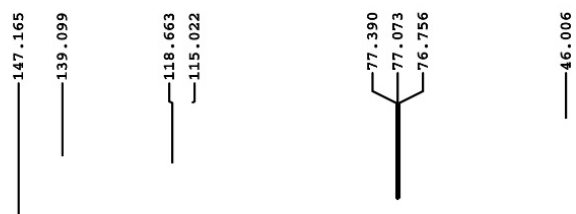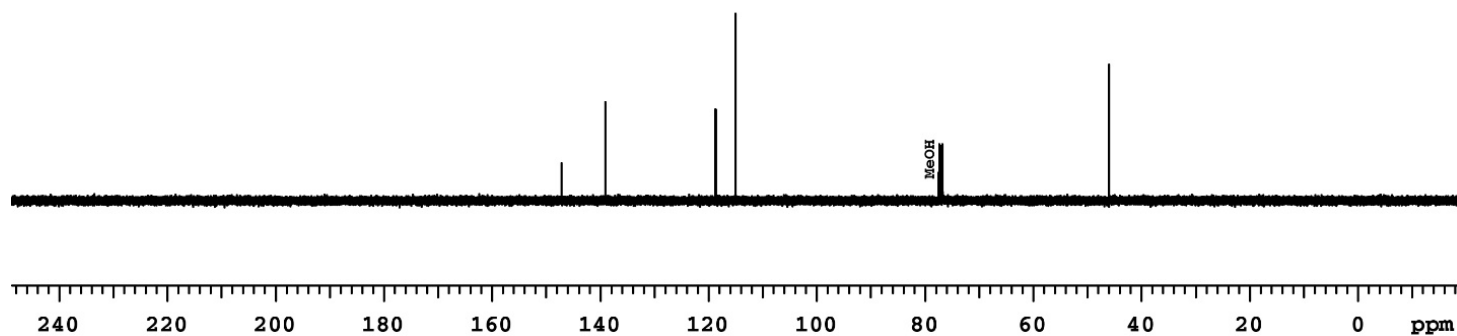

# <sup>1</sup>H-NMR of 2f

399.794 MHz H1 1D in cdcl3 (ref. to CDC13 @ 7.26 ppm), temp 26.5 C -> actual temp = 27.0 C, autoxdb probe

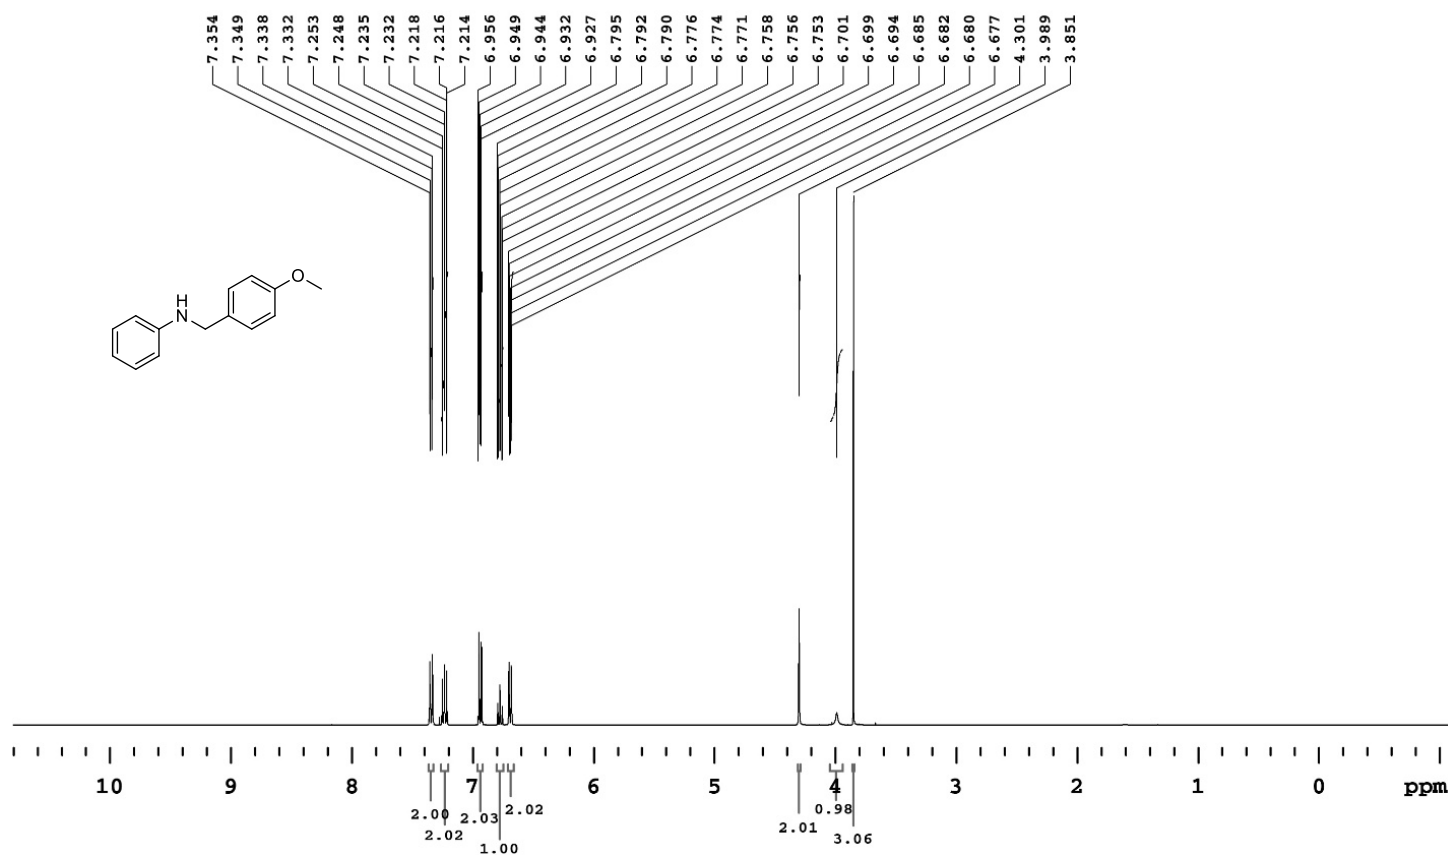

# <sup>13</sup>C-NMR of **2f**

100.539 MHz C13[H1] 1D in cdcl3 (ref. to CDCl3 @ 77.06 ppm), temp 26.5 C -> actual temp = 27.0 C, autoxdb probe

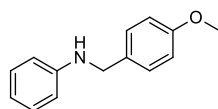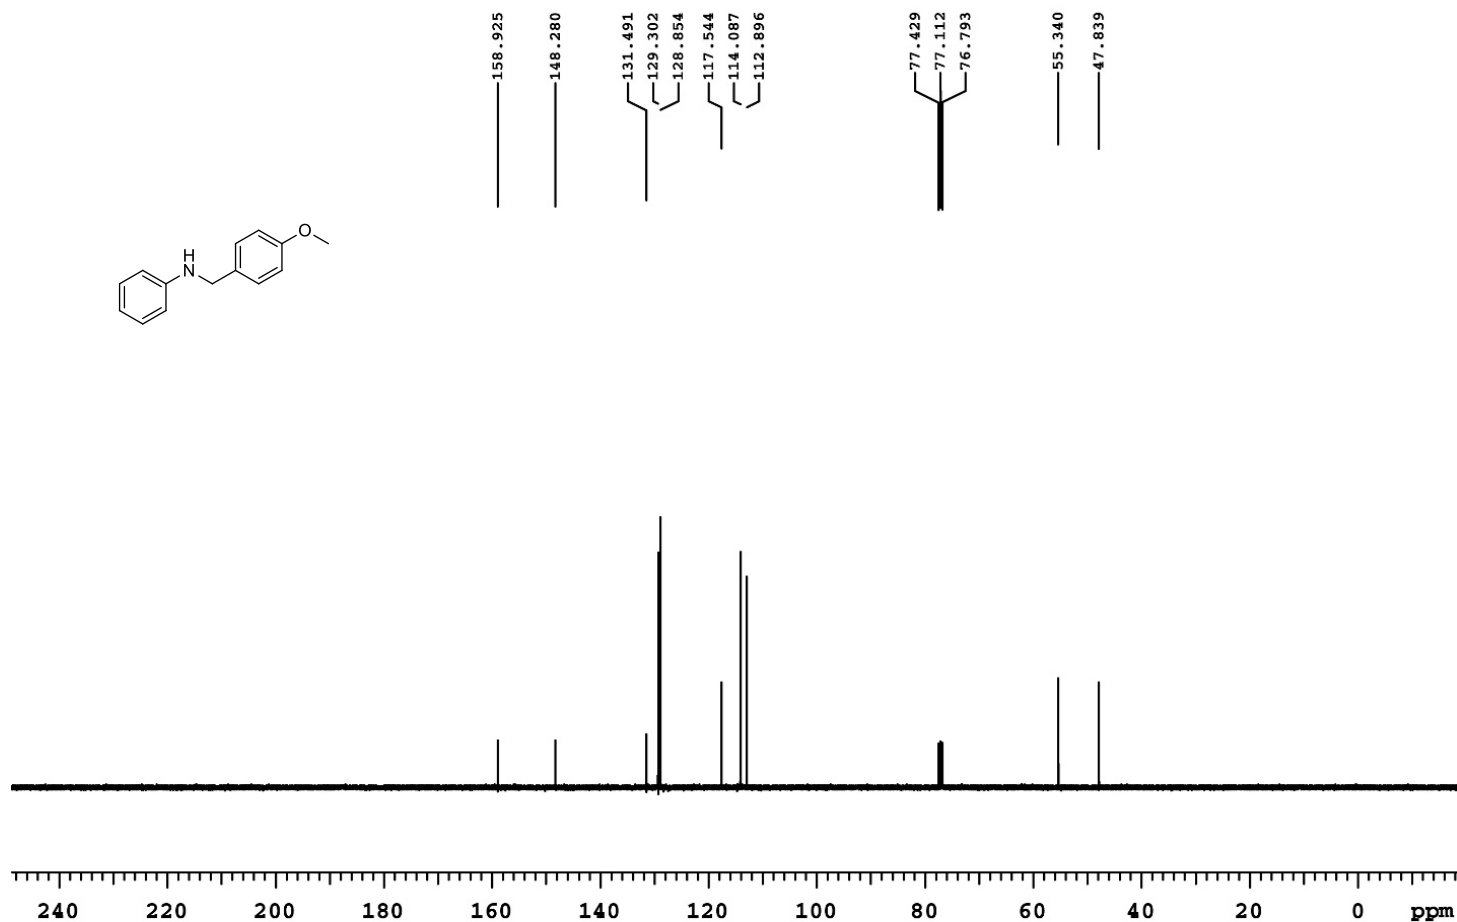

<sup>1</sup>H-NMR of **2g**

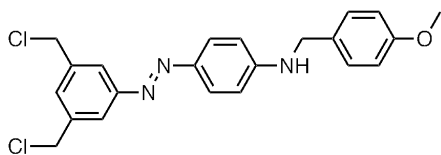

9.984 MHz H1 1D in cdc13 (ref. to CDCl3 @ 7.26 ppm), temp 25.9 C -> actual temp = 27.0 C, onenmr probe

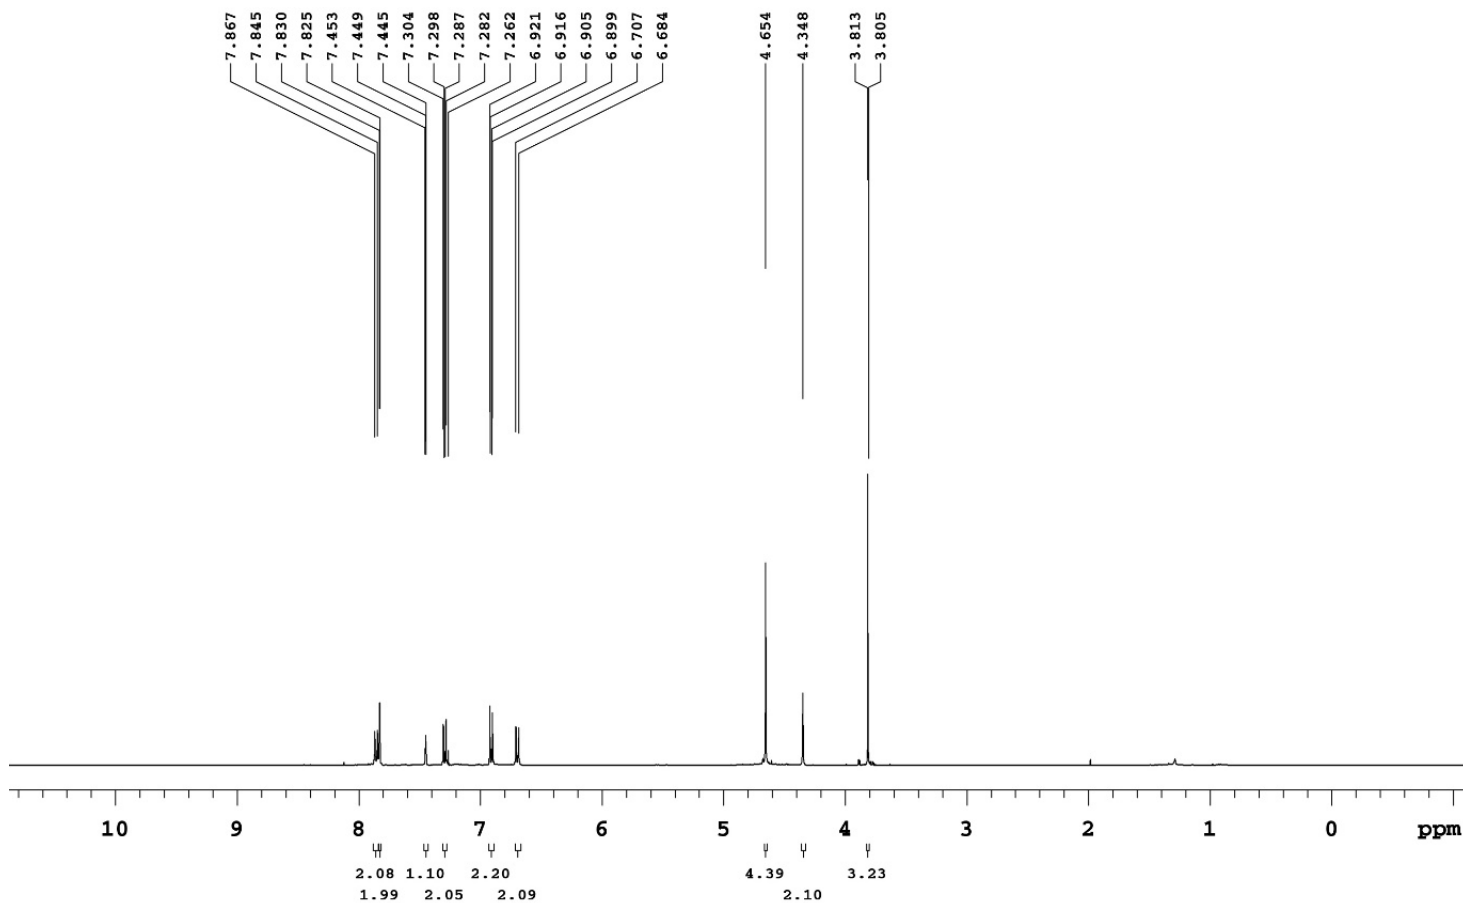

<sup>13</sup>C-NMR of **2g**



100.587 MHz C13[H1] 1D in cdcl3 (ref. to CDCl3 @ 77.06 ppm), temp 25.9 C -> actual temp = 27.0 C, onenmr probe

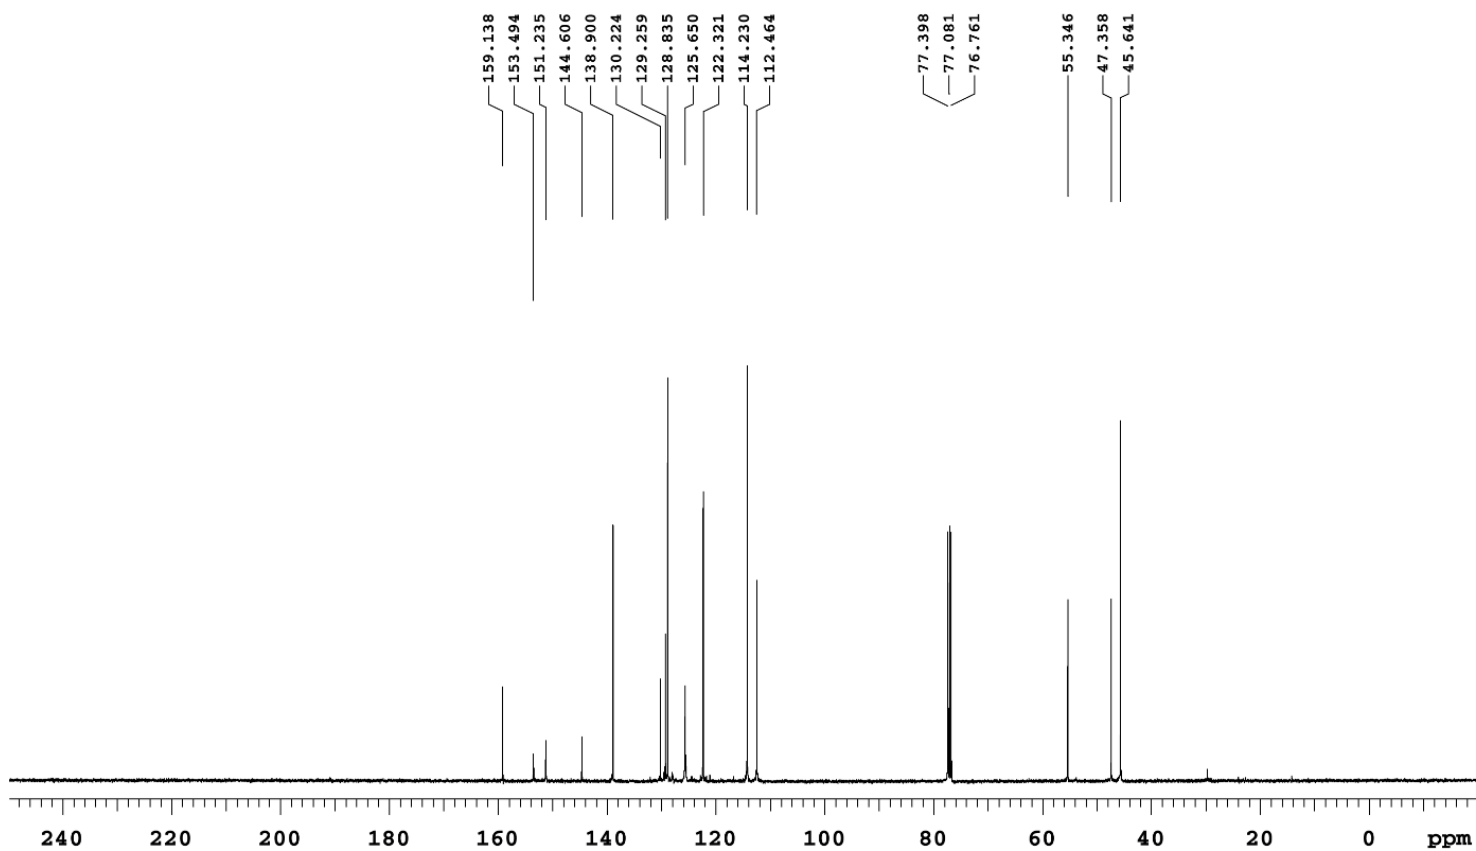

# <sup>1</sup>H-NMR of **2h**

399.794 MHz H1 1D in cdcl3 (ref. to CDC13 @ 7.26 ppm), temp 26.5 C -> actual temp = 27.0 C, autoxdb probe

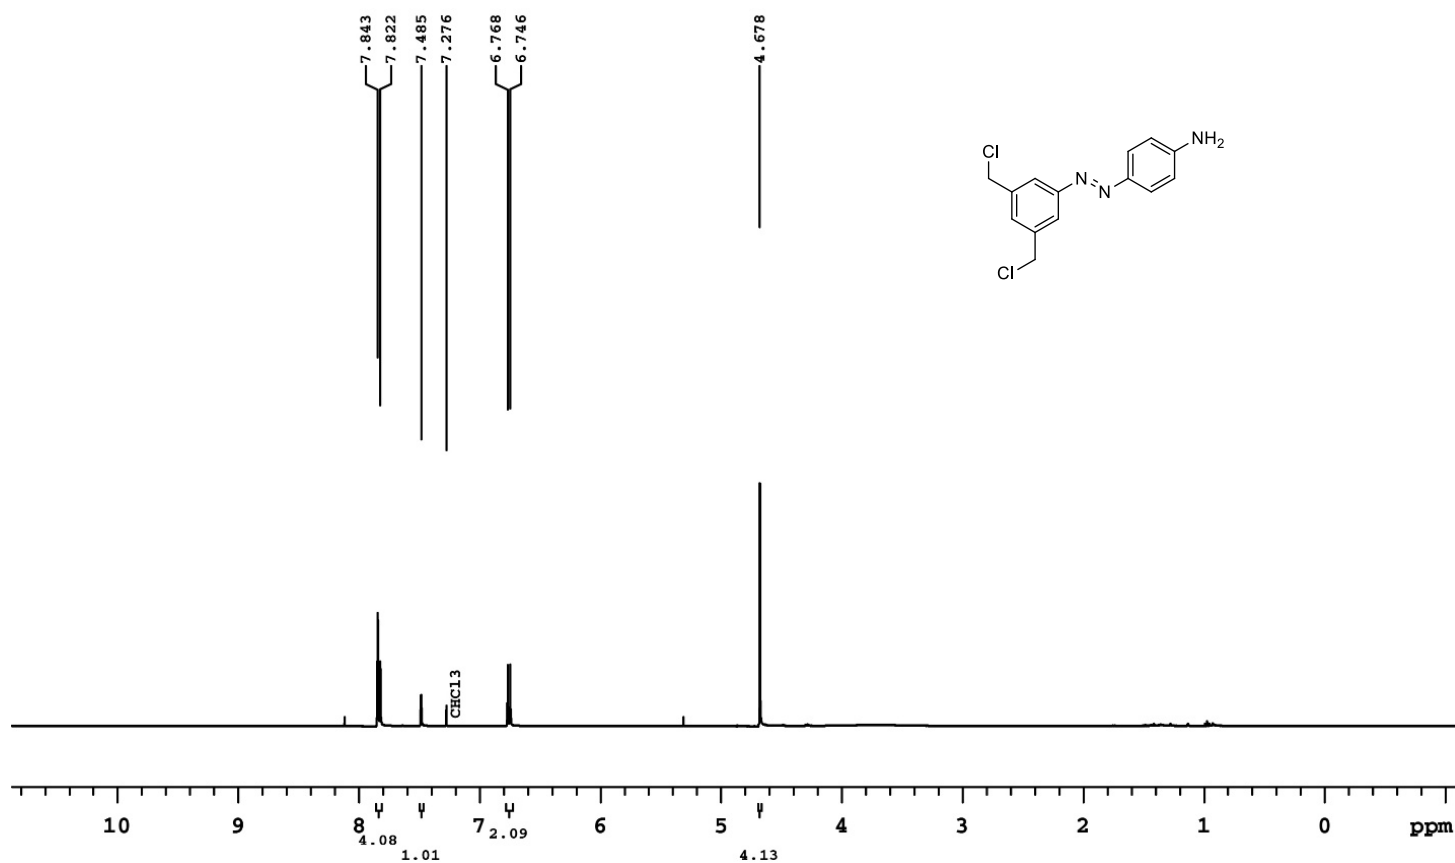

# <sup>13</sup>C-NMR of **2h**

100.539 MHz C13[H1] 1D in cdcl3 (ref. to CDCl3 @ 77.06 ppm), temp 26.5 C -> actual temp = 27.0 C, autoxdb probe

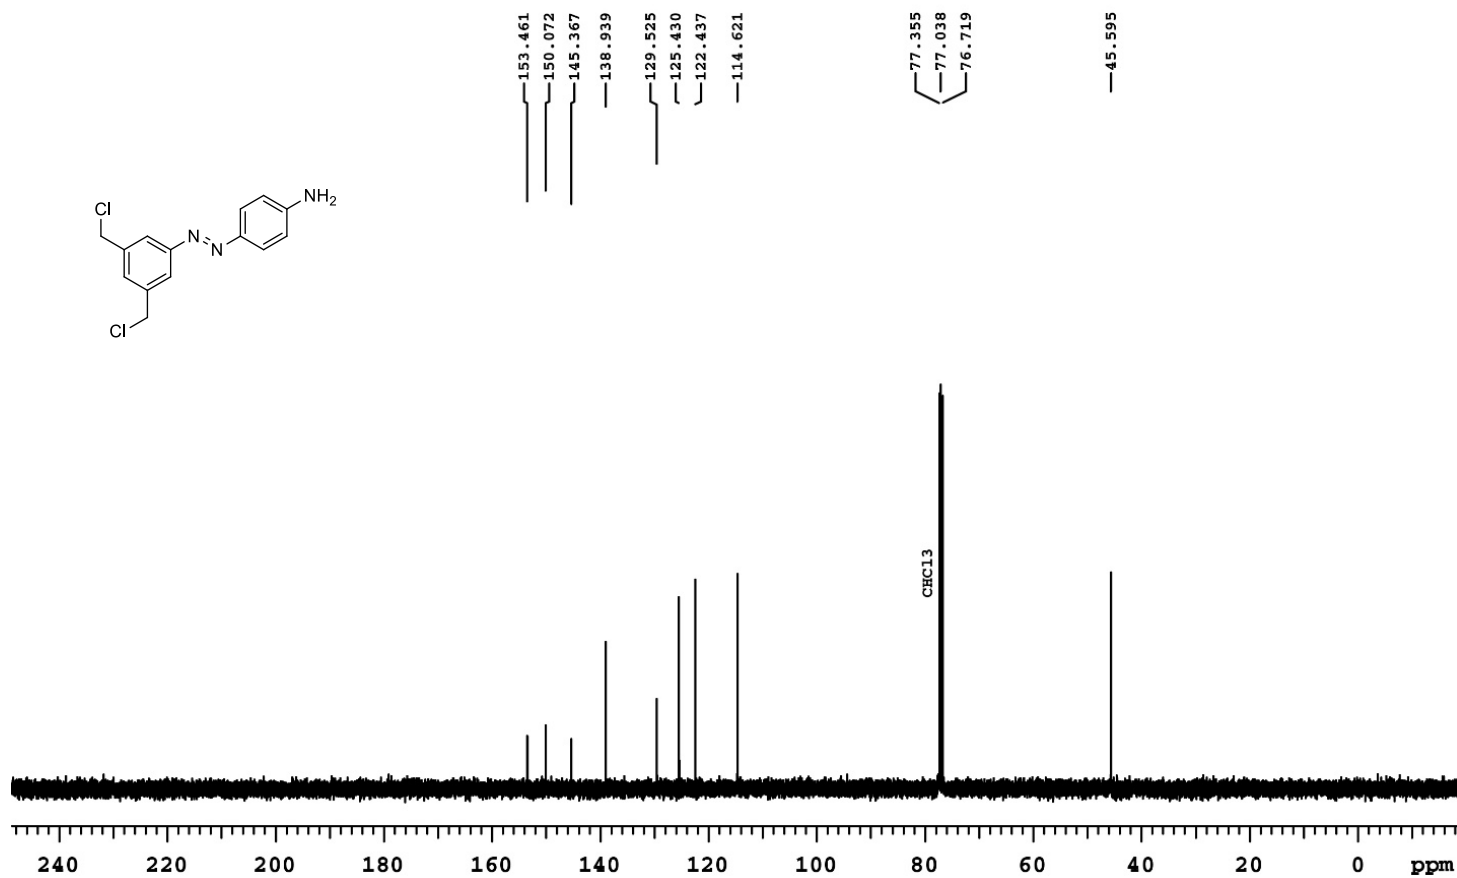

<sup>1</sup>H-NMR of **2i**

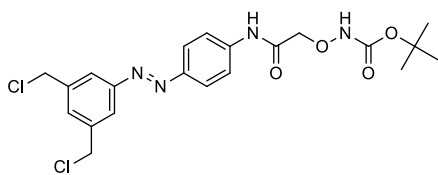

399.794 MHz H1 1D in cdcl3 (ref. to CDCl3 @ 7.26 ppm), temp 26.5 C -> actual temp = 27.0 C, autotx probe

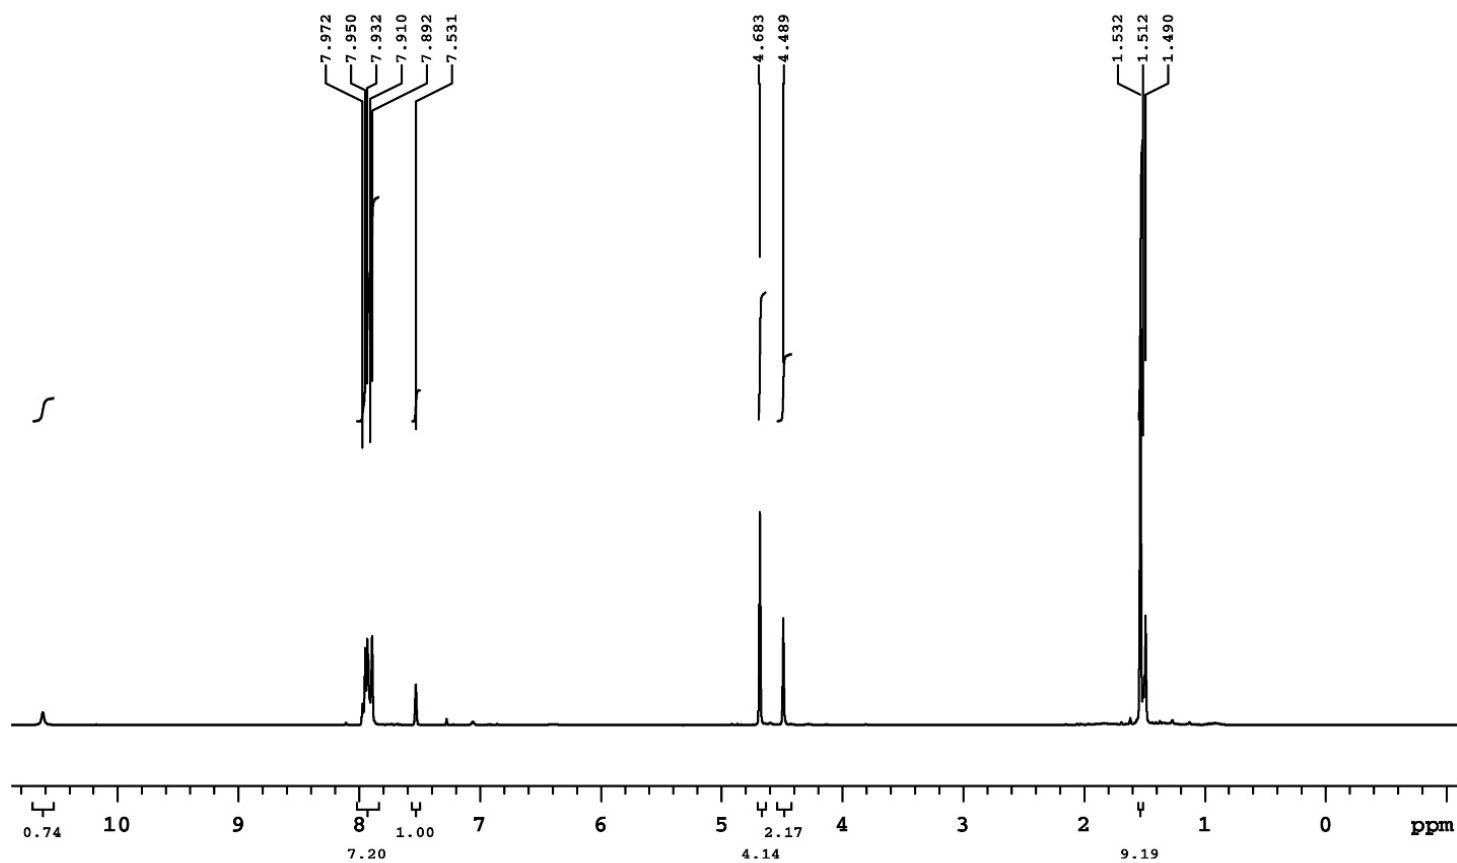

# <sup>13</sup>C-NMR of **2i**

100.539 MHz C13[H1] 1D in cdcl3 (ref. to CDCl3 @ 77.06 ppm), temp 26.5 C -> actual temp = 27.0 C, autotdb probe

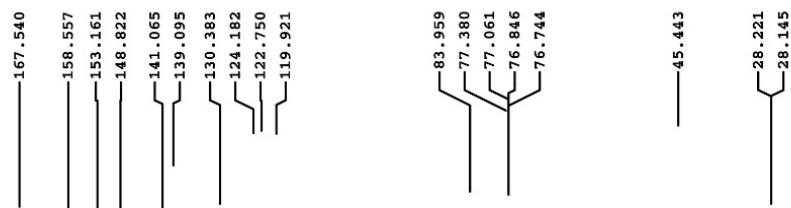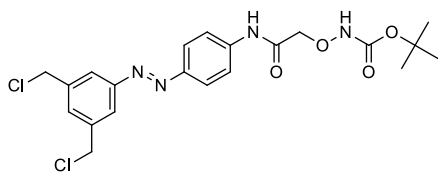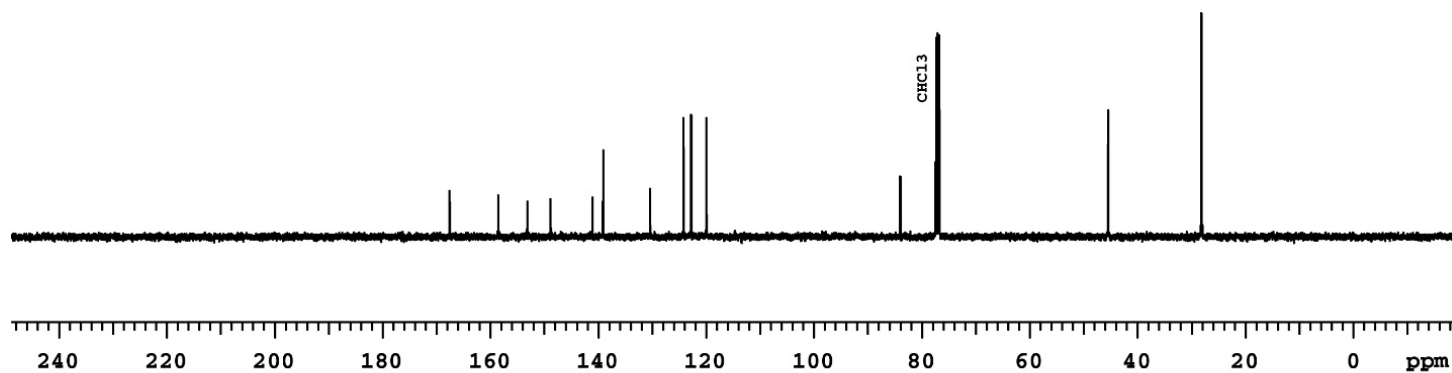

# <sup>1</sup>H-NMR of **2j**

<sup>1</sup>  
399.986 MHz H1 1D in cd3od (ref. to CD3OD @ 3.30 ppm), temp 25.9 C -> actual temp = 27.0 C, onenmr probe

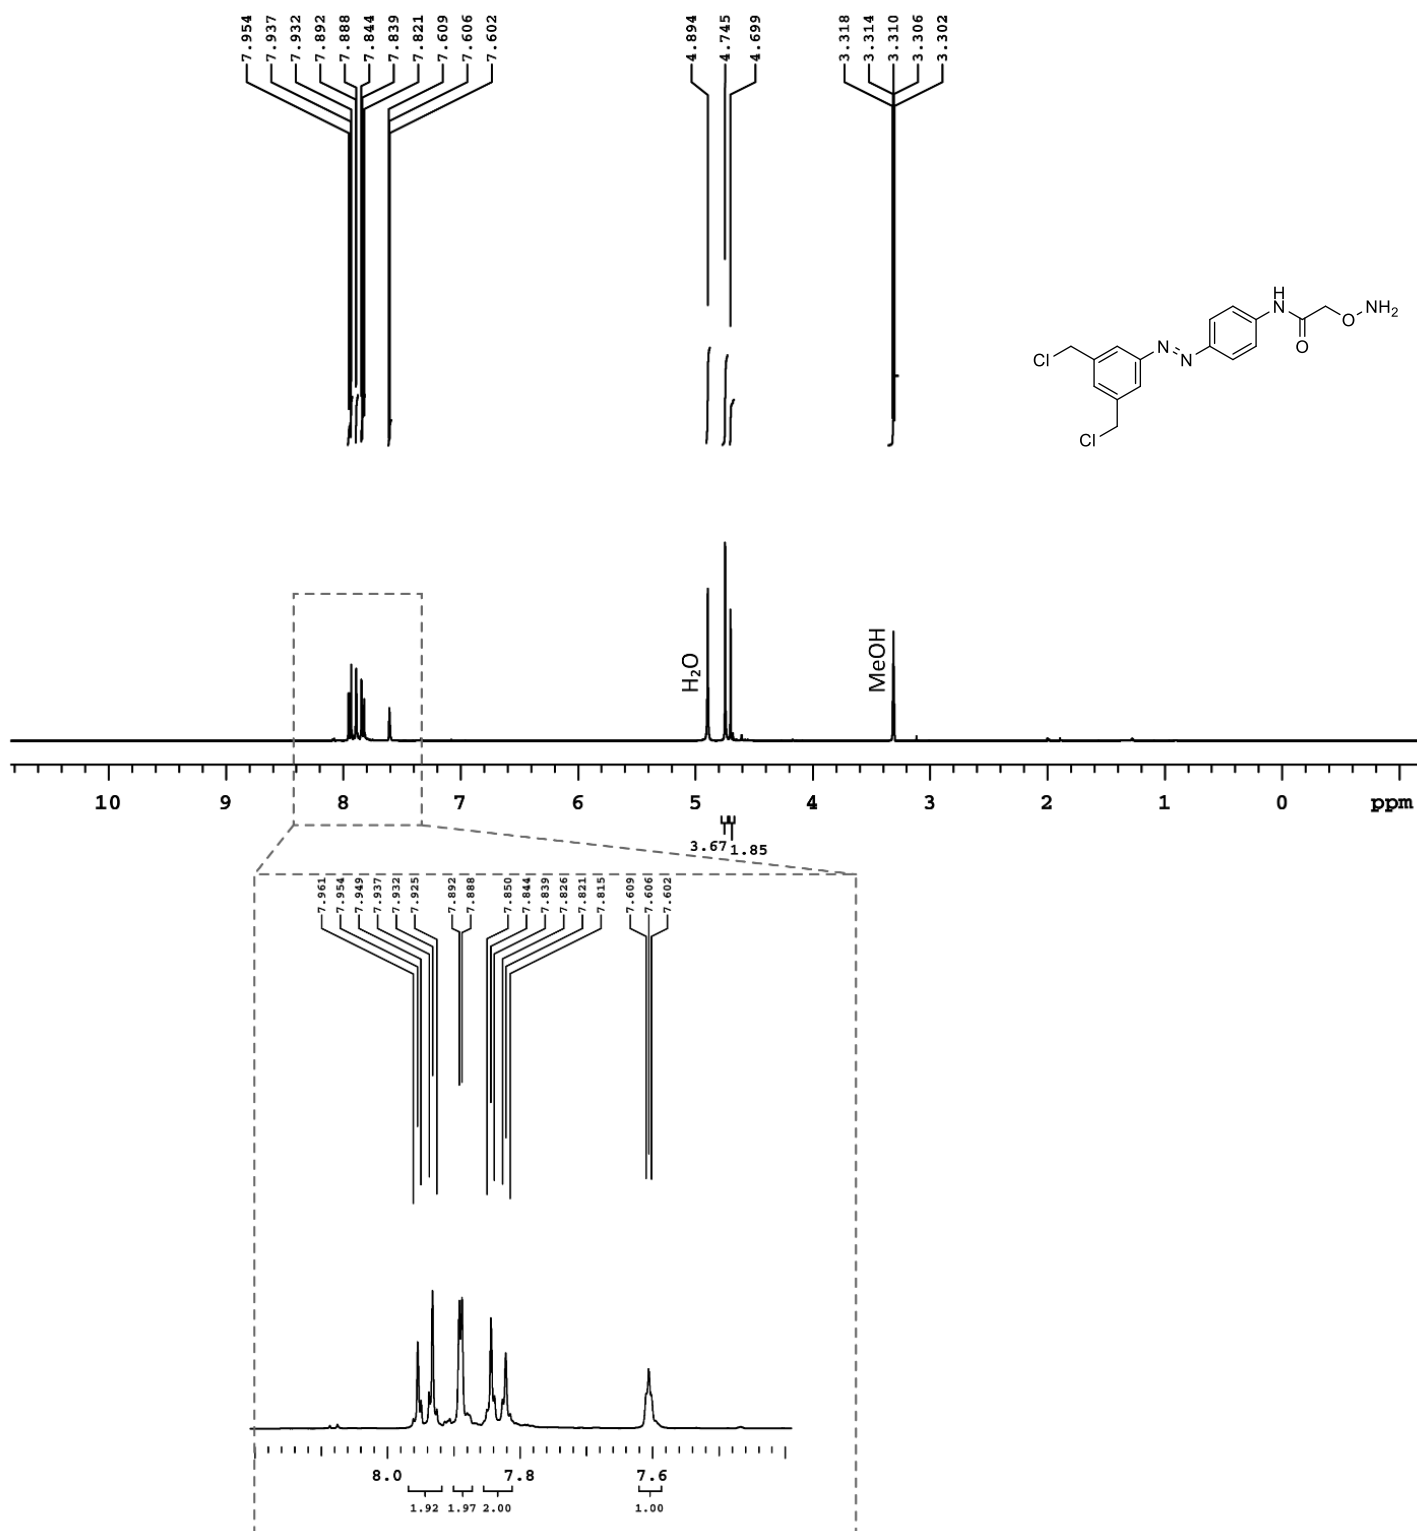

# <sup>13</sup>C-NMR of **2j**

100.588 MHz C13[H1] 1D in cd3od (ref. to CD3OD @ 49.0 ppm), temp 25.9 C -> actual temp = 27.0 C, onenmr probe!

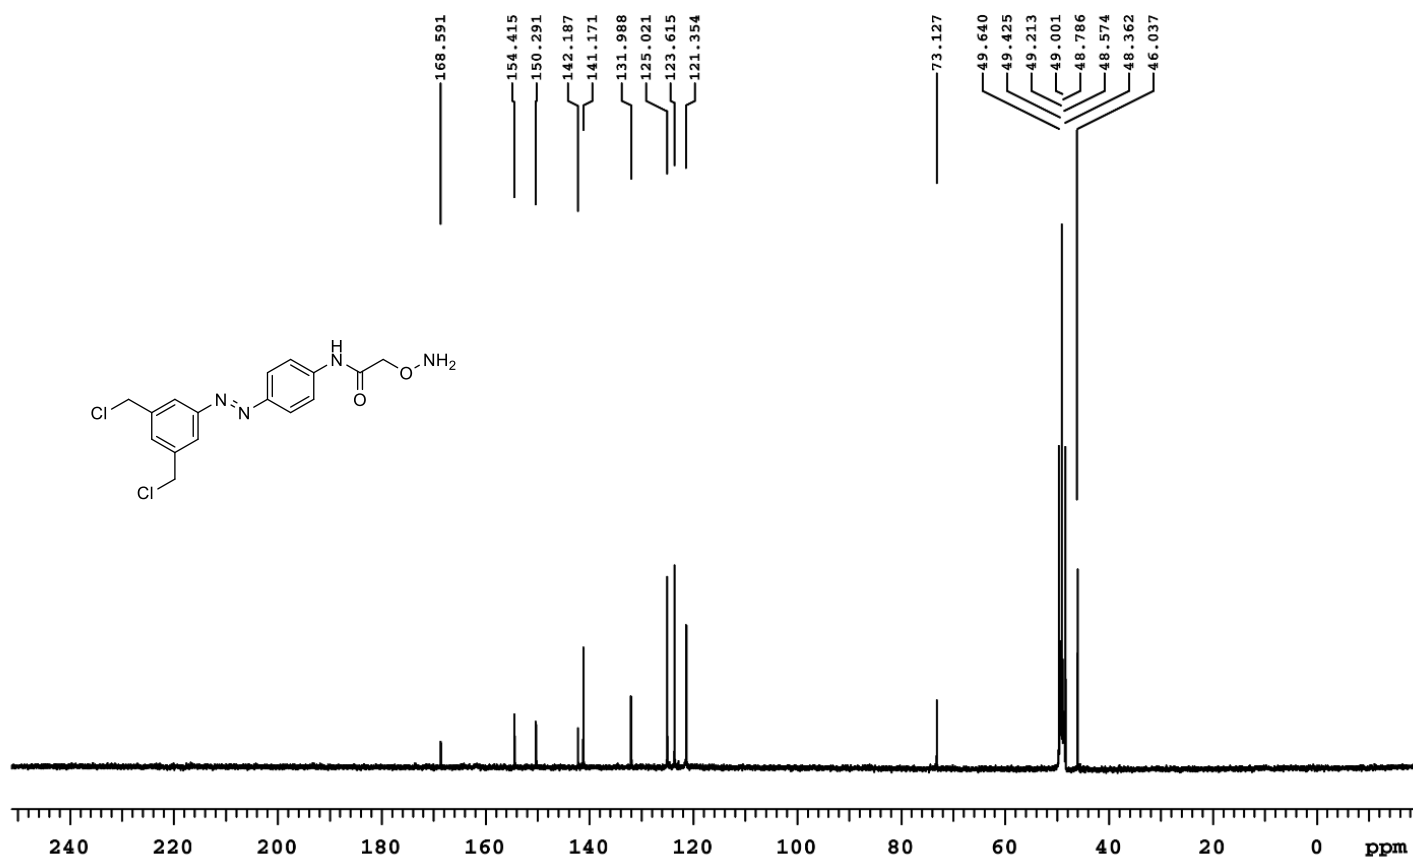

List of  $^1\text{H}$ -NMR signals of in **3d**

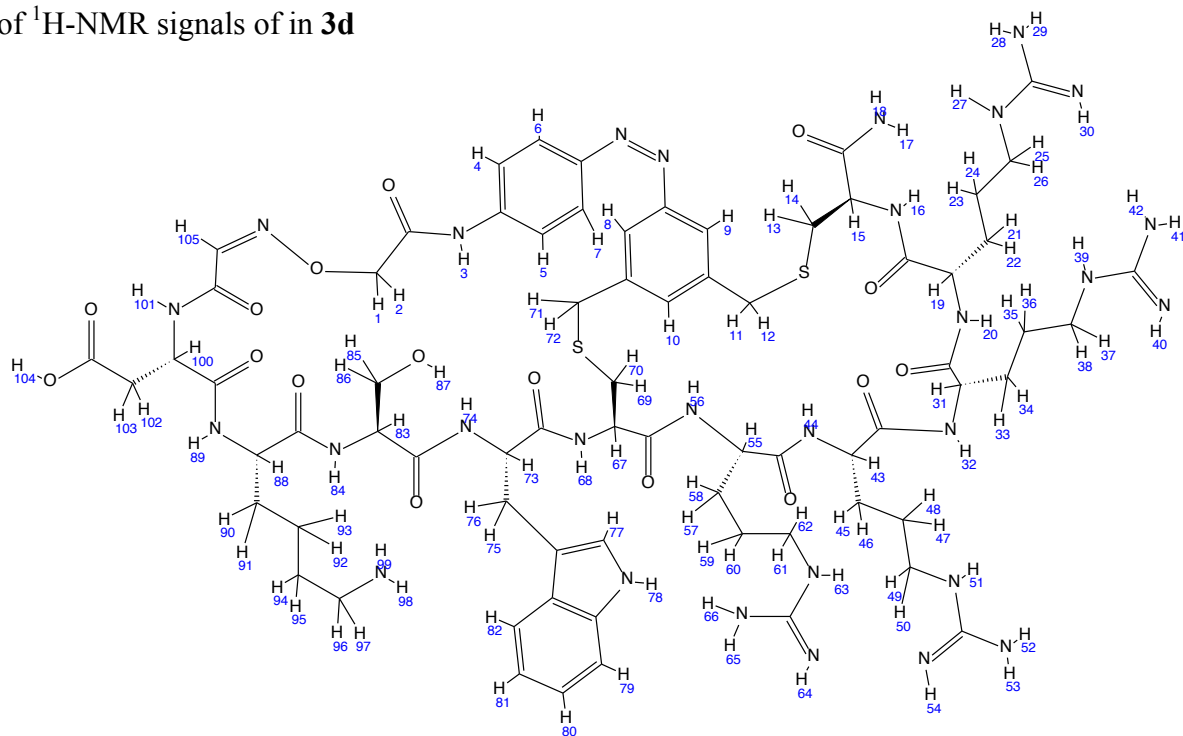

| Residue  | NH  | ppm  | H <sub>α</sub> | ppm  | H <sub>β</sub> | ppm        | H <sub>γ</sub> | ppm  | H <sub>δ</sub> | ppm  | H <sub>ε</sub> | ppm  |
|----------|-----|------|----------------|------|----------------|------------|----------------|------|----------------|------|----------------|------|
| Asp      | 101 | 8.31 | 100            | 4.66 | 102,103        | 2.81       | ---            | ---  | ---            | ---  | ---            | ---  |
| Lys      | 89  | 7.65 | 88             | 4.15 | 90,91          | 1.53, 1.38 | 92, 93         | 1.38 | 94, 95         | 2.71 | 96, 07         | 3.01 |
| Ser      | 84  | 7.76 | 83             | 4.2  | 85,86          | 3.58       | ---            | ---  | ---            | ---  | ---            | ---  |
| Trp      | 74  | 7.56 | 73             | 4.34 | 75,76          | 3.05, 2.96 | ---            | ---  | ---            | ---  | ---            | ---  |
| Cys      | 68  | 7.93 | 67             | 4.5  | 69,70          | 2.87, 2.66 | ---            | ---  | ---            | ---  | ---            | ---  |
| Arg      | 56  | 7.74 | 55             | 4.26 | 57,58          | 1.7, 1.63  | 59, 60         | 1.47 | 61, 62         | 3.06 | 63-66          | 7.02 |
| Arg      | 44  | 7.77 | 43             | 4.08 | 45,46          | 1.74, 1.61 | 47, 48         | 1.46 | 49, 50         | 3.01 | 51-54          | 7.06 |
| Arg      | 32  | 7.68 | 31             | 4.12 | 33,34          | 1.78, 1.63 | 35, 36         | 1.48 | 37, 38         | 3.03 | 39-42          | 7.05 |
| Arg      | 20  | 7.98 | 19             | 4.05 | 21,22          | 1.78, 1.57 | 23, 24         | 1.48 | 25, 26         | 3.03 | 27-30          | 7.07 |
| Cys      | 16  | 7.62 | 15             | 4.15 | 13,14          | 2.72, 2.53 | ---            | ---  | ---            | ---  | ---            | ---  |
|          |     |      |                |      |                |            |                |      |                |      |                |      |
| Trp (Ar) | 77  | 9.79 | 78             | 7.01 | 79             | 7.32       | 80             | 7.03 | 81             | 6.93 | 82             | 7.38 |
| HADCAz   | 1,2 | 4.76 | 71, 72         | 3.83 | 11,12          | 3.71       | ---            | ---  | ---            | ---  | ---            | ---  |
|          | 3   | 9.67 | ---            | ---  | ---            | ---        | ---            | ---  | ---            | ---  | ---            | ---  |
|          | 4,5 | 7.59 | 6,7            | 7.73 | ---            | ---        | ---            | ---  | ---            | ---  | ---            | ---  |
|          | 8   | 7.65 | 9              | 7.61 | 10             | 7.32       | ---            | ---  | ---            | ---  | ---            | ---  |
|          | 105 | 6.86 | ---            | ---  | ---            | ---        | ---            | ---  | ---            | ---  | ---            | ---  |

$^1\text{H}$ -NMR of **3d**

699.765 MHz H1 water\_ES in cd3cn[]

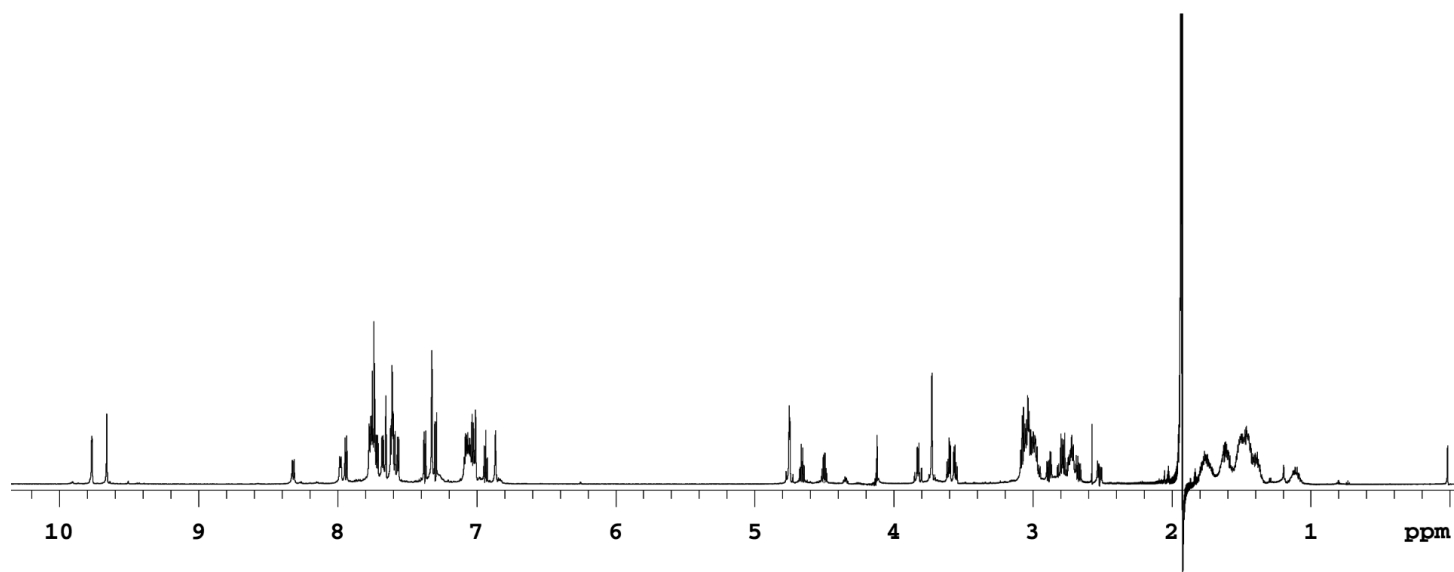

# TOCSY-NMR of **3d**

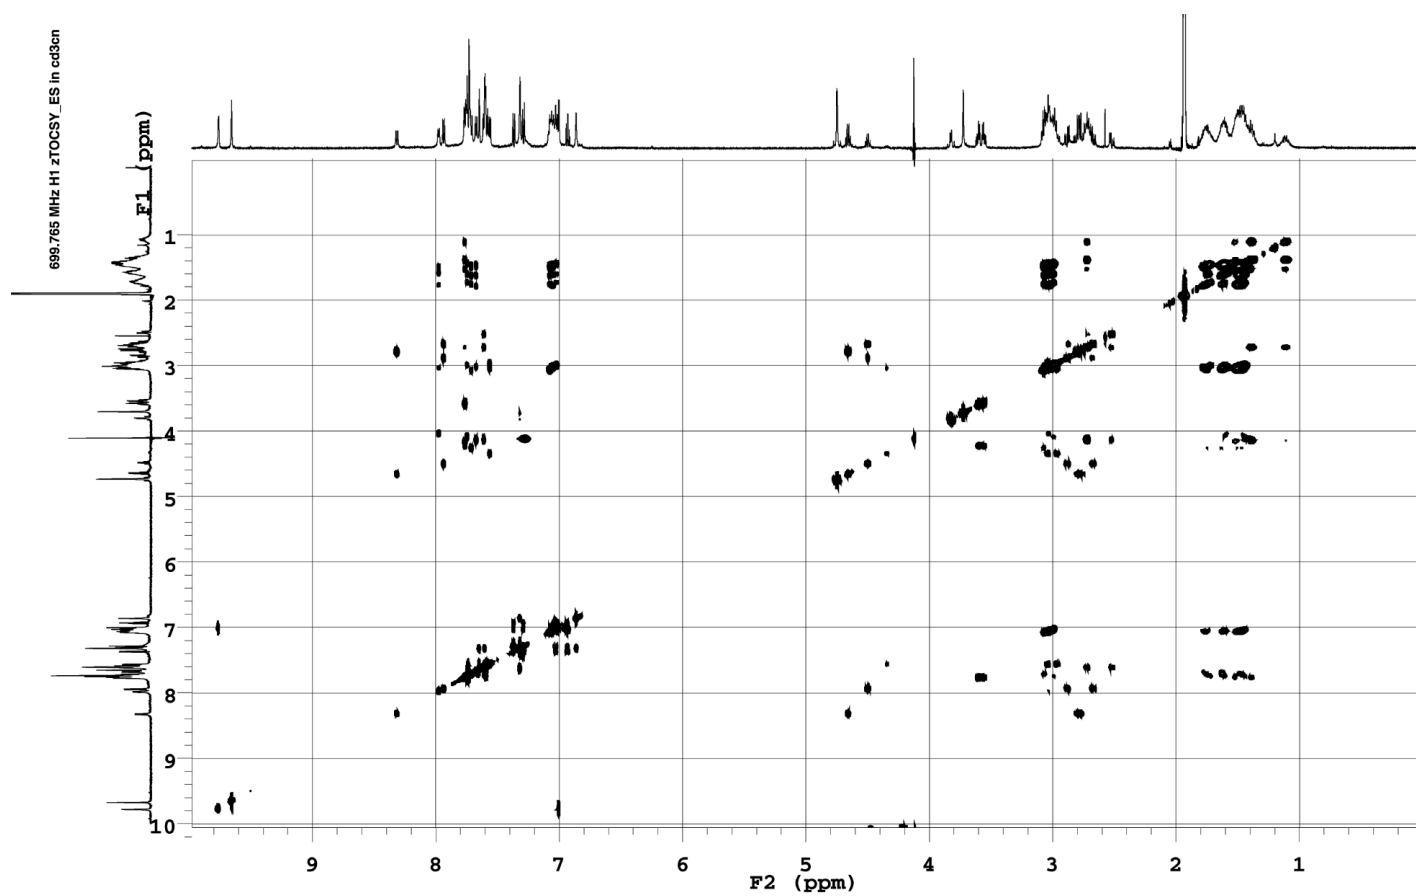

TOCSY-NMR of **3d** (expanded)

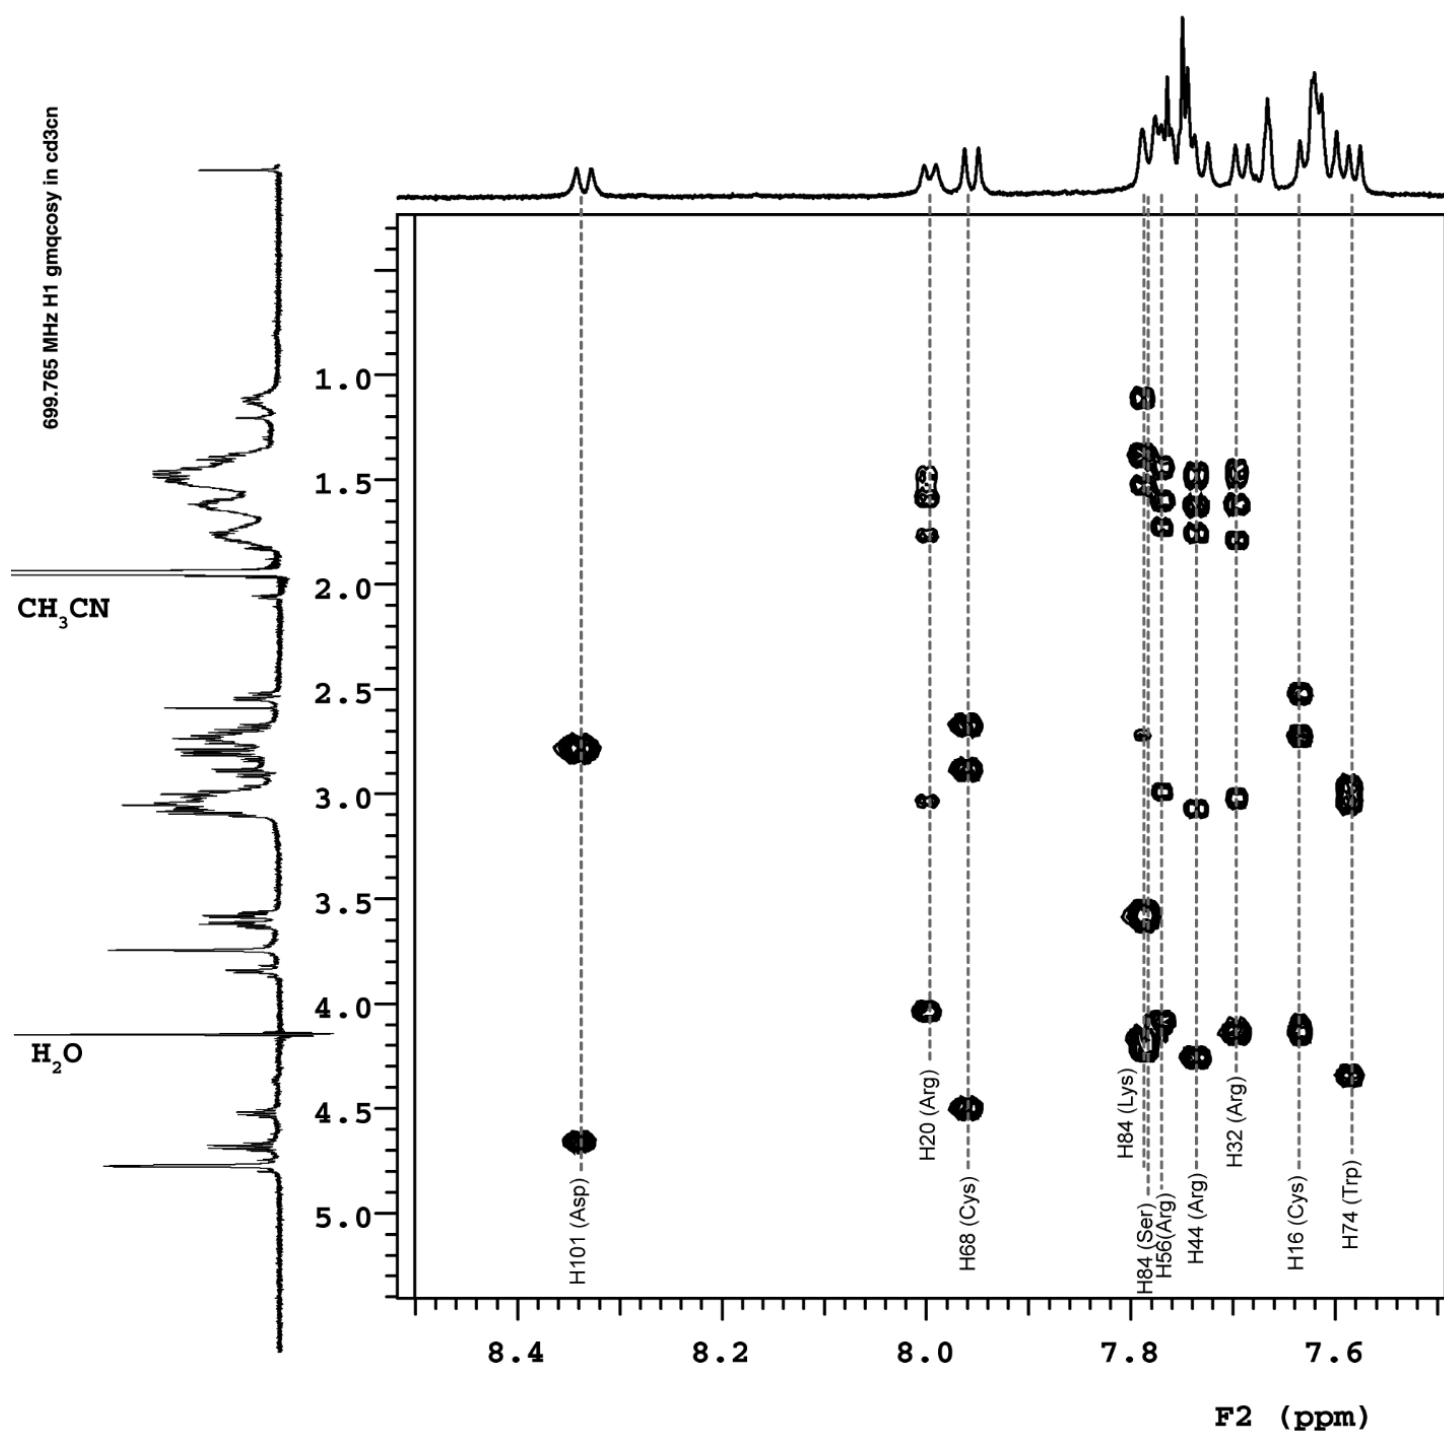

gmCOSY-NMR of **3d**

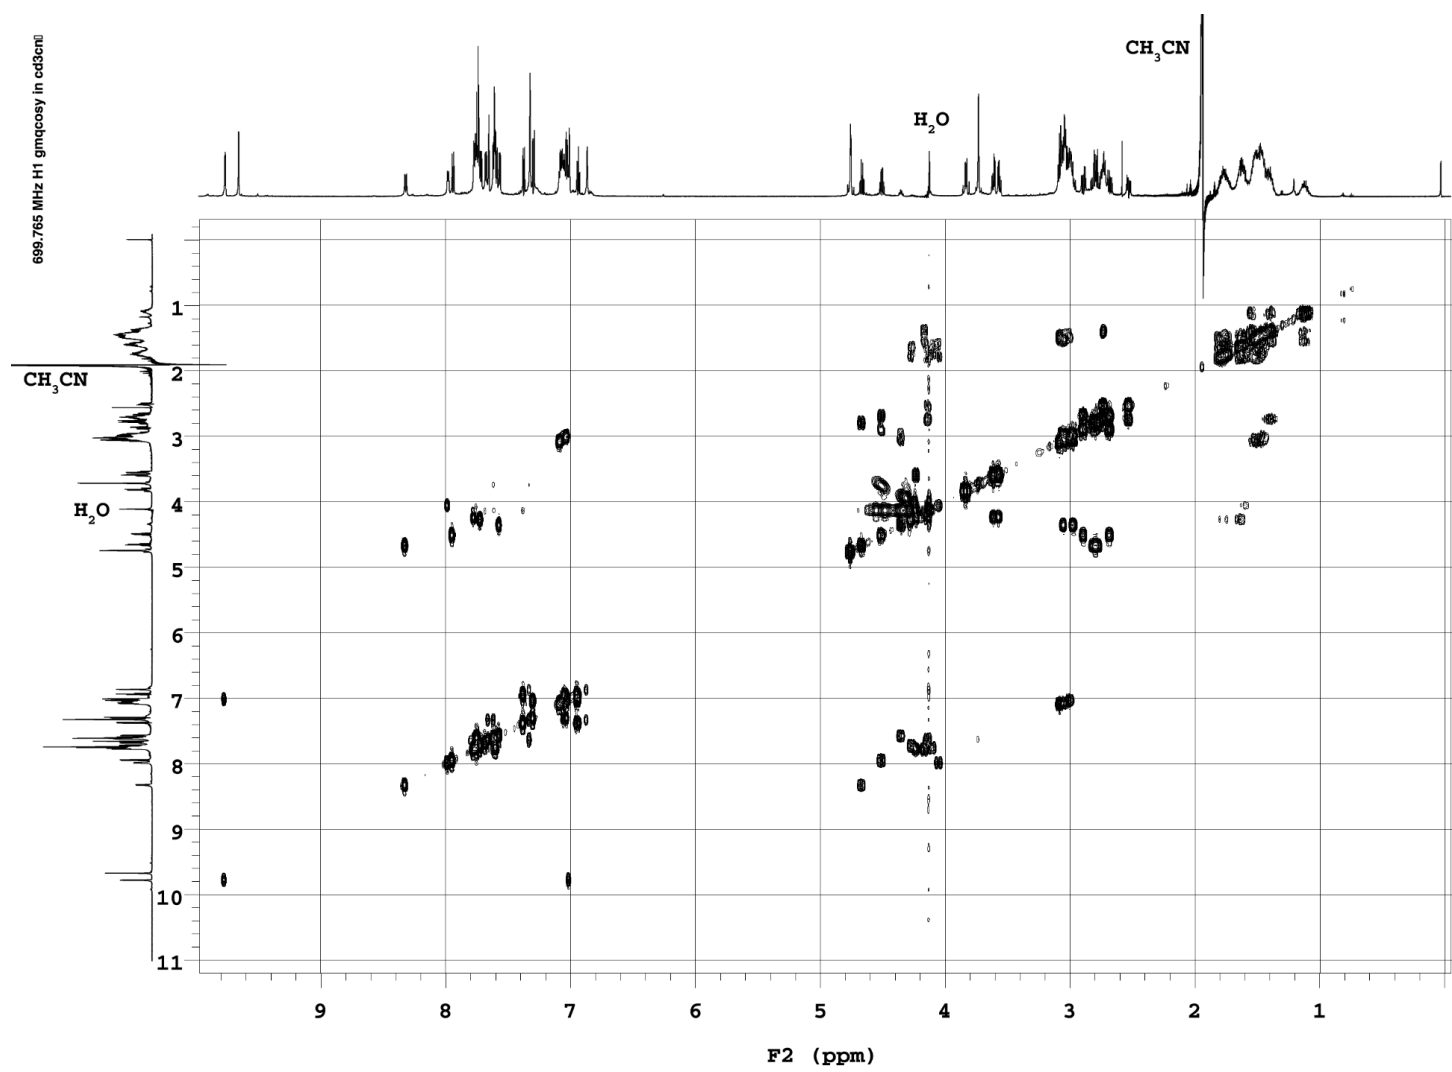

# NOESY-NMR of **3d**

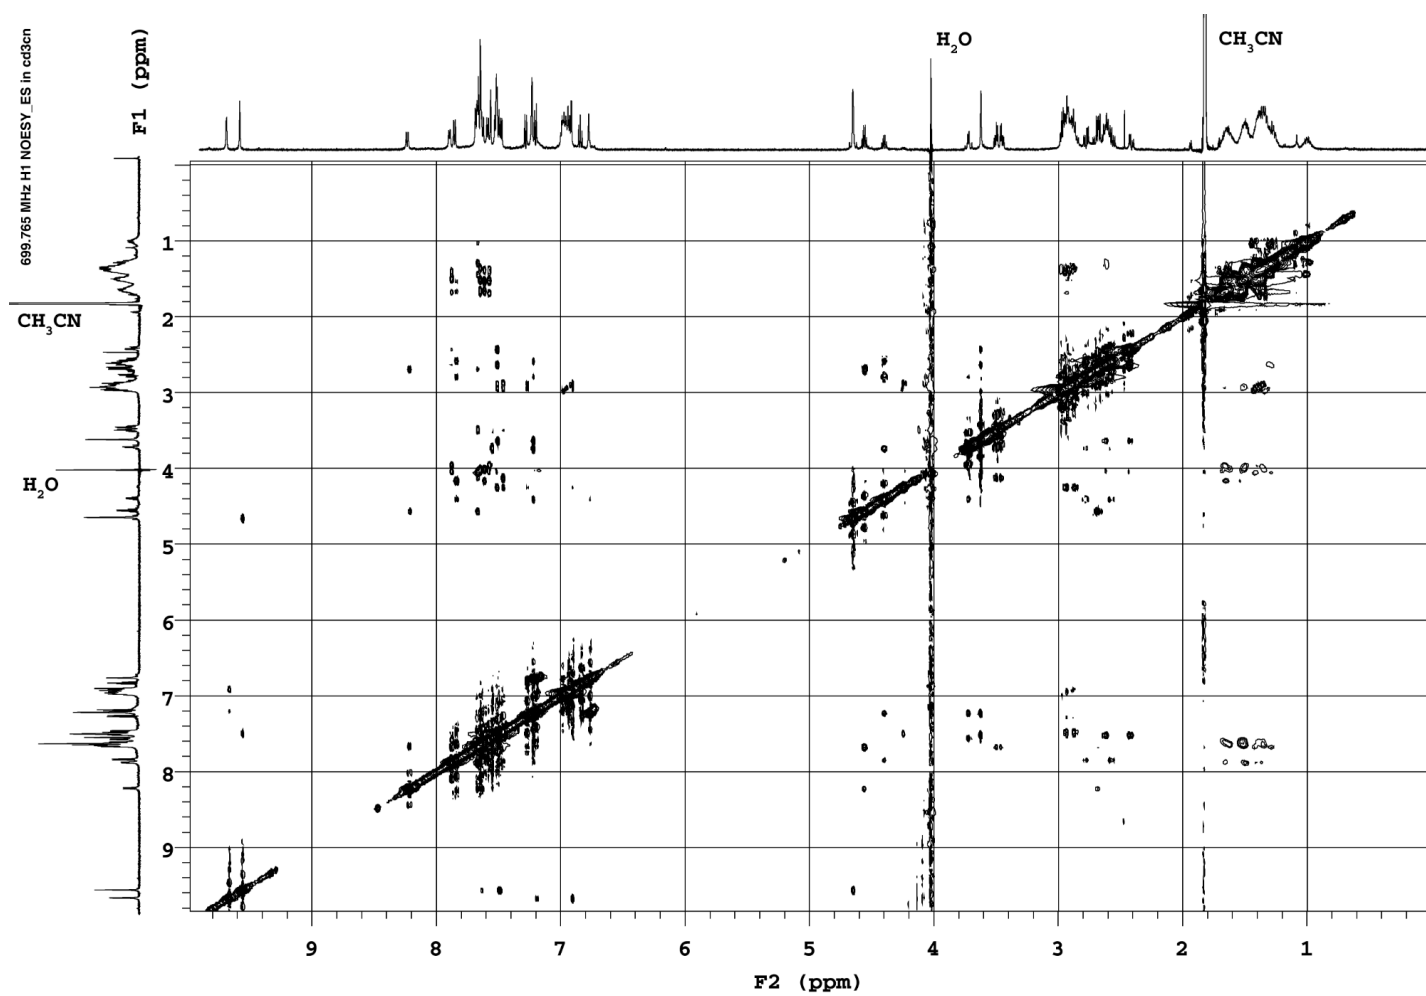

List of <sup>1</sup>H-NMR signals of in **3c**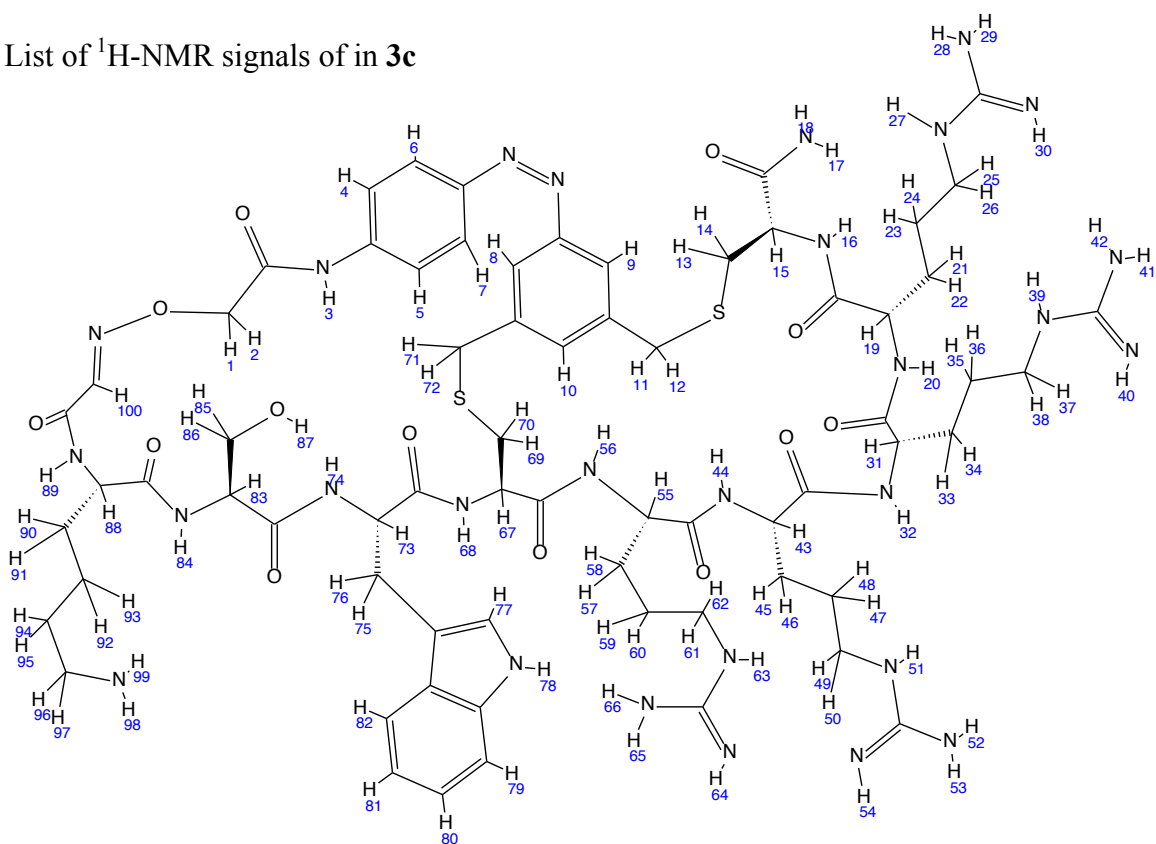

| Residue  | NH   | ppm  | H <sub>α</sub> | ppm  | H <sub>β</sub> | ppm        | H <sub>γ</sub> | ppm  | H <sub>δ</sub> | ppm  | H <sub>ε</sub> | ppm  |
|----------|------|------|----------------|------|----------------|------------|----------------|------|----------------|------|----------------|------|
| Lys      | 89   | 8.05 | 88             | 4.35 | 90, 91         | 1.67, 1.54 | 92, 93         | 1.24 | 94, 95         | 1.54 | 96, 97         | 2.82 |
| Ser      | 84   | 7.62 | 83             | 4.27 | 85, 86         | 3.34, 3.43 | ---            | ---  | ---            | ---  | ---            | ---  |
| Trp      | 74   | 7.75 | 73             | 4.56 | 75, 76         | 3.13, 3.08 | ---            | ---  | ---            | ---  | ---            | ---  |
| Cys      | 68   | 7.90 | 67             | 4.52 | 69, 70         | 2.88, 2.60 | ---            | ---  | ---            | ---  | ---            | ---  |
| Arg      | 56   | 7.78 | 55             | 4.08 | 57, 58         | 1.74, 1.62 | 59, 60         | 1.43 | 61, 62         | 3.01 | 63-66          | 7.09 |
| Arg      | 44   | 7.66 | 43             | 4.12 | 45, 46         | 1.80, 1.63 | 47, 48         | 1.49 | 49, 50         | 3.07 | 51-54          | 7.04 |
| Arg      | 32   | 7.66 | 31             | 4.25 | 33, 34         | 1.80, 1.63 | 35, 36         | 1.49 | 37, 38         | 3.07 | 39-42          | 7.08 |
| Arg      | 20   | 7.98 | 19             | 4.06 | 21, 22         | 1.77, 1.57 | 23, 24         | 1.50 | 25, 26         | 3.07 | 27-30          | 7.09 |
| Cys      | 16   | 8.13 | 15             | 4.24 | 13, 14         | 2.59, 2.49 | ---            | ---  | ---            | ---  | ---            | ---  |
|          |      |      |                |      |                |            |                |      |                |      |                |      |
| Trp (Ar) | 77   | 9.81 | 78             | 7.05 | 79             | 7.3        | 80             | 7.04 | 81             | 6.96 | 82             | 7.43 |
| HADCAz   | 1, 2 | 4.72 | 71, 72         | 3.68 | 11, 12         | 3.83       | ---            | ---  | ---            | ---  | ---            | ---  |
|          | 3    | 9.63 | ---            | ---  | ---            | ---        | ---            | ---  | ---            | ---  | ---            | ---  |
|          | 4,5  | 7.62 | 6, 7           | 7.80 | ---            | ---        | ---            | ---  | ---            | ---  | ---            | ---  |
|          | 8    | 7.50 | 9              | 7.66 | 10             | 7.28       | ---            | ---  | ---            | ---  | ---            | ---  |
|          | 100  | 6.88 | ---            | ---  | ---            | ---        | ---            | ---  | ---            | ---  | ---            | ---  |

<sup>1</sup>H-NMR of **3c**

699.765 MHz H1 water\_ES in cd3cn

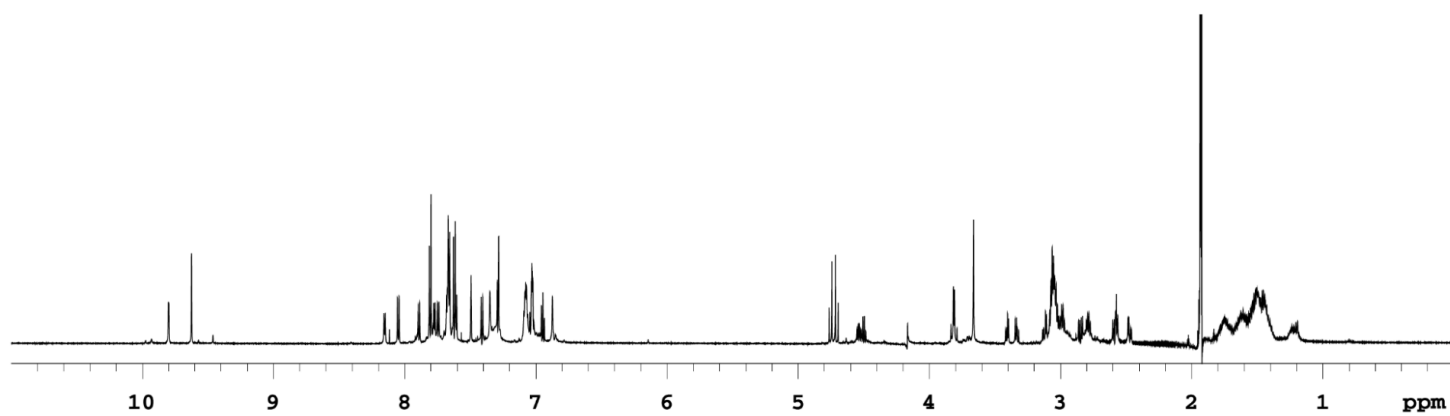

# TOCSY-NMR of **3c**

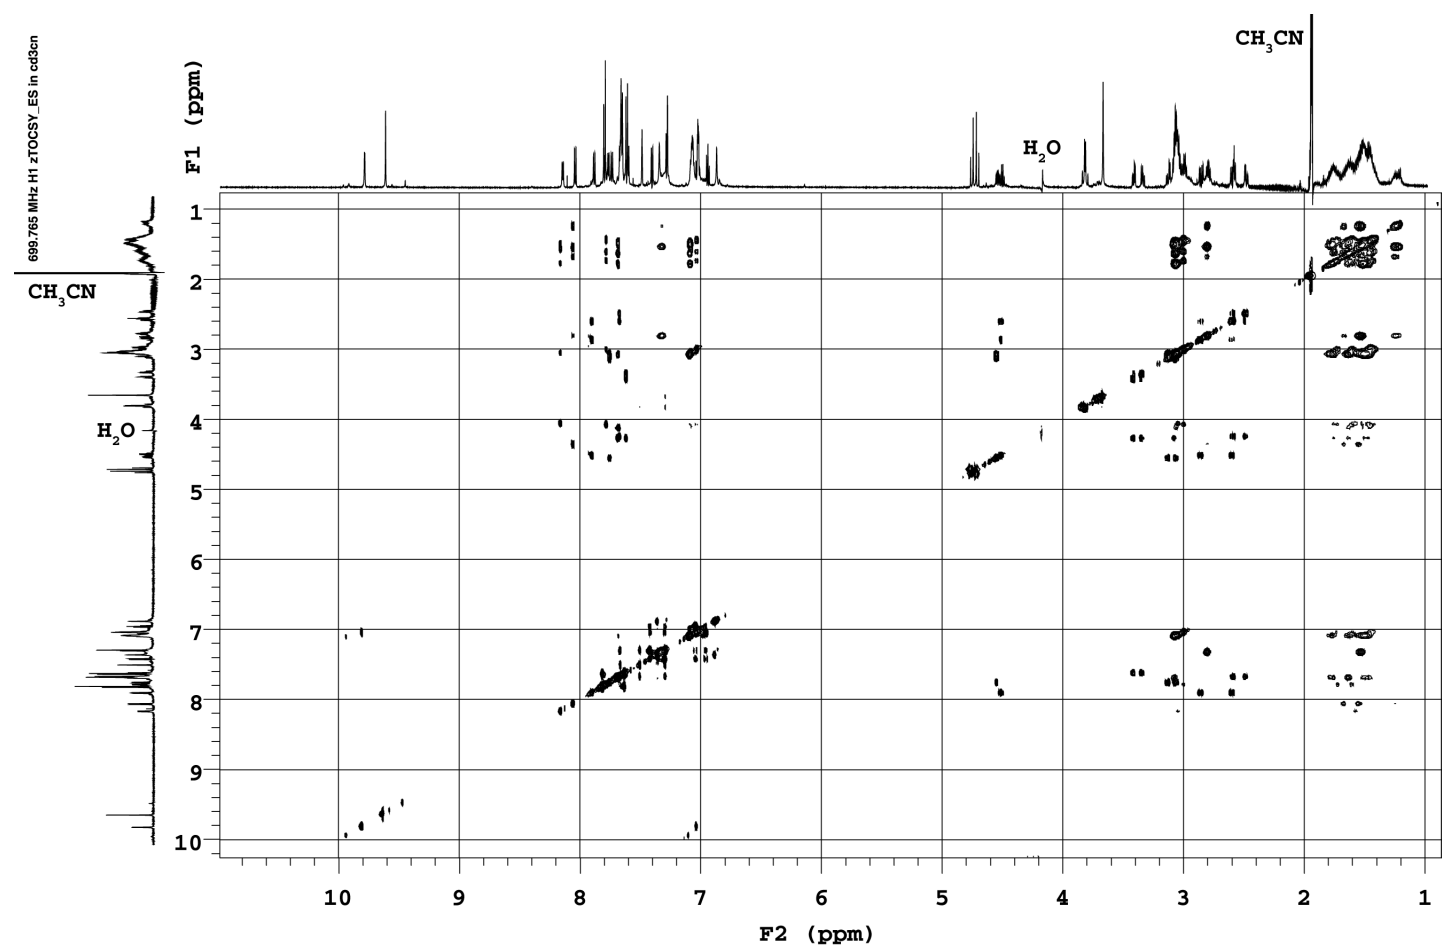

TOCSY-NMR of **3c** (expanded)

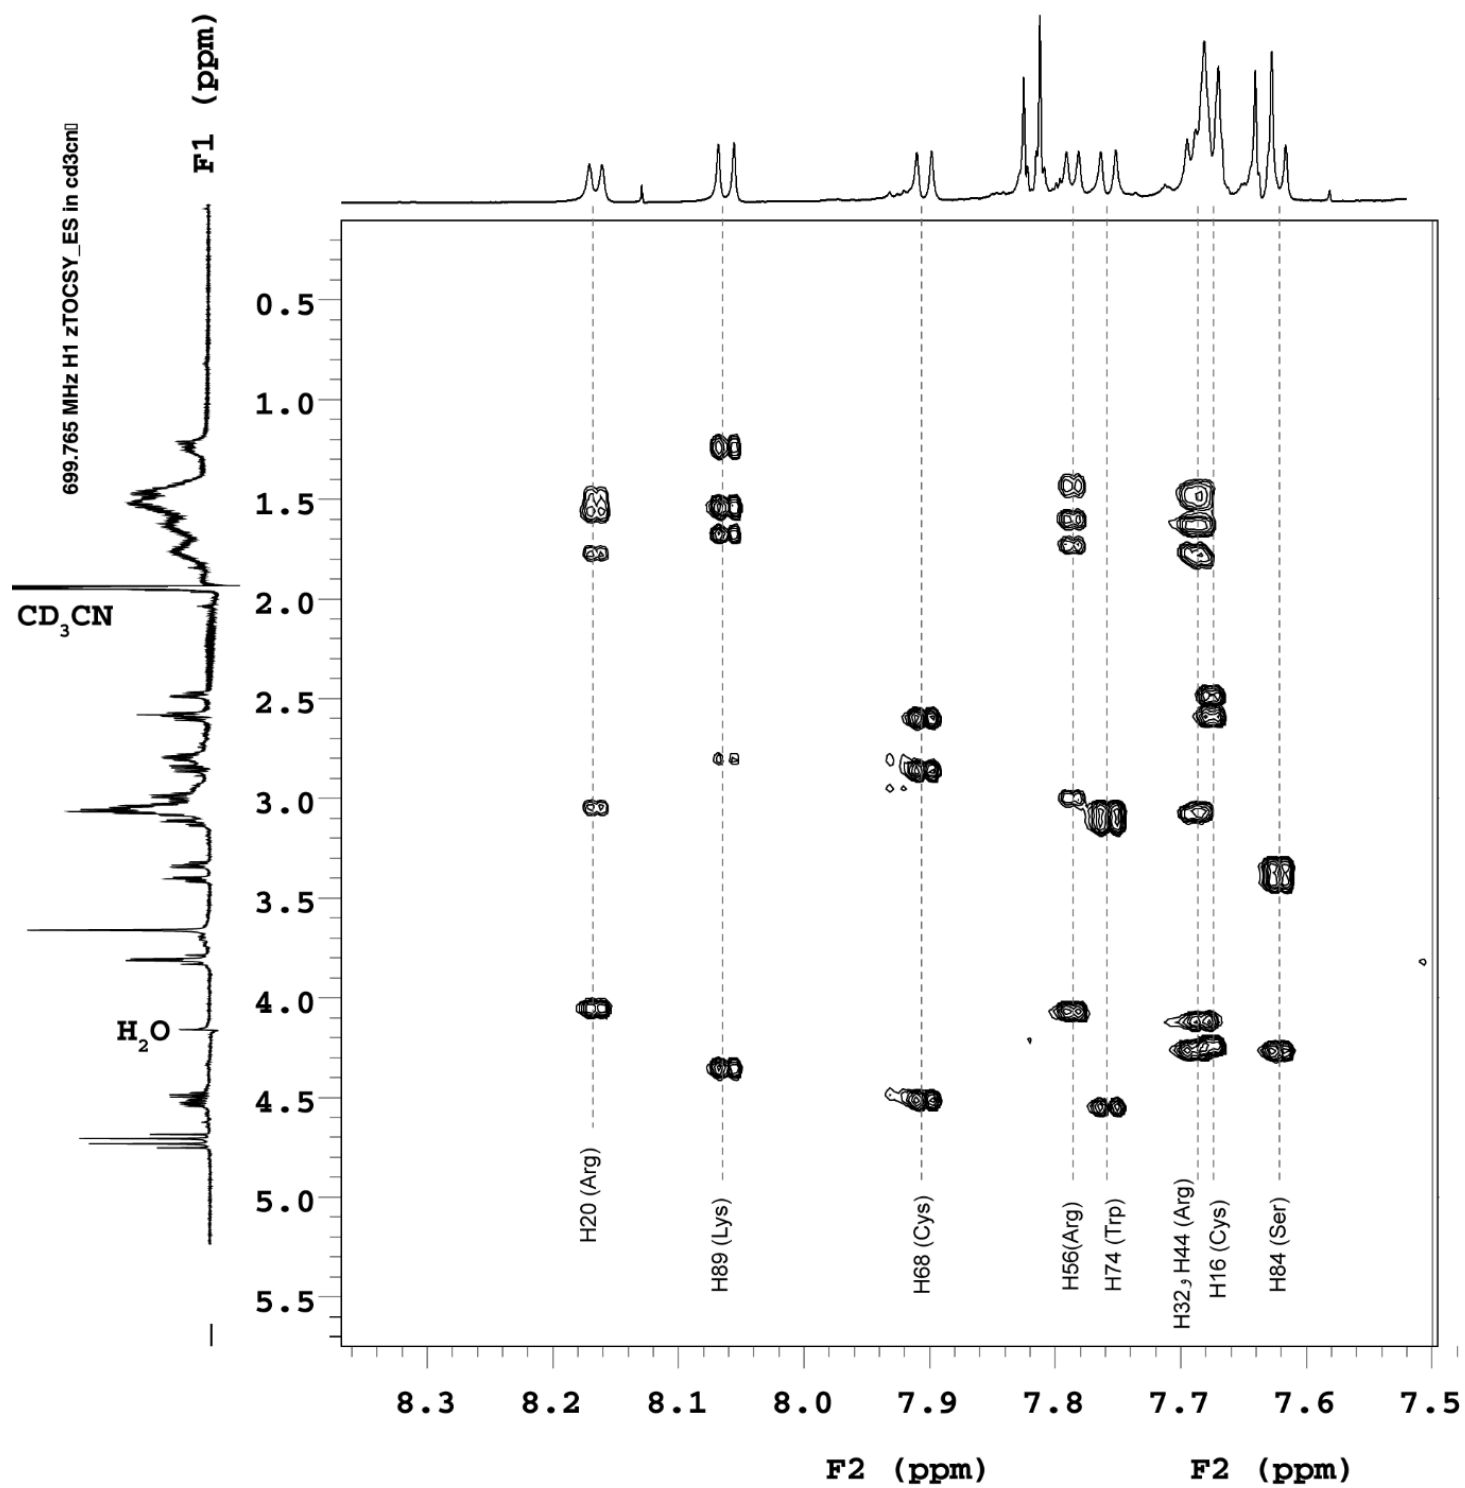

gmCOSY-NMR of **3c**

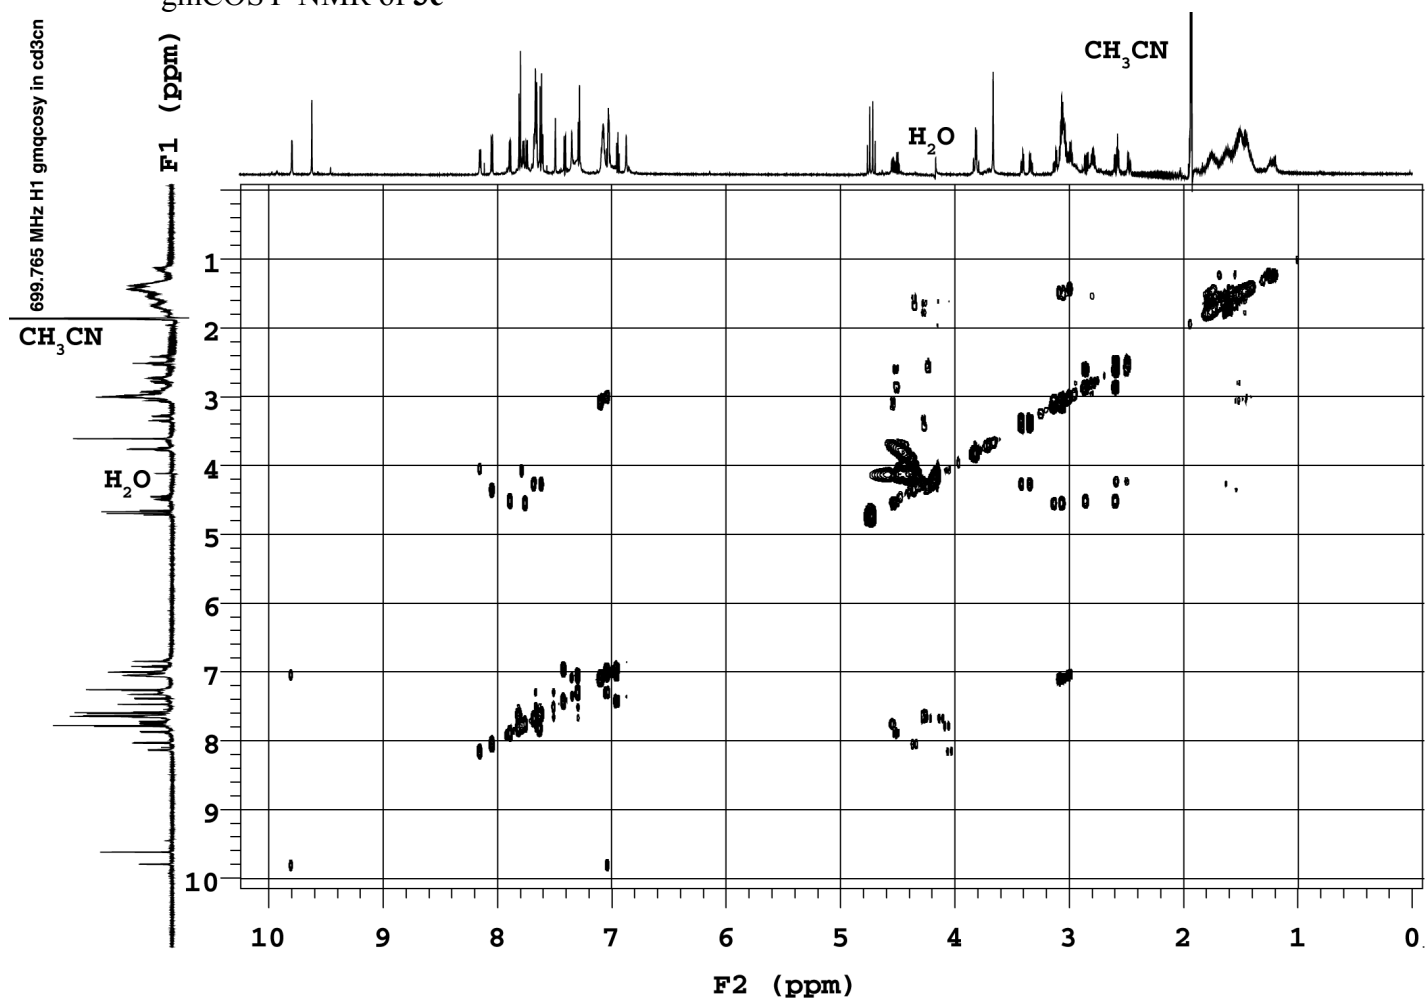

# NOESY-NMR of **3c**

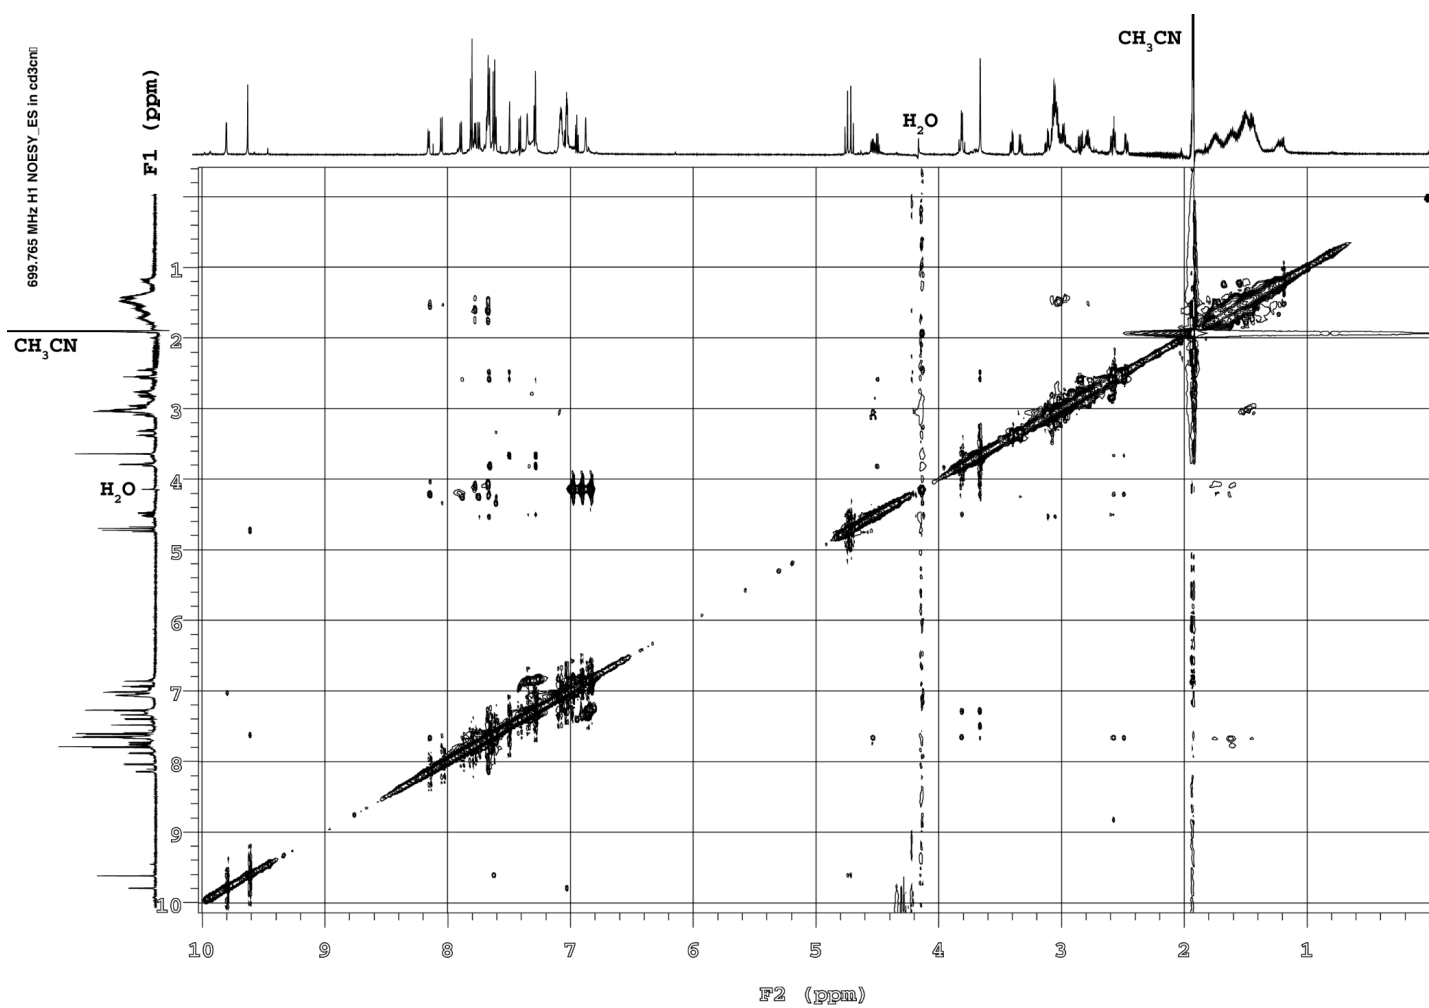

List of <sup>1</sup>H-NMR signals of in **3b**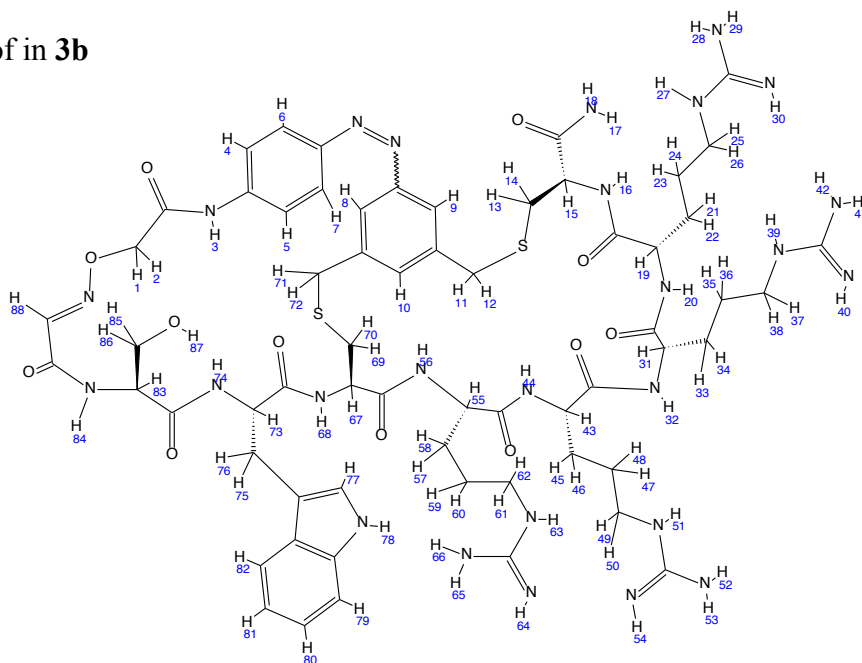

| Residue  | NH   | ppm  | H <sub>α</sub> | ppm  | H <sub>β</sub> | ppm           | H <sub>γ</sub> | ppm           | H <sub>δ</sub> | ppm  | H <sub>ε</sub> | ppm  |
|----------|------|------|----------------|------|----------------|---------------|----------------|---------------|----------------|------|----------------|------|
| Ser      | 84   | 7.34 | 83             | 4.03 | 85, 86         | 3.22          | ---            | ---           | ---            | ---  | ---            | ---  |
| Trp      | 74   | 7.55 | 73             | 4.67 | 75, 76         | 2.87,<br>3.06 | ---            | ---           | ---            | ---  | ---            | ---  |
| Cys      | 68   | 7.98 | 67             | 4.50 | 69, 70         | 2.82,<br>2.58 | ---            | ---           | ---            | ---  | ---            | ---  |
| Arg      | 56   | 7.65 | 55             | 4.26 | 57, 58         | 1.75,<br>1.60 | 59,<br>60      | 1.48          | 61,<br>62      | 3.06 | 63-<br>66      | 7.10 |
| Arg      | 44   | 7.75 | 43             | 4.19 | 45, 46         | 2.05,<br>1.67 | 47,<br>48      | 1.51,<br>1.52 | 49,<br>50      | 3.08 | 51-<br>54      | 7.07 |
| Arg      | 32   | 7.67 | 31             | 4.10 | 33, 34         | 1.76,<br>1.64 | 35,<br>36      | 1.45          | 37,<br>38      | 2.97 | 39-<br>42      | 7.00 |
| Arg      | 20   | 8.14 | 19             | 4.08 | 21, 22         | 1.78,<br>1.59 | 23,<br>24      | 1.59,<br>1.50 | 25,<br>26      | 3.05 | 27-<br>30      | 7.06 |
| Cys      | 16   | 7.68 | 15             | 4.09 | 13, 14         | 3.09,<br>2.89 | ---            | ---           | ---            | ---  | ---            | ---  |
|          |      |      |                |      |                |               |                |               |                |      |                |      |
| Trp (Ar) | 77   | 9.85 | 78             | 6.97 | 79             | 7.32          | 80             | 7.07          | 81             | 6.93 | 82             | 7.38 |
| HADCAz   | 1, 2 | 4.17 | 71,<br>72      | 3.82 | 11, 12         | 3.74          | ---            | ---           | ---            | ---  | ---            | ---  |
|          | 3    | 9.69 | ---            | ---  | ---            | ---           | ---            | ---           | ---            | ---  | ---            | ---  |
|          | 4,5  | 7.65 | 6,7            | 7.75 | ---            | ---           | ---            | ---           | ---            | ---  | ---            | ---  |
|          | 8    | 7.64 | 9              | 7.53 | 10             | 7.32          | ---            | ---           | ---            | ---  | ---            | ---  |
|          | 88   | 6.87 | ---            | ---  | ---            | ---           | ---            | ---           | ---            | ---  | ---            | ---  |

TOCSY-NMR of **3b**

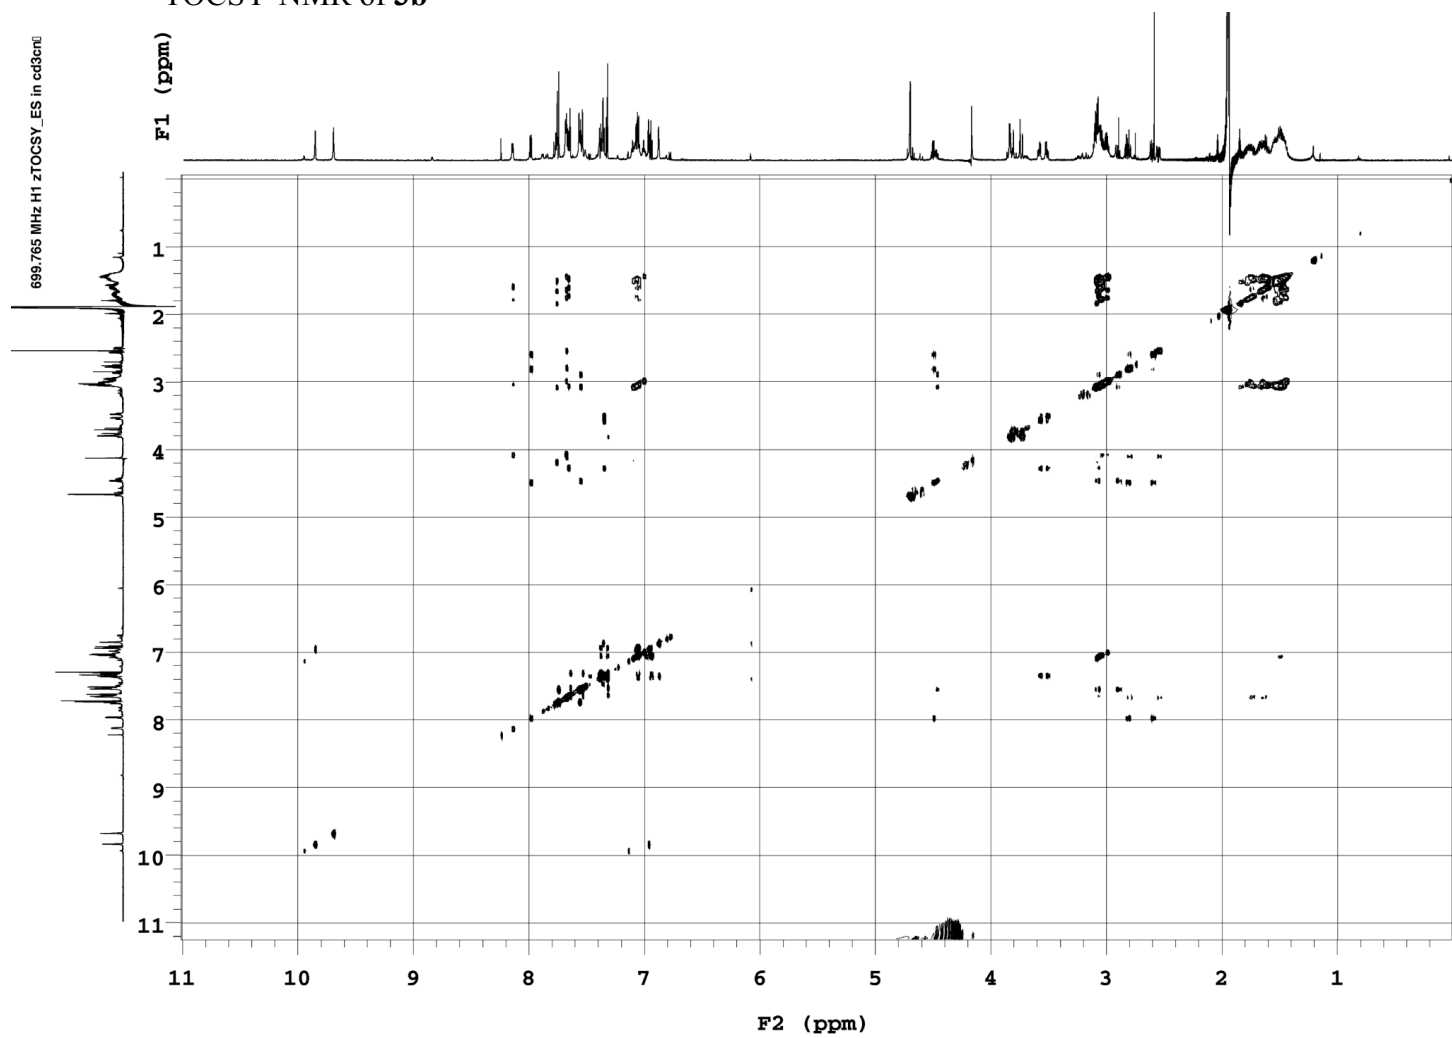

TOCSY-NMR of **3b** (expanded)

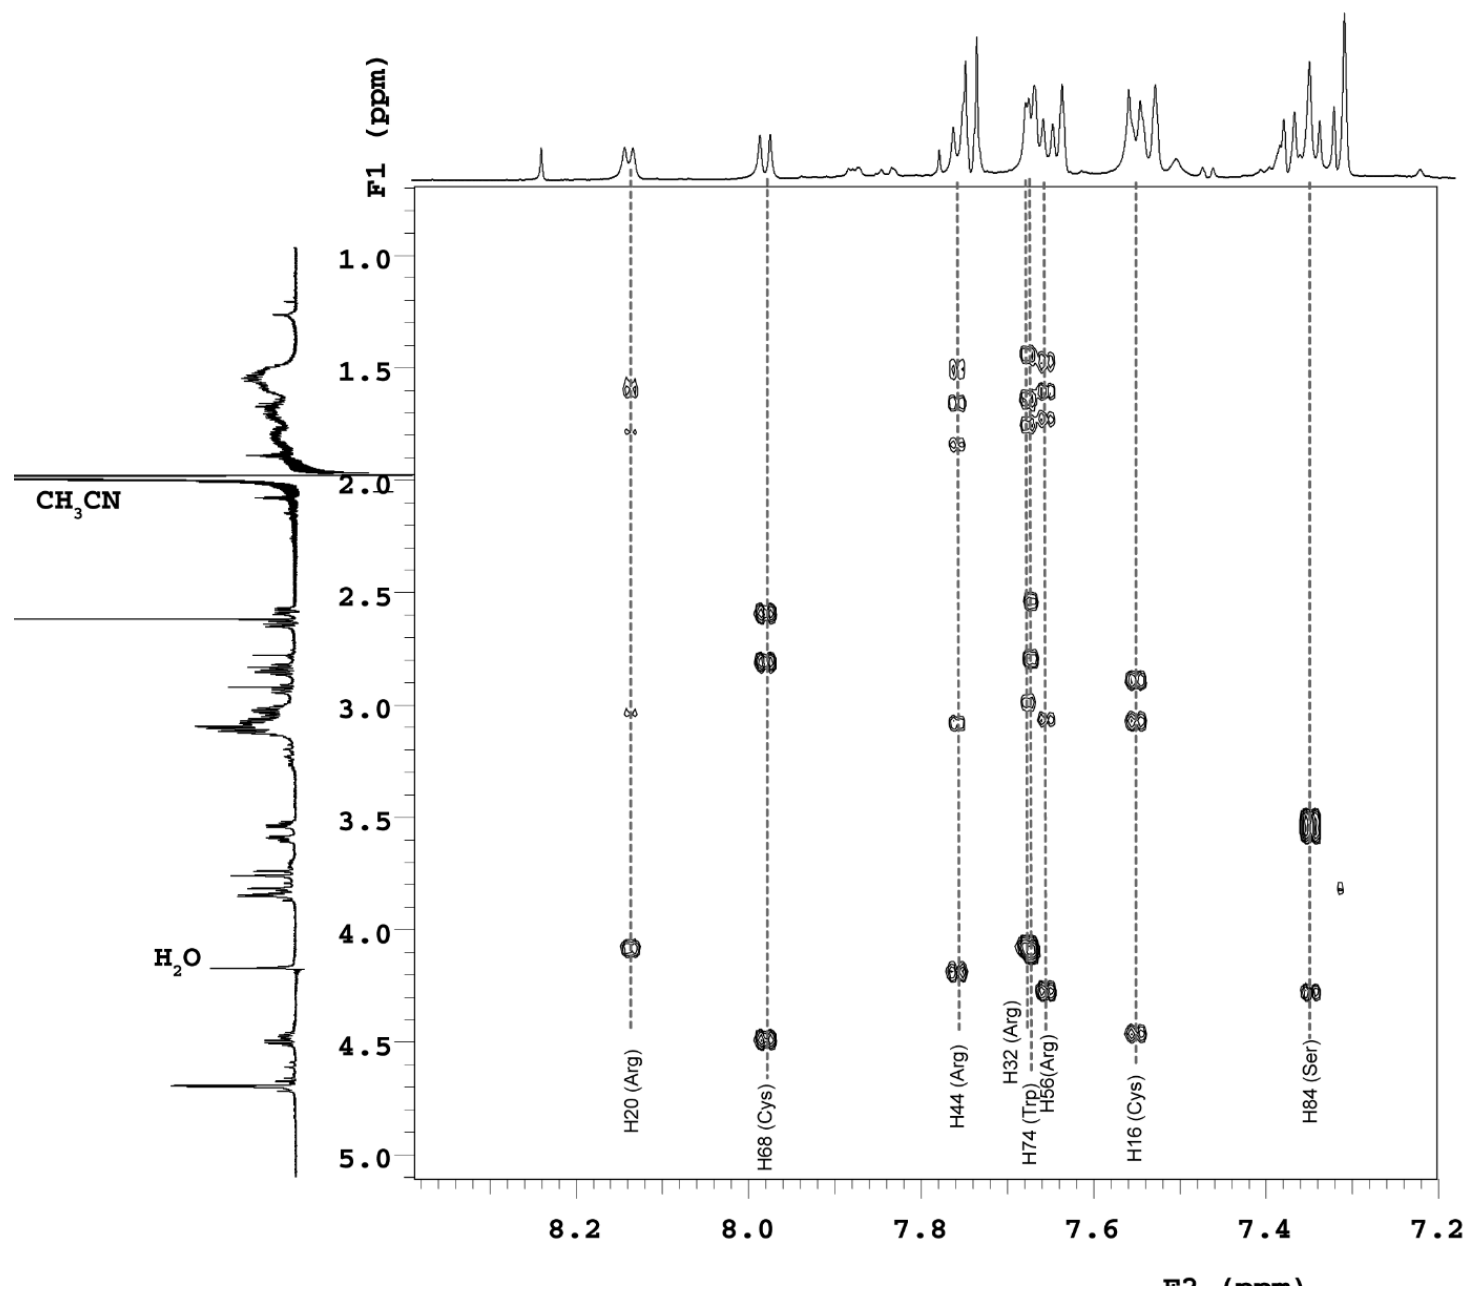

# COSY-NMR of **3b**

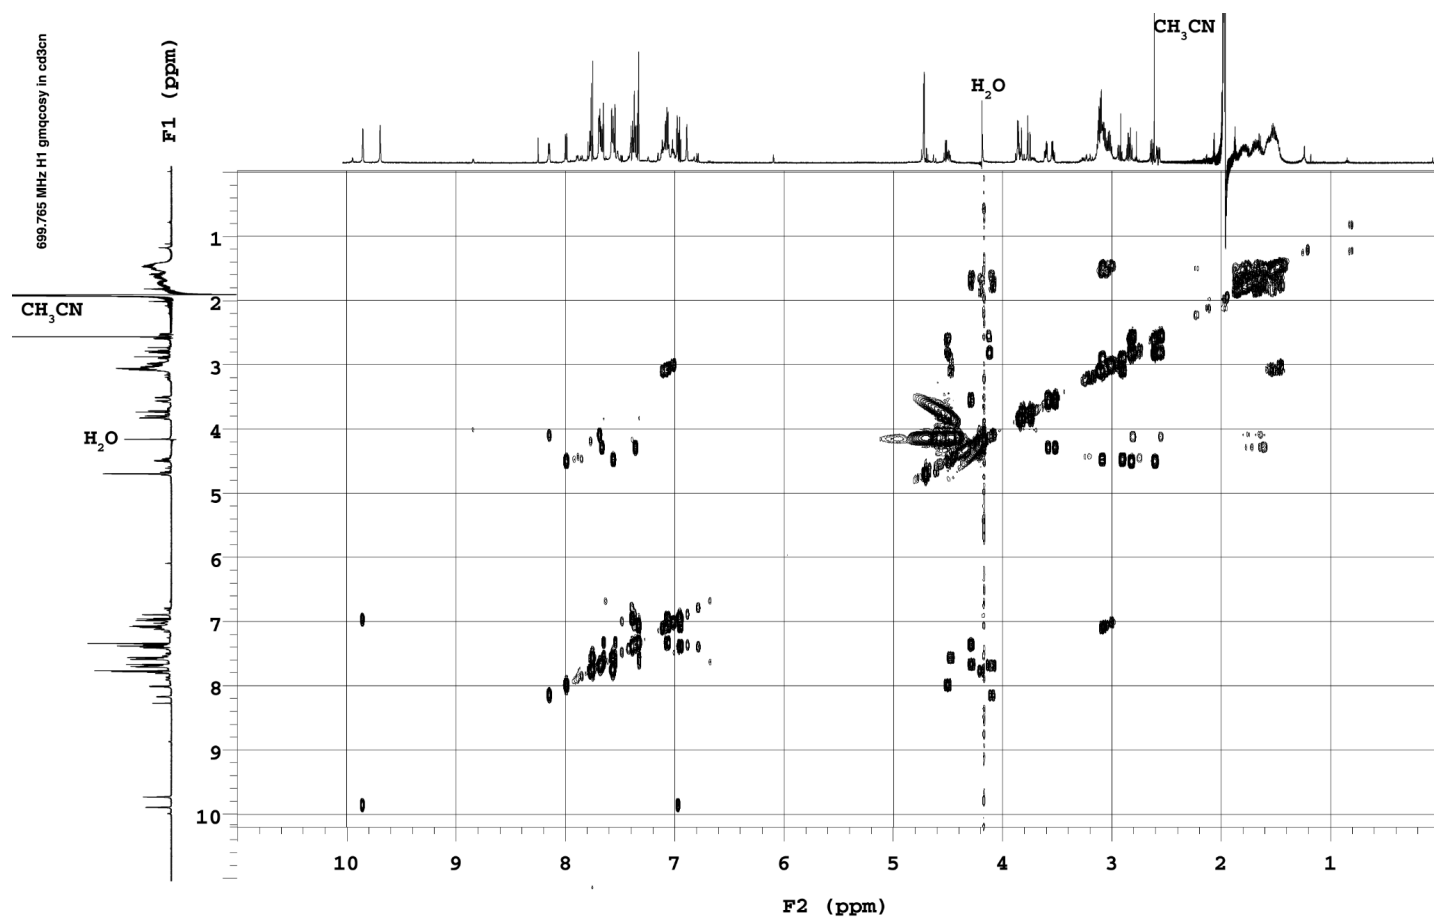

NOESY-NMR of **3b**

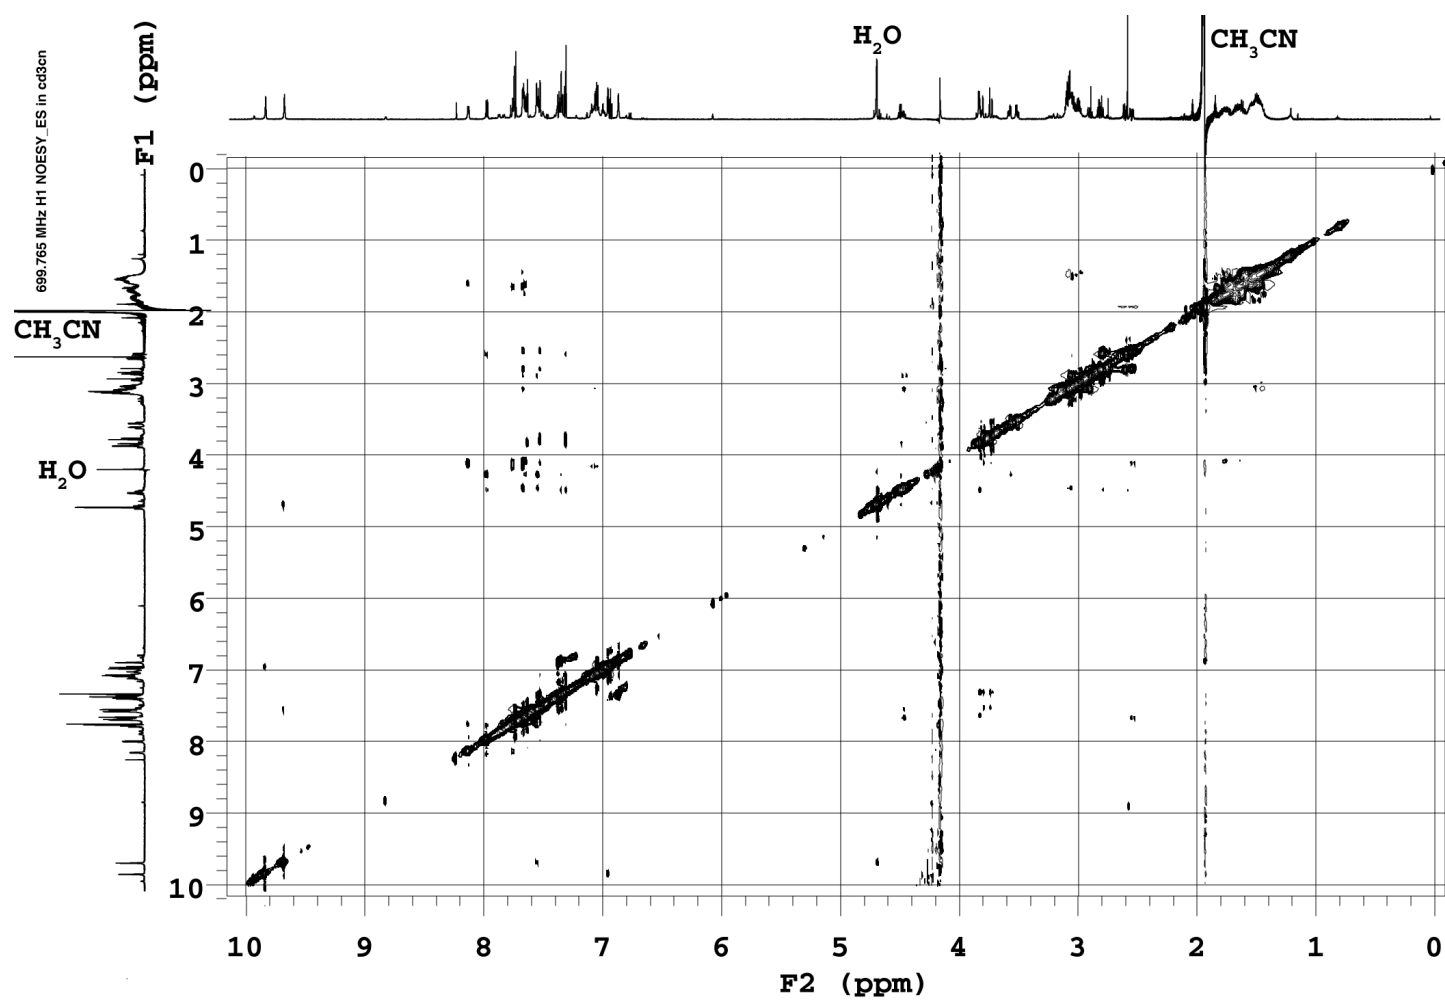

<sup>1</sup>H-NMR of **3a**

699.766 MHz H1 water\_ES in cd3cn

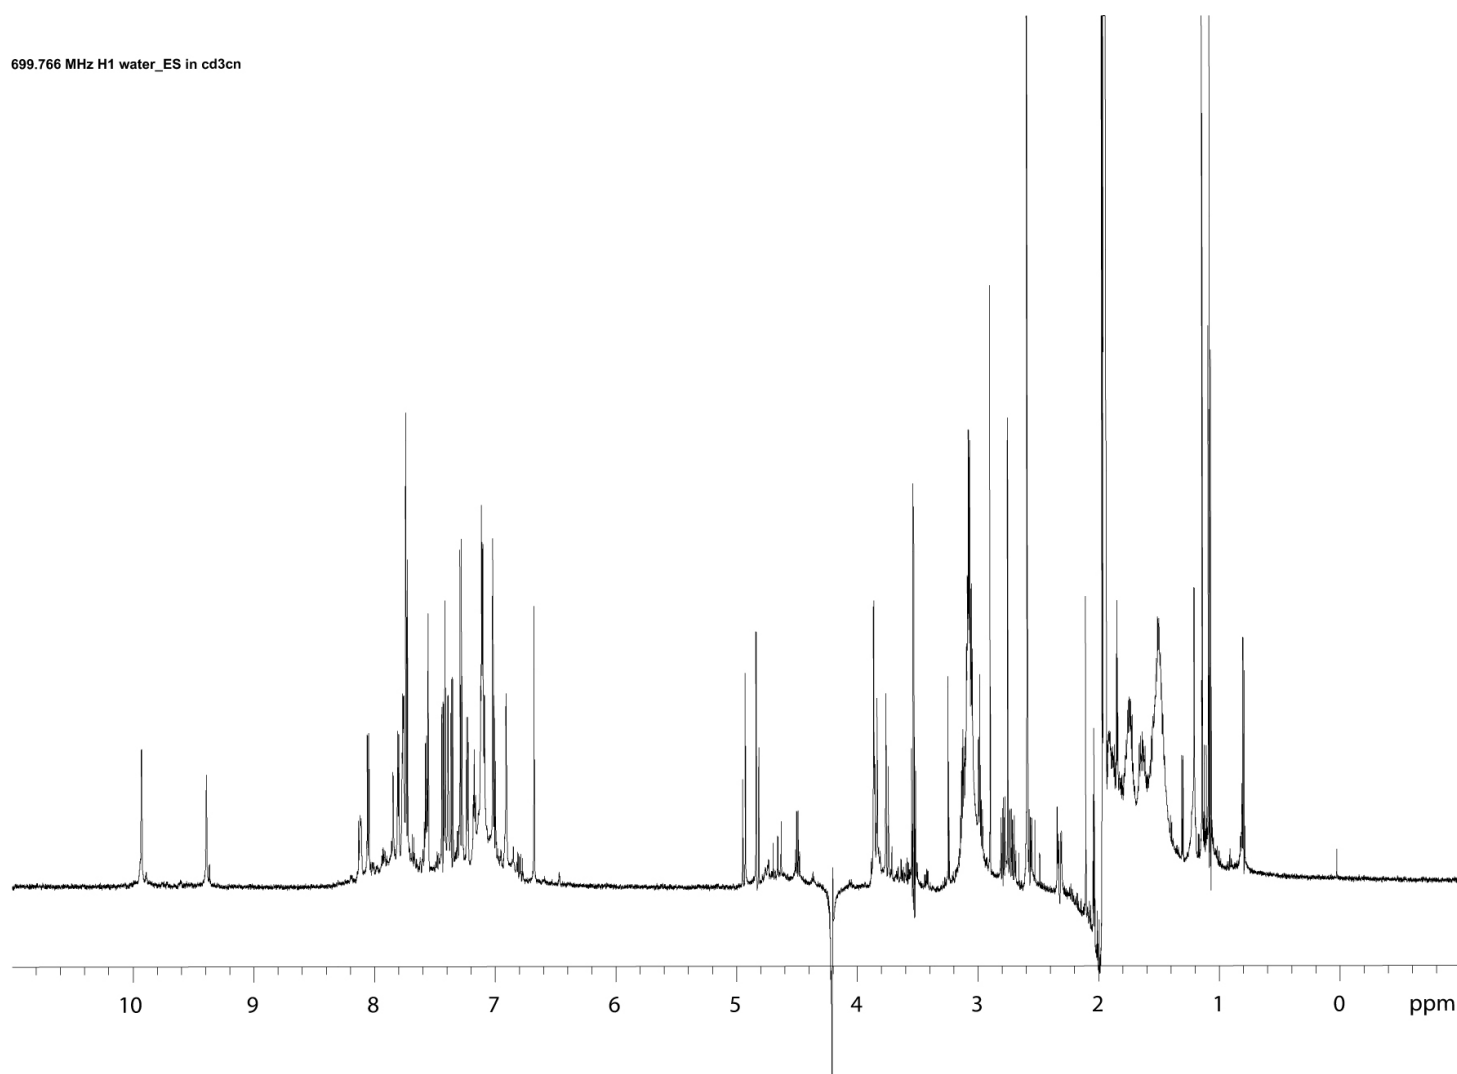

# TOCSY-NMR of **3a**

temp 27.5 C -> actual temp = 27.0 C, coldid probe

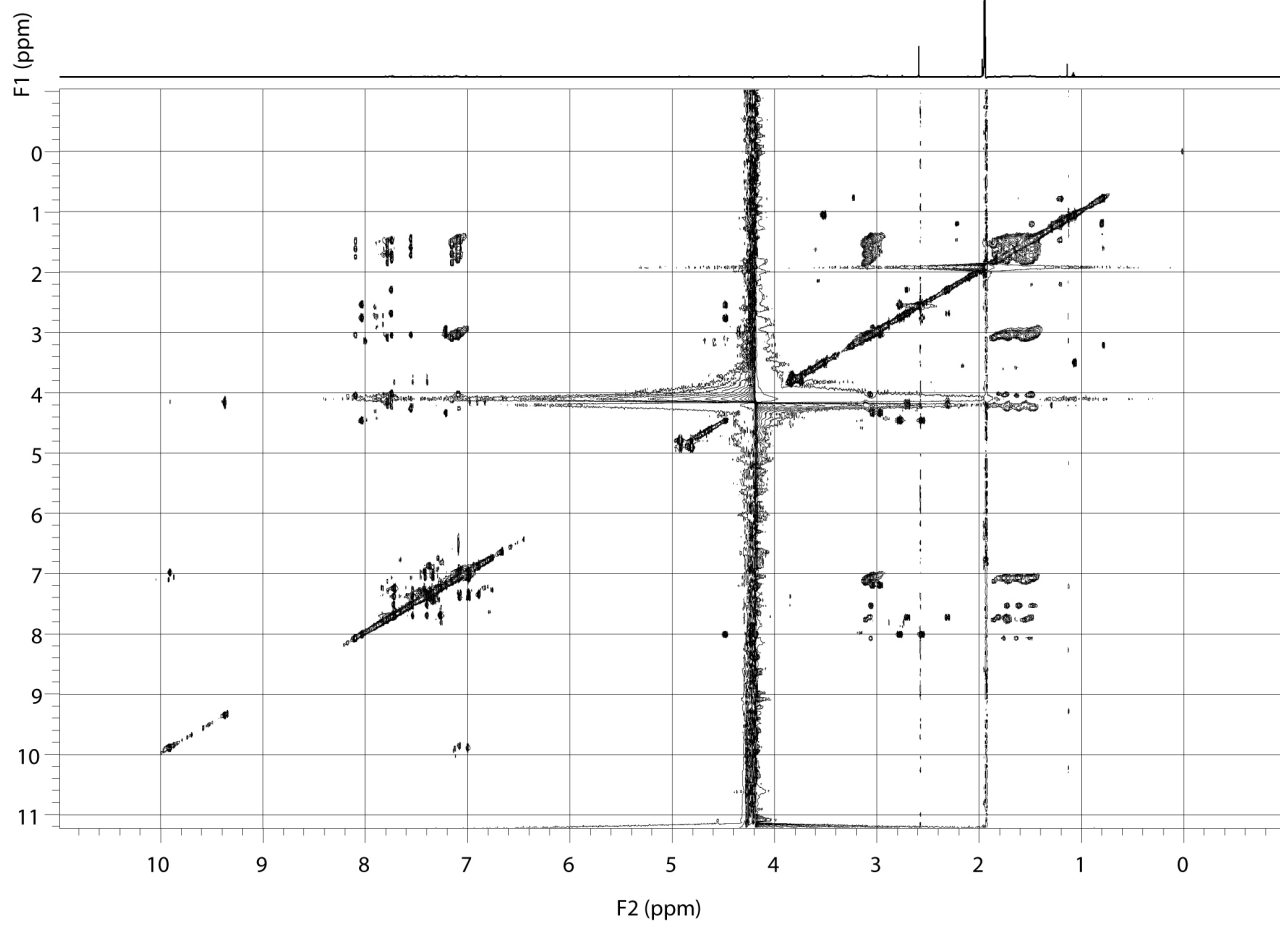

# ROESY-NMR of **3a**

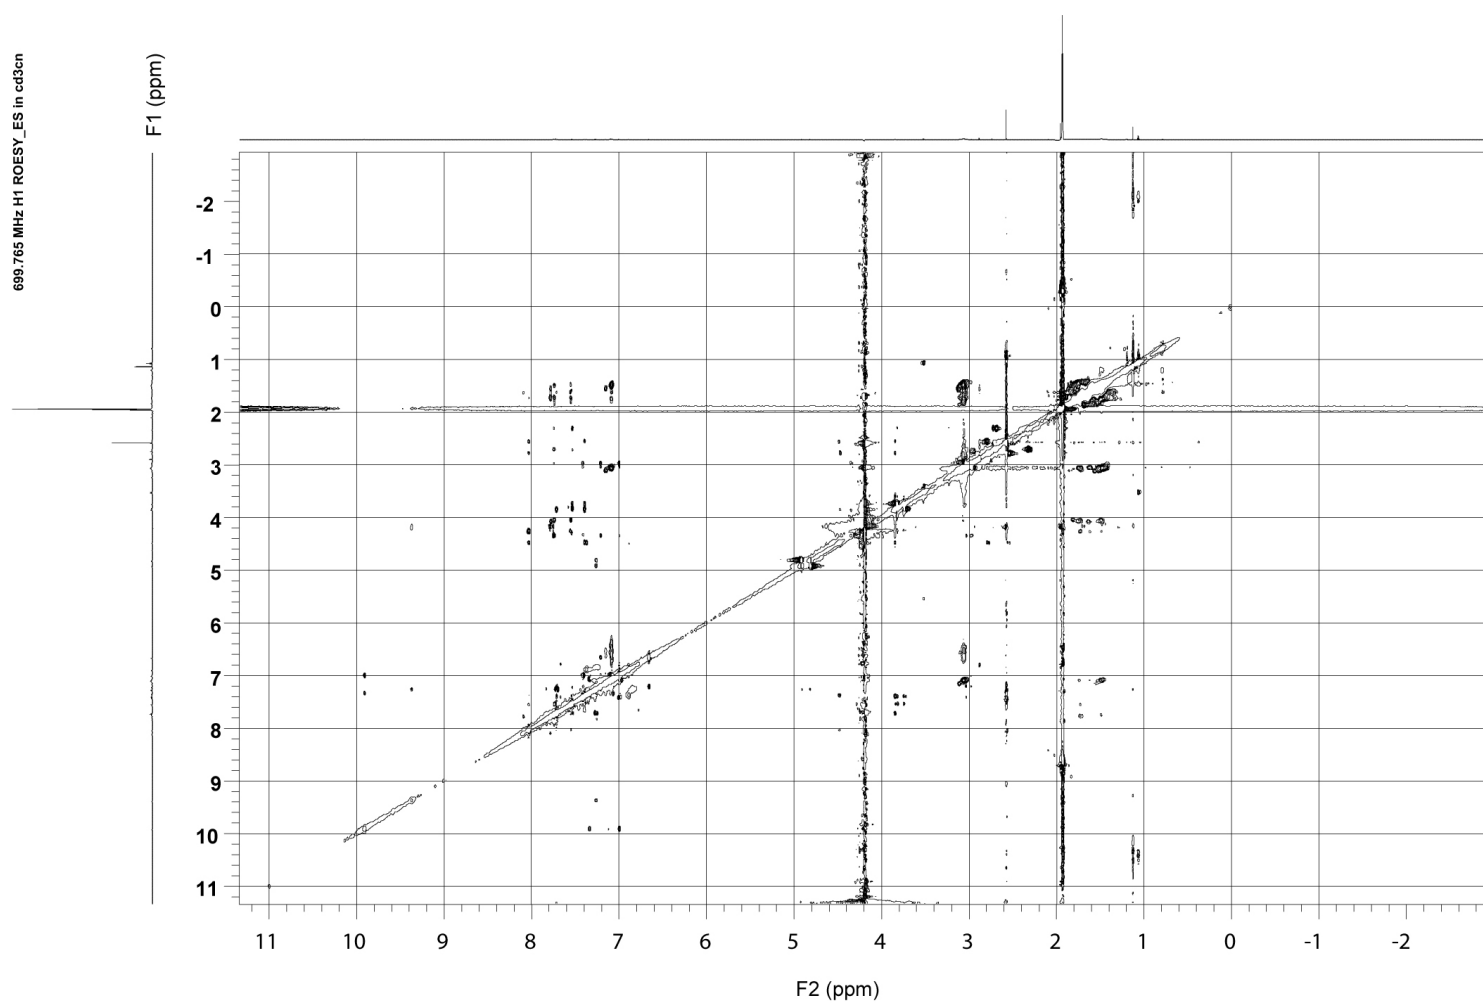

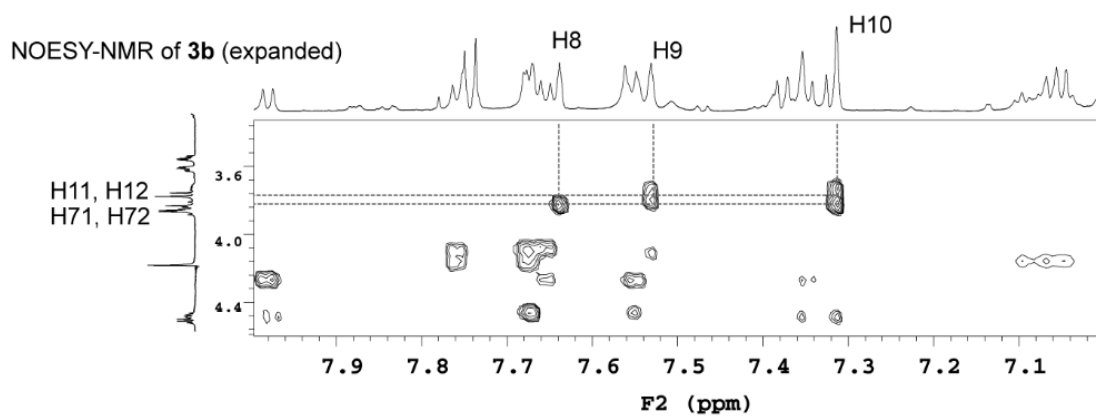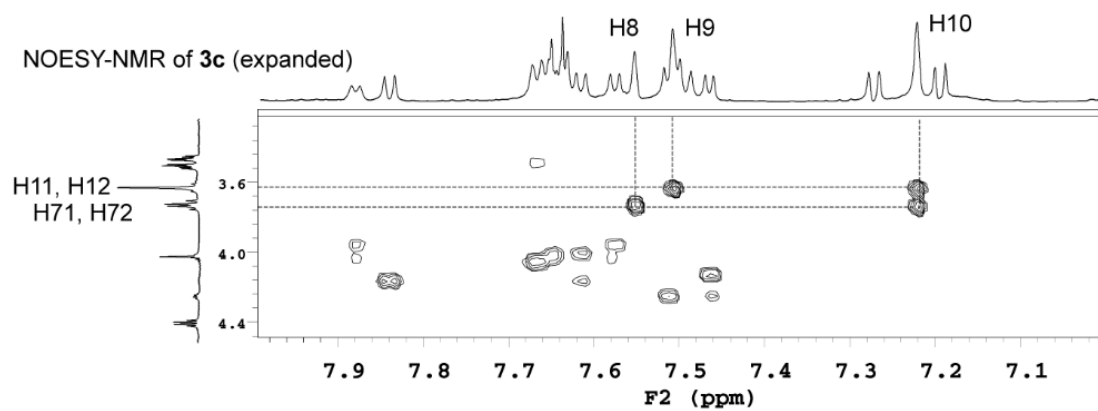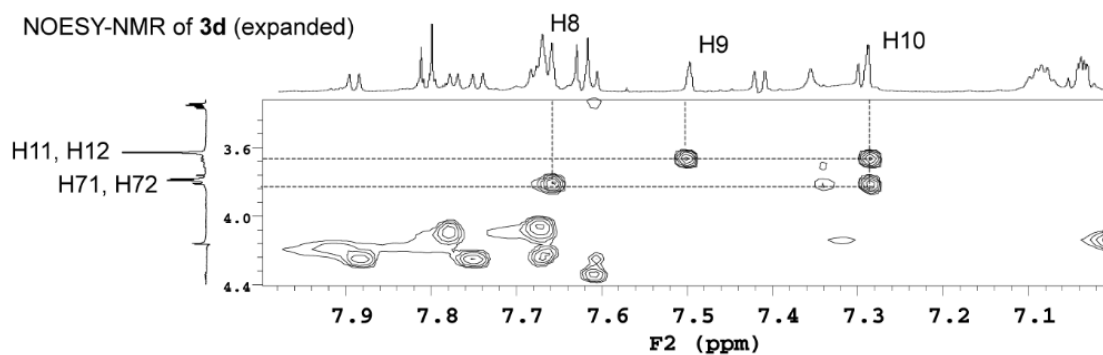

NOESY-NMR of **3b** (expanded)

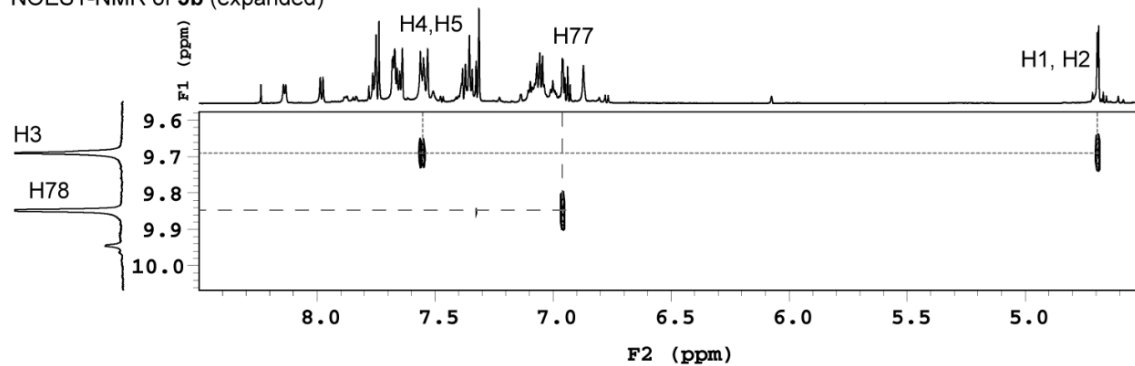

NOESY-NMR of **3c** (expanded)

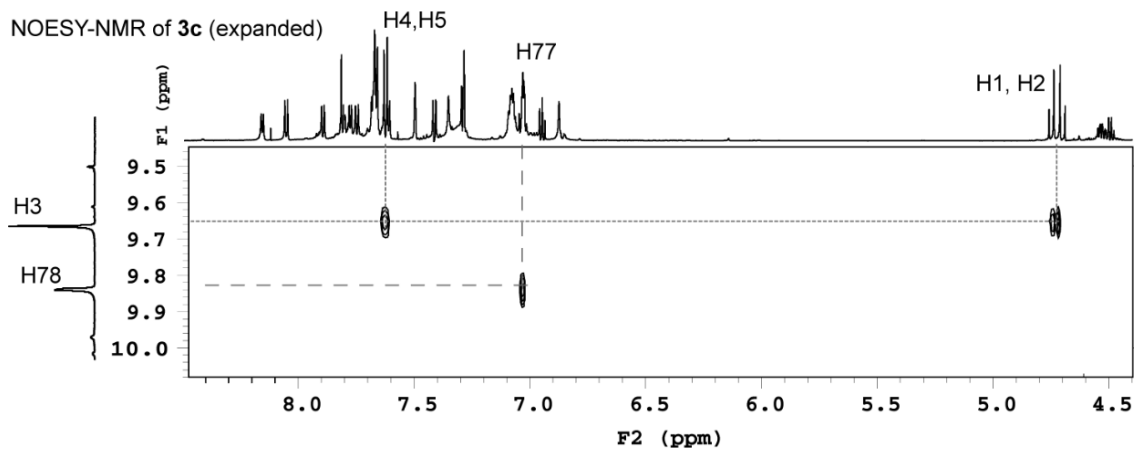

NOESY-NMR of **3d** (expanded)

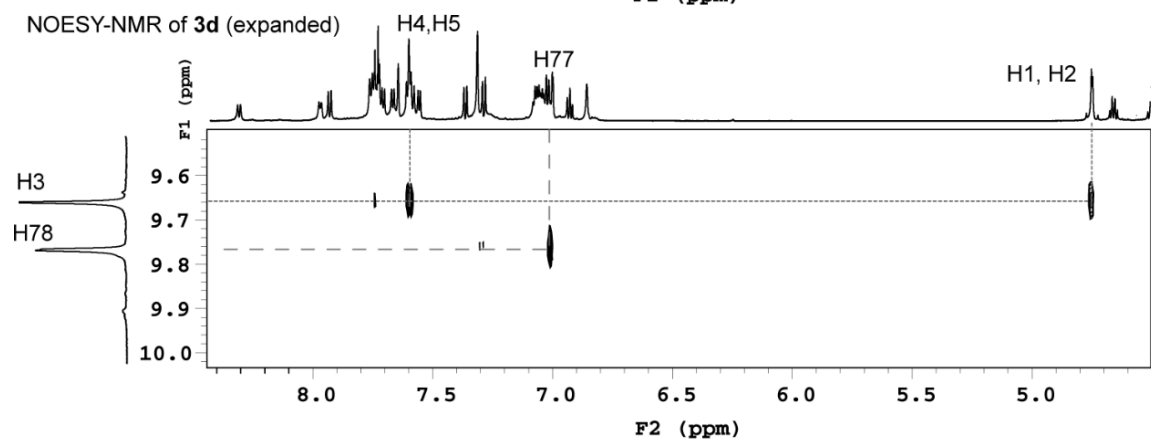

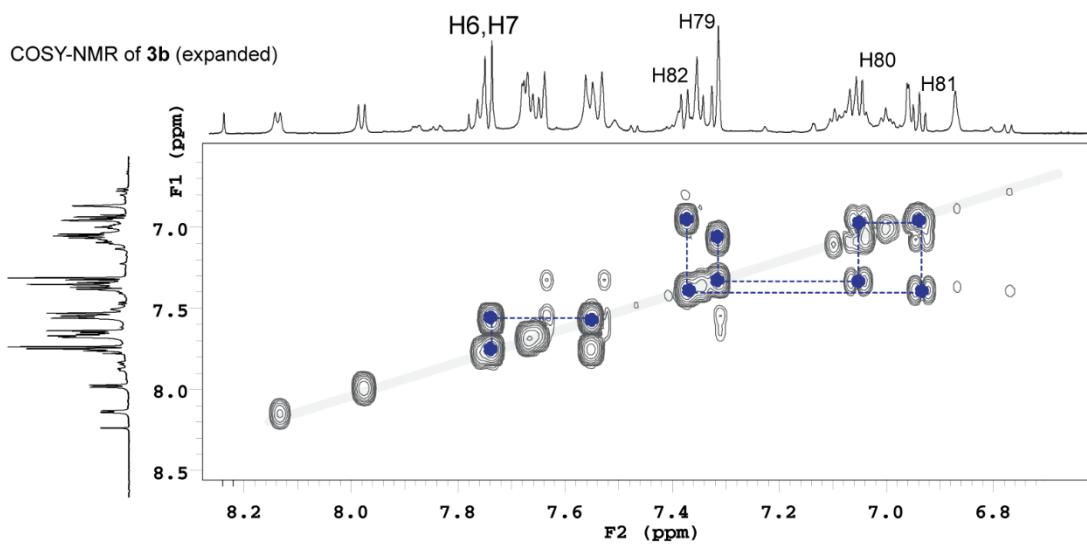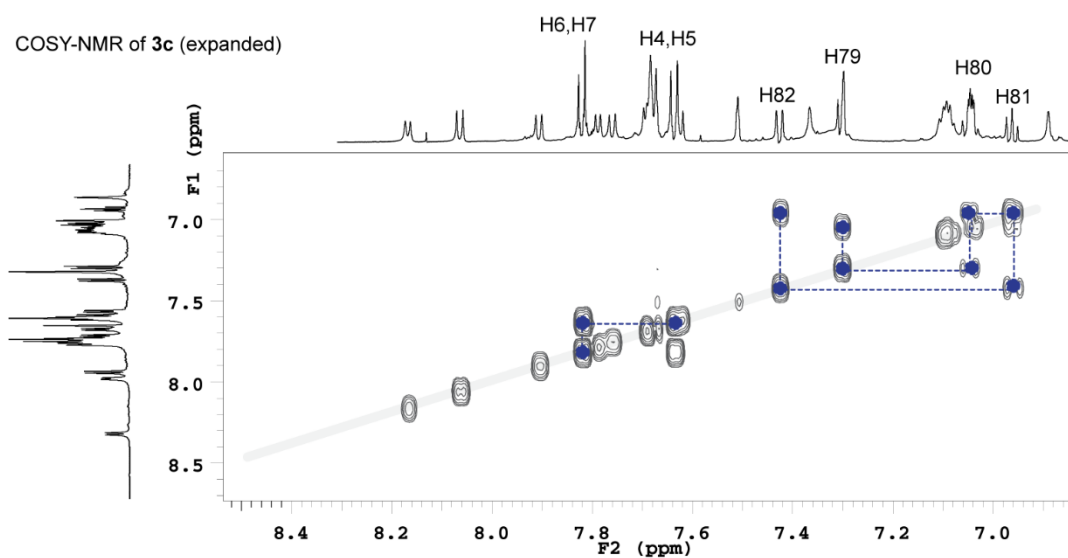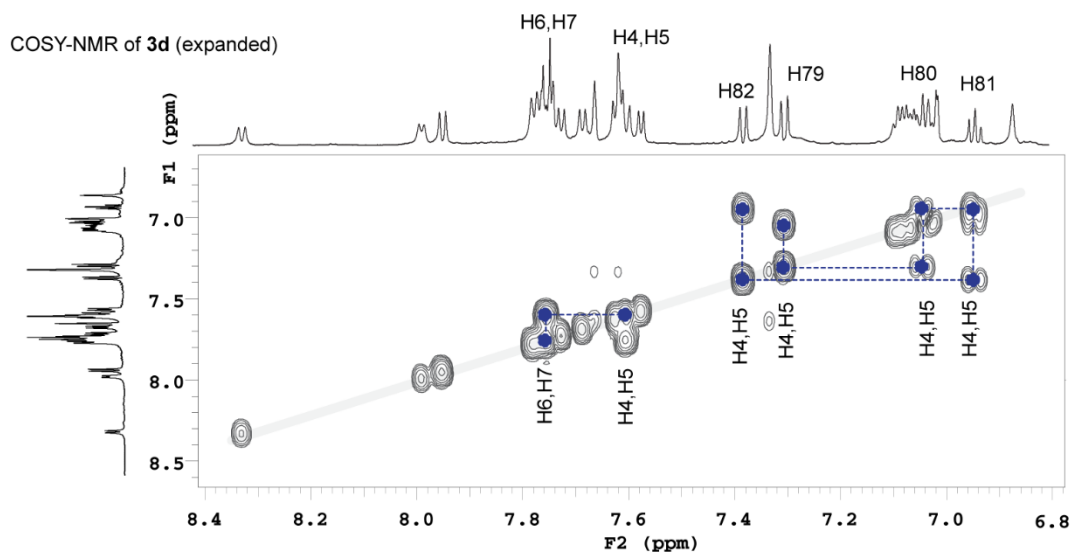

### Supporting Information References

1. Zheng, J.; Lin, S.; Jiang, B. W.; Marder, T. B.; Yang, Z. *Can. J Chem.* **2012**, 90, 138.
2. Kim, Y.-W.; Grossmann, T.N.; Verdine, G.L. *Nat. Protocols* **2011**, 6, 761.
